# Supplementary material
Source: PubMed Central journal article supplement (PMC2882619)
Supplement: tpj200951x1.pdf [file tpj200951x1.pdf]

**Supplementary Table 1:** Composition of diet

| <b>Ingredient</b>    | <b>% of calories</b> | <b>AHA diet + Fenofibrate<br/>(gr/Kgr)</b> |
|----------------------|----------------------|--------------------------------------------|
| <b>PROTEIN</b>       | 18.2                 |                                            |
| Casein               |                      | 100                                        |
| Lactalbumin          |                      | 100                                        |
| <b>CARBOHYDRATES</b> | 54.3                 |                                            |
| Dextrose             |                      | 187                                        |
| Cornstarch           |                      | 313                                        |
| Cellulose            |                      | 100                                        |
| <b>FAT</b>           | 27.5                 |                                            |
| Butter-chol stripped |                      | 16                                         |
| Tallow-chol stripped |                      | 54                                         |
| Soybean              |                      | 65                                         |
| <b>MINERAL MIX</b>   |                      |                                            |
| (Ausman-Hayes)       |                      | 50                                         |
| Fenofibrate          |                      | .31*                                       |
| <b>VITAMIN MIX</b>   |                      |                                            |
| (Hayes-Cathcart)     |                      | 12                                         |
| Choline chloride     |                      | 3                                          |
| Cholesterol          |                      | 0.8                                        |

\* included in the diet of the fenofibrate treated group.
