# Supplementary material
Source: PubMed Central journal article supplement (PMC2882619)
Supplement: tpj200951x2.pdf [file tpj200951x2.pdf]

**Supplementary Table 2:** Significant gene expression changes (313 probe sets) between treated and untreated mice as calculated by the SAM software, using 2 fold and 0% median FDR thresholds.

| Affy ID      | Gene Name                                                            | Symbol            | Fold   | GO Biological Process                                                                                                                                    | GO Molecular Function                                                                                                                                                                                                                                                                 | GO Cellular Component                                                                                                 |
|--------------|----------------------------------------------------------------------|-------------------|--------|----------------------------------------------------------------------------------------------------------------------------------------------------------|---------------------------------------------------------------------------------------------------------------------------------------------------------------------------------------------------------------------------------------------------------------------------------------|-----------------------------------------------------------------------------------------------------------------------|
| 1424352_at   | cytochrome P450, family 4, subfamily a, polypeptide 12               | Cyp4a12           | 192.53 | fatty acid metabolic process /// oxidation reduction                                                                                                     | monooxygenase activity /// monooxygenase activity /// monooxygenase activity /// iron ion binding /// electron carrier activity /// oxidoreductase activity /// heme binding /// metal ion binding /// unspecific monooxygenase activity                                              | endoplasmic reticulum /// endoplasmic reticulum membrane /// microsome /// membrane                                   |
| 1438448_at   | otopetrin 1                                                          | Otop1             | 100.60 | ossification /// detection of gravity /// inner ear morphogenesis                                                                                        | ---                                                                                                                                                                                                                                                                                   | extracellular region /// membrane /// membrane /// integral to membrane                                               |
| 1435275_at   | cytochrome c oxidase subunit VIb polypeptide 2                       | Cox6b2            | 53.56  | oxidation reduction                                                                                                                                      | cytochrome-c oxidase activity                                                                                                                                                                                                                                                         | mitochondrion /// mitochondrial crista /// mitochondrial crista                                                       |
| 1416023_at   | fatty acid binding protein 3, muscle and heart                       | Fabp3             | 28.28  | phosphatidylcholine biosynthetic process /// transport                                                                                                   | transporter activity /// binding /// lipid binding                                                                                                                                                                                                                                    | cytoplasm                                                                                                             |
| 1416930_at   | lymphocyte antigen 6 complex, locus D                                | Ly6d              | 26.63  | defense response                                                                                                                                         | ---                                                                                                                                                                                                                                                                                   | extracellular space /// plasma membrane /// membrane /// anchored to membrane                                         |
| 1433601_at   | adrenergic receptor, alpha 2a                                        | Adra2a            | 24.82  | signal transduction /// G-protein coupled receptor protein signaling pathway /// G-protein coupled receptor protein signaling pathway /// fear response  | rhodopsin-like receptor activity /// signal transducer activity /// receptor activity /// G-protein coupled receptor activity /// adrenoceptor activity /// adrenoceptor activity /// alpha2-adrenergic receptor activity /// alpha2-adrenergic receptor activity /// protein binding | plasma membrane /// membrane /// integral to membrane                                                                 |
| 1419504_at   | monoacylglycerol O-acyltransferase 1                                 | Mogat1            | 19.78  | glycerol metabolic process /// lipid metabolic process /// diacylglycerol biosynthetic process /// lipid biosynthetic process /// cell redox homeostasis | 2-acylglycerol O-acyltransferase activity /// 2-acylglycerol O-acyltransferase activity /// diacylglycerol O-acyltransferase activity /// acyltransferase activity /// transferase activity                                                                                           | membrane fraction /// endoplasmic reticulum /// endoplasmic reticulum membrane /// membrane /// integral to membrane  |
| 1415777_at   | pancreatic lipase related protein 1                                  | Pnlipr1           | 19.06  | lipid metabolic process /// lipid metabolic process /// lipid catabolic process /// lipid catabolic process                                              | catalytic activity /// catalytic activity /// triacylglycerol lipase activity /// triacylglycerol lipase activity /// hydrolase activity /// hydrolase activity                                                                                                                       | extracellular region /// extracellular space                                                                          |
| 1417867_at   | complement factor D (adipsin)                                        | Cfd               | 17.51  | proteolysis /// immune response /// complement activation, alternative pathway /// innate immune response                                                | complement factor D activity /// catalytic activity /// serine-type endopeptidase activity /// peptidase activity /// hydrolase activity                                                                                                                                              | extracellular region /// extracellular space /// extracellular space                                                  |
| 1429523_a_at | solute carrier family 39 (metal ion transporter), member 5           | Slc39a5           | 15.67  | transport /// ion transport /// zinc ion transport /// zinc ion transport /// cellular zinc ion homeostasis /// metal ion transport                      | zinc ion transmembrane transporter activity /// zinc ion binding /// metal ion transmembrane transporter activity                                                                                                                                                                     | membrane /// integral to membrane /// basolateral plasma membrane /// basolateral plasma membrane                     |
| 1440134_at   | cytochrome P450, family 4, subfamily a, polypeptide 31               | Cyp4a31           | 11.27  | oxidation reduction                                                                                                                                      | monooxygenase activity /// iron ion binding /// electron carrier activity /// oxidoreductase activity /// heme binding /// metal ion binding                                                                                                                                          | ---                                                                                                                   |
| 1431056_a_at | lipoprotein lipase /// similar to Lipoprotein lipase precursor (LPL) | LOC669888 /// Lpl | 9.93   | lipid metabolic process /// lipid catabolic process /// triacylglycerol catabolic process                                                                | catalytic activity /// lipoprotein lipase activity /// lipoprotein lipase activity /// triacylglycerol lipase activity /// lipid transporter activity /// heparin binding /// hydrolase activity /// triglyceride binding                                                             | extracellular space /// extracellular space /// plasma membrane /// membrane /// anchored to membrane /// chylomicron |

|              |                                                             |                 |      |                                                                                                                                                                                                   |                                                                                                                                                                                                                                                                                                                             |                                                                                                                                                          |
|--------------|-------------------------------------------------------------|-----------------|------|---------------------------------------------------------------------------------------------------------------------------------------------------------------------------------------------------|-----------------------------------------------------------------------------------------------------------------------------------------------------------------------------------------------------------------------------------------------------------------------------------------------------------------------------|----------------------------------------------------------------------------------------------------------------------------------------------------------|
| 1443902_at   | RIKEN cDNA 6430573F11 gene                                  | 6430573F11Rik   | 9.00 | metabolic process                                                                                                                                                                                 | methyltransferase activity /// transferase activity ---                                                                                                                                                                                                                                                                     |                                                                                                                                                          |
| 1417273_at   | pyruvate dehydrogenase kinase, isoenzyme 4                  | Pdk4            | 8.87 | carbohydrate metabolic process /// glucose metabolic process /// acetyl-CoA biosynthetic process from pyruvate /// signal transduction /// phosphorylation /// peptidyl-histidine phosphorylation | two-component sensor activity /// protein histidine kinase activity /// protein serine/threonine/tyrosine kinase activity /// pyruvate dehydrogenase (acetyl-transferring) kinase activity /// ATP binding /// kinase activity /// transferase activity /// transferase activity, transferring phosphorus-containing groups | mitochondrion /// mitochondrion /// mitochondrial inner membrane /// mitochondrial matrix                                                                |
| 1434382_at   | serine incorporator 2                                       | Serinc2         | 8.87 | phosphatidylserine metabolic process /// positive --- regulation of transferase activity                                                                                                          |                                                                                                                                                                                                                                                                                                                             | membrane /// integral to membrane /// integral to membrane                                                                                               |
| 1415904_at   | lipoprotein lipase                                          | Lpl             | 8.85 | lipid metabolic process /// lipid catabolic process /// triacylglycerol catabolic process                                                                                                         | catalytic activity /// lipoprotein lipase activity /// lipoprotein lipase activity /// triacylglycerol lipase activity /// lipid transporter activity /// heparin binding /// hydrolase activity /// triglyceride binding                                                                                                   | extracellular space /// extracellular space /// plasma membrane /// membrane /// anchored to membrane /// chylomicron                                    |
| 1422996_at   | acyl-CoA thioesterase 2                                     | Acot2           | 8.75 | lipid metabolic process /// acyl-CoA metabolic process                                                                                                                                            | carboxylesterase activity /// palmitoyl-CoA hydrolase activity /// acyl-CoA thioesterase activity /// hydrolase activity                                                                                                                                                                                                    | mitochondrion /// mitochondrion /// mitochondrion /// mitochondrial matrix                                                                               |
| 1418989_at   | cathepsin E                                                 | Ctse            | 8.65 | proteolysis /// antigen processing and presentation of exogenous peptide antigen via MHC class II                                                                                                 | aspartic-type endopeptidase activity /// cathepsin E activity /// cathepsin E activity /// pepsin A activity /// neutrophil collagenase activity /// peptidase activity /// hydrolase activity /// protein homodimerization activity                                                                                        | extracellular space /// endosome /// endosome /// viral envelope                                                                                         |
| 1442508_at   | RIKEN cDNA 4933404M19 gene                                  | 4933404M19Rik   | 8.46 | ---                                                                                                                                                                                               | ---                                                                                                                                                                                                                                                                                                                         | ---                                                                                                                                                      |
| 1424716_at   | retinol saturase (all trans retinol 13,14 reductase)        | Retsat          | 7.67 | carotenoid biosynthetic process /// retinol metabolic process /// oxidation reduction                                                                                                             | electron carrier activity /// oxidoreductase activity /// oxidoreductase activity /// oxidoreductase activity, acting on paired donors, with incorporation or reduction of molecular oxygen /// FAD binding /// all-trans-retinol 13,14-reductase activity /// all-trans-retinol 13,14-reductase activity                   | nuclear outer membrane /// endoplasmic reticulum /// endoplasmic reticulum membrane /// endoplasmic reticulum membrane /// membrane /// nuclear membrane |
| 1418213_at   | keratin 23                                                  | Krt23           | 7.38 | ---                                                                                                                                                                                               | structural molecule activity                                                                                                                                                                                                                                                                                                | intermediate filament                                                                                                                                    |
| 1417963_at   | phospholipid transfer protein                               | Pltp            | 6.98 | transport /// lipid transport                                                                                                                                                                     | lipid binding                                                                                                                                                                                                                                                                                                               | extracellular region /// extracellular space                                                                                                             |
| 1456096_at   | RIKEN cDNA 6430573F11 gene                                  | 6430573F11Rik   | 6.88 | metabolic process                                                                                                                                                                                 | methyltransferase activity /// transferase activity ---                                                                                                                                                                                                                                                                     |                                                                                                                                                          |
| 1422997_s_at | acyl-CoA thioesterase 1 /// acyl-CoA thioesterase 2         | Acot1 /// Acot2 | 6.59 | long-chain fatty acid metabolic process /// lipid metabolic process /// acyl-CoA metabolic process                                                                                                | carboxylesterase activity /// palmitoyl-CoA hydrolase activity /// acyl-CoA thioesterase activity /// acyl-CoA thioesterase activity /// hydrolase activity                                                                                                                                                                 | cytoplasm /// cytoplasm /// mitochondrion /// mitochondrion /// mitochondrion /// mitochondrial matrix                                                   |
| 1424943_at   | cytochrome P450, family 4, subfamily a, polypeptide 31      | Cyp4a31         | 6.58 | oxidation reduction                                                                                                                                                                               | monooxygenase activity /// iron ion binding /// electron carrier activity /// oxidoreductase activity /// heme binding /// metal ion binding                                                                                                                                                                                | ---                                                                                                                                                      |
| 1422811_at   | solute carrier family 27 (fatty acid transporter), member 1 | Slc27a1         | 6.29 | long-chain fatty acid metabolic process /// lipid metabolic process /// fatty acid metabolic process /// transport /// lipid transport /// metabolic process                                      | nucleotide binding /// catalytic activity /// long-chain-fatty-acid-CoA ligase activity /// transporter activity /// binding /// ligase activity                                                                                                                                                                            | cytoplasm /// plasma membrane /// plasma membrane /// endomembrane system /// membrane /// integral to membrane /// cytoplasmic vesicle                  |
| 1441971_at   | Transcribed locus                                           | ---             | 6.25 | ---                                                                                                                                                                                               | ---                                                                                                                                                                                                                                                                                                                         | ---                                                                                                                                                      |
| 1419738_a_at | tropomyosin 2, beta                                         | Tpm2            | 6.23 | muscle contraction                                                                                                                                                                                | actin binding /// structural constituent of cytoskeleton /// protein binding                                                                                                                                                                                                                                                | cytoplasm /// cytoskeleton /// muscle thin filament tropomyosin                                                                                          |

|              |                                                             |          |      |                                                                                                                                                                                               |                                                                                                                                                                                                                                     |                                                                                                                                                                                                                                        |
|--------------|-------------------------------------------------------------|----------|------|-----------------------------------------------------------------------------------------------------------------------------------------------------------------------------------------------|-------------------------------------------------------------------------------------------------------------------------------------------------------------------------------------------------------------------------------------|----------------------------------------------------------------------------------------------------------------------------------------------------------------------------------------------------------------------------------------|
| 1435658_at   | solute carrier family 27 (fatty acid transporter), member 1 | Slc27a1  | 6.17 | long-chain fatty acid metabolic process /// lipid metabolic process /// fatty acid metabolic process /// transport /// lipid transport /// metabolic process                                  | nucleotide binding /// catalytic activity /// long-chain-fatty-acid-CoA ligase activity /// transporter activity /// binding /// ligase activity                                                                                    | cytoplasm /// plasma membrane /// plasma membrane /// endomembrane system /// membrane /// integral to membrane /// cytoplasmic vesicle                                                                                                |
| 1425028_a_at | tropomyosin 2, beta                                         | Tpm2     | 6.15 | muscle contraction                                                                                                                                                                            | actin binding /// structural constituent of cytoskeleton /// protein binding                                                                                                                                                        | cytoplasm /// cytoskeleton /// muscle thin filament tropomyosin                                                                                                                                                                        |
| 1428512_at   | basic helix-loop-helix domain containing, class B9          | Bhlhb9   | 6.03 | ---                                                                                                                                                                                           | binding                                                                                                                                                                                                                             | ---                                                                                                                                                                                                                                    |
| 1443870_at   | ATP-binding cassette, sub-family C (CFTR/MRP), member 4     | Abcc4    | 5.77 | transport /// ion transport /// multidrug transport                                                                                                                                           | nucleotide binding /// chloride channel activity /// ATP binding /// multidrug efflux pump activity /// ATPase activity /// nucleoside-triphosphatase activity /// ATPase activity, coupled to transmembrane movement of substances | membrane fraction /// plasma membrane /// membrane /// integral to membrane /// platelet dense granule membrane                                                                                                                        |
| 1449065_at   | acyl-CoA thioesterase 1                                     | Acot1    | 5.69 | long-chain fatty acid metabolic process /// lipid metabolic process /// acyl-CoA metabolic process                                                                                            | carboxylesterase activity /// palmitoyl-CoA hydrolase activity /// acyl-CoA thioesterase activity /// acyl-CoA thioesterase activity /// hydrolase activity                                                                         | cytoplasm /// cytoplasm                                                                                                                                                                                                                |
| 1418328_at   | carnitine palmitoyltransferase 1b, muscle                   | Cpt1b    | 5.67 | lipid metabolic process /// fatty acid metabolic process /// fatty acid metabolic process /// transport /// transport /// long-chain fatty acid transport /// long-chain fatty acid transport | carnitine O-palmitoyltransferase activity /// carnitine O-palmitoyltransferase activity /// protein binding /// acyltransferase activity /// kinase activity /// transferase activity                                               | mitochondrion /// mitochondrion /// mitochondrion /// mitochondrial outer membrane /// mitochondrial outer membrane /// microsome /// membrane /// integral to membrane /// integral to membrane /// outer membrane /// outer membrane |
| 1417860_a_at | spondin 2, extracellular matrix protein                     | Spon2    | 5.65 | immune response /// cell adhesion /// multicellular organismal development                                                                                                                    | protein binding                                                                                                                                                                                                                     | extracellular region /// proteinaceous extracellular matrix /// extracellular space                                                                                                                                                    |
| 1421011_at   | hydroxysteroid (17-beta) dehydrogenase 11                   | Hsd17b11 | 5.49 | steroid biosynthetic process /// androgen catabolic process /// metabolic process /// metabolic process /// lipid biosynthetic process                                                        | catalytic activity /// estradiol 17-beta-dehydrogenase activity /// binding /// steroid dehydrogenase activity /// oxidoreductase activity                                                                                          | extracellular region /// cytoplasm                                                                                                                                                                                                     |
| 1417900_a_at | very low density lipoprotein receptor                       | Vldlr    | 5.30 | lipid metabolic process /// transport /// lipid transport /// endocytosis /// steroid metabolic process /// cholesterol metabolic process /// positive regulation of protein kinase activity  | receptor activity /// lipid transporter activity /// calcium ion binding /// protein binding                                                                                                                                        | extracellular space /// extracellular space /// membrane fraction /// coated pit /// membrane /// integral to membrane /// integral to membrane                                                                                        |
| 1423166_at   | CD36 antigen                                                | Cd36     | 5.25 | transport /// cell adhesion /// cell adhesion /// cholesterol transport /// apoptotic cell clearance                                                                                          | receptor activity /// protein binding /// high-density lipoprotein binding                                                                                                                                                          | plasma membrane /// membrane /// integral to membrane /// integral to membrane                                                                                                                                                         |
| 1450883_a_at | CD36 antigen                                                | Cd36     | 5.24 | transport /// cell adhesion /// cell adhesion /// cholesterol transport /// apoptotic cell clearance                                                                                          | receptor activity /// protein binding /// high-density lipoprotein binding                                                                                                                                                          | plasma membrane /// membrane /// integral to membrane /// integral to membrane                                                                                                                                                         |
| 1426989_at   | calsynenin 3                                                | Clstn3   | 4.76 | cell adhesion /// homophilic cell adhesion                                                                                                                                                    | calcium ion binding /// protein binding                                                                                                                                                                                             | Golgi membrane /// endoplasmic reticulum /// endoplasmic reticulum membrane /// Golgi apparatus /// plasma membrane /// membrane /// integral to membrane /// integral to membrane /// postsynaptic membrane                           |
| 1456424_s_at | phospholipid transfer protein                               | Pltp     | 4.73 | transport /// lipid transport                                                                                                                                                                 | lipid binding                                                                                                                                                                                                                       | extracellular region /// extracellular space                                                                                                                                                                                           |
| 1433779_at   | cancer susceptibility candidate 4                           | Casc4    | 4.72 | ---                                                                                                                                                                                           | ---                                                                                                                                                                                                                                 | membrane /// integral to membrane                                                                                                                                                                                                      |
| 1430780_a_at | phosphomannomutase 1                                        | Pmm1     | 4.60 | metabolic process /// mannose biosynthetic process                                                                                                                                            | catalytic activity /// phosphomannomutase activity /// isomerase activity                                                                                                                                                           | cytoplasm                                                                                                                                                                                                                              |

|              |                                                                                                                                       |               |      |                                                                                                                                                                                              |                                                                                                                                                                                                                                                                                                                                                                                    |                                                                                                                                                 |
|--------------|---------------------------------------------------------------------------------------------------------------------------------------|---------------|------|----------------------------------------------------------------------------------------------------------------------------------------------------------------------------------------------|------------------------------------------------------------------------------------------------------------------------------------------------------------------------------------------------------------------------------------------------------------------------------------------------------------------------------------------------------------------------------------|-------------------------------------------------------------------------------------------------------------------------------------------------|
| 1421430_at   | RAD51-like 1 ( <i>S. cerevisiae</i> )                                                                                                 | Rad5111       | 4.49 | DNA metabolic process /// DNA repair /// DNA recombination /// response to DNA damage stimulus                                                                                               | nucleotide binding /// DNA binding /// ATP binding /// DNA-dependent ATPase activity /// nucleoside-triphosphatase activity                                                                                                                                                                                                                                                        | nucleus                                                                                                                                         |
| 1450248_at   | a disintegrin and metallopeptidase domain 11                                                                                          | Adam11        | 4.48 | proteolysis /// integrin-mediated signaling pathway                                                                                                                                          | metalloendopeptidase activity /// peptidase activity /// metallopeptidase activity /// zinc ion binding                                                                                                                                                                                                                                                                            | membrane /// integral to membrane /// integral to membrane                                                                                      |
| 1435893_at   | very low density lipoprotein receptor                                                                                                 | Vldlr         | 4.44 | lipid metabolic process /// transport /// lipid transport /// endocytosis /// steroid metabolic process /// cholesterol metabolic process /// positive regulation of protein kinase activity | receptor activity /// lipid transporter activity /// calcium ion binding /// protein binding                                                                                                                                                                                                                                                                                       | extracellular space /// extracellular space /// membrane fraction /// coated pit /// membrane /// integral to membrane /// integral to membrane |
| 1418123_at   | unc-119 homolog ( <i>C. elegans</i> )                                                                                                 | Unc119        | 4.35 | microtubule-based movement /// visual perception /// response to stimulus                                                                                                                    | structural molecule activity                                                                                                                                                                                                                                                                                                                                                       | microtubule                                                                                                                                     |
| 1455288_at   | RIKEN cDNA 1110036O03 gene                                                                                                            | 1110036O03Rik | 4.31 | ---                                                                                                                                                                                          | ---                                                                                                                                                                                                                                                                                                                                                                                | nucleus /// nucleus                                                                                                                             |
| 1418949_at   | growth differentiation factor 15                                                                                                      | Gdf15         | 4.25 | ---                                                                                                                                                                                          | cytokine activity /// growth factor activity                                                                                                                                                                                                                                                                                                                                       | extracellular region /// extracellular space /// extracellular space                                                                            |
| 1419349_a_at | cytochrome P450, family 2, subfamily d, polypeptide 9                                                                                 | Cyp2d9        | 4.25 | oxidation reduction                                                                                                                                                                          | monooxygenase activity /// iron ion binding /// electron carrier activity /// oxidoreductase activity /// oxidoreductase activity, acting on paired donors, with incorporation or reduction of molecular oxygen, reduced flavin or flavoprotein as one donor, and incorporation of one atom of oxygen /// heme binding /// metal ion binding /// unspecific monooxygenase activity | endoplasmic reticulum /// endoplasmic reticulum membrane /// microsome /// microsome /// membrane                                               |
| 1449577_x_at | tropomyosin 2, beta                                                                                                                   | Tpm2          | 4.23 | muscle contraction                                                                                                                                                                           | actin binding /// structural constituent of cytoskeleton /// protein binding                                                                                                                                                                                                                                                                                                       | cytoplasm /// cytoskeleton /// muscle thin filament tropomyosin                                                                                 |
| 1438310_at   | 10 days neonate cerebellum cDNA, RIKEN full-length enriched library, clone:B930095L19<br>product:unclassifiable, full insert sequence | ---           | 4.20 | ---                                                                                                                                                                                          | ---                                                                                                                                                                                                                                                                                                                                                                                | ---                                                                                                                                             |
| 1419573_a_at | lectin, galactose binding, soluble 1                                                                                                  | Lgals1        | 4.17 | heterophilic cell adhesion /// positive regulation of I-kappaB kinase/NF-kappaB cascade /// myoblast differentiation                                                                         | signal transducer activity /// protein binding /// sugar binding /// galactose binding                                                                                                                                                                                                                                                                                             | extracellular space /// intracellular                                                                                                           |
| 1438258_at   | very low density lipoprotein receptor                                                                                                 | Vldlr         | 4.17 | lipid metabolic process /// transport /// lipid transport /// endocytosis /// steroid metabolic process /// cholesterol metabolic process /// positive regulation of protein kinase activity | receptor activity /// lipid transporter activity /// calcium ion binding /// protein binding                                                                                                                                                                                                                                                                                       | extracellular space /// extracellular space /// membrane fraction /// coated pit /// membrane /// integral to membrane /// integral to membrane |
| 1454078_a_at | galactose-3-O-sulfotransferase 1                                                                                                      | Gal3st1       | 4.14 | galactosylceramide biosynthetic process /// spermatogenesis /// biosynthetic process /// glycolipid biosynthetic process /// myelination                                                     | galactosylceramide sulfotransferase activity /// galactosylceramide sulfotransferase activity /// transferase activity                                                                                                                                                                                                                                                             | Golgi membrane /// Golgi membrane /// extracellular space /// Golgi apparatus /// membrane /// integral to membrane /// integral to membrane    |
| 1453056_at   | solute carrier family 16 (monocarboxylic acid transporters), member 13                                                                | Slc16a13      | 4.14 | transport /// tetracycline transport /// response to antibiotic                                                                                                                              | transporter activity /// symporter activity /// tetracycline:hydrogen antiporter activity                                                                                                                                                                                                                                                                                          | plasma membrane /// membrane /// integral to membrane                                                                                           |
| 1437580_s_at | NIMA (never in mitosis gene a)-related expressed kinase 2                                                                             | Nek2          | 4.08 | mitotic sister chromatid segregation /// protein amino acid phosphorylation /// cell cycle /// mitosis /// meiosis /// cell division                                                         | nucleotide binding /// magnesium ion binding /// protein kinase activity /// protein serine/threonine kinase activity /// protein binding /// ATP binding /// kinase activity /// transferase activity /// metal ion binding                                                                                                                                                       | chromosome, pericentric region /// condensed nuclear chromosome /// spindle pole /// nucleus /// midbody                                        |

|              |                                                                                                                              |                                         |      |                                                                                                                                                                                                                                                                                                                                                                                                                               |                                                                                                                                                                                                                                         |                                                                                                                                                       |
|--------------|------------------------------------------------------------------------------------------------------------------------------|-----------------------------------------|------|-------------------------------------------------------------------------------------------------------------------------------------------------------------------------------------------------------------------------------------------------------------------------------------------------------------------------------------------------------------------------------------------------------------------------------|-----------------------------------------------------------------------------------------------------------------------------------------------------------------------------------------------------------------------------------------|-------------------------------------------------------------------------------------------------------------------------------------------------------|
| 1438676_at   | macrophage activation 2 like ///<br>macrophage activation 2 like<br>LOC626578 /// similar to<br>macrophage activation 2 like | LOC626578 ///<br>LOC673101 ///<br>Mpa2l | 4.07 | immune response                                                                                                                                                                                                                                                                                                                                                                                                               | GTPase activity /// GTP binding                                                                                                                                                                                                         | ---                                                                                                                                                   |
| 1447927_at   | macrophage activation 2 like                                                                                                 | Mpa2l                                   | 4.00 | immune response                                                                                                                                                                                                                                                                                                                                                                                                               | GTPase activity /// GTP binding                                                                                                                                                                                                         | ---                                                                                                                                                   |
| 1455439_a_at | lectin, galactose binding, soluble 1                                                                                         | Lgals1                                  | 4.00 | heterophilic cell adhesion /// positive regulation<br>of I-kappaB kinase/NF-kappaB cascade ///<br>myoblast differentiation                                                                                                                                                                                                                                                                                                    | signal transducer activity /// protein binding ///<br>sugar binding /// galactose binding                                                                                                                                               | extracellular space /// intracellular                                                                                                                 |
| 1434465_x_at | very low density lipoprotein receptor                                                                                        | Vldlr                                   | 3.99 | lipid metabolic process /// transport /// lipid<br>transport /// endocytosis /// steroid metabolic<br>process /// cholesterol metabolic process ///<br>positive regulation of protein kinase activity                                                                                                                                                                                                                         | receptor activity /// lipid transporter activity ///<br>calcium ion binding /// protein binding                                                                                                                                         | extracellular space /// extracellular space ///<br>membrane fraction /// coated pit /// membrane ///<br>integral to membrane /// integral to membrane |
| 1448986_x_at | deoxyribonuclease II alpha                                                                                                   | Dnase2a                                 | 3.94 | DNA metabolic process /// DNA catabolic<br>process /// apoptosis /// multicellular organismal<br>development /// erythrocyte differentiation                                                                                                                                                                                                                                                                                  | nuclease activity /// endonuclease activity ///<br>endodeoxyribonuclease activity ///<br>deoxyribonuclease II activity ///<br>deoxyribonuclease II activity /// protein binding ///<br>hydrolase activity                               | extracellular space /// lysosome /// lysosome                                                                                                         |
| 1430700_a_at | phospholipase A2, group VII<br>(platelet-activating factor<br>acetylhydrolase, plasma)                                       | Pla2g7                                  | 3.91 | inflammatory response /// lipid catabolic process                                                                                                                                                                                                                                                                                                                                                                             | catalytic activity /// 1-alkyl-2-<br>acetylgllycerophosphocholine esterase activity ///<br>hydrolase activity                                                                                                                           | extracellular region /// extracellular space /// 2-<br>acetyl-1-alkylglycerophosphocholine esterase<br>complex                                        |
| 1447845_s_at | vanin 1                                                                                                                      | Vnn1                                    | 3.91 | nitrogen compound metabolic process                                                                                                                                                                                                                                                                                                                                                                                           | hydrolase activity /// hydrolase activity, acting on<br>carbon-nitrogen (but not peptide) bonds ///<br>hydrolase activity, acting on carbon-nitrogen<br>(but not peptide) bonds, in linear amides ///<br>pantetheine hydrolase activity | extracellular space /// plasma membrane ///<br>membrane /// anchored to membrane                                                                      |
| 1447774_x_at | RIKEN cDNA 5730469M10 gene                                                                                                   | 5730469M10Rik                           | 3.86 | ---                                                                                                                                                                                                                                                                                                                                                                                                                           | ---                                                                                                                                                                                                                                     | extracellular region                                                                                                                                  |
| 1417409_at   | Jun oncogene                                                                                                                 | Jun                                     | 3.81 | transcription /// regulation of transcription, DNA-<br>dependent /// regulation of transcription, DNA-<br>dependent /// cellular process /// negative<br>regulation of protein amino acid<br>autophosphorylation /// leading edge cell<br>differentiation /// response to drug /// regulation<br>of transcription /// positive regulation of<br>transcription from RNA polymerase II promoter<br>/// regulation of cell cycle | DNA binding /// DNA binding /// transcription<br>factor activity /// protein binding /// sequence-<br>specific DNA binding /// protein dimerization<br>activity                                                                         | intracellular /// nucleus /// nucleus ///<br>transcription factor complex                                                                             |
| 1434582_at   | ELKS/RAB6-interacting/CAST<br>family member 2                                                                                | Erc2                                    | 3.78 | ---                                                                                                                                                                                                                                                                                                                                                                                                                           | protein binding                                                                                                                                                                                                                         | cytoplasm /// cytoskeleton /// synaptosome ///<br>cell junction /// growth cone /// presynaptic<br>membrane /// synapse                               |
| 1439795_at   | G protein-coupled receptor 64                                                                                                | Gpr64                                   | 3.78 | signal transduction /// G-protein coupled<br>receptor protein signaling pathway /// G-protein<br>coupled receptor protein signaling pathway ///<br>neuropeptide signaling pathway /// neuropeptide<br>signaling pathway                                                                                                                                                                                                       | signal transducer activity /// receptor activity ///<br>G-protein coupled receptor activity /// G-protein<br>coupled receptor activity                                                                                                  | plasma membrane /// membrane /// membrane<br>/// integral to membrane /// integral to membrane                                                        |
| 1449773_s_at | growth arrest and DNA-damage-<br>inducible 45 beta                                                                           | Gadd45b                                 | 3.77 | activation of MAPKK activity /// negative<br>regulation of protein kinase activity /// apoptosis<br>/// multicellular organismal development /// cell<br>differentiation /// regulation of cell cycle                                                                                                                                                                                                                         | protein binding                                                                                                                                                                                                                         | nucleus                                                                                                                                               |

|              |                                                                                                 |                                  |      |                                                                                                                                                                                              |                                                                                                                                                                                                                                                                                                                                                                                                                                                                                |                                                                                                                                                                                                                                                                   |
|--------------|-------------------------------------------------------------------------------------------------|----------------------------------|------|----------------------------------------------------------------------------------------------------------------------------------------------------------------------------------------------|--------------------------------------------------------------------------------------------------------------------------------------------------------------------------------------------------------------------------------------------------------------------------------------------------------------------------------------------------------------------------------------------------------------------------------------------------------------------------------|-------------------------------------------------------------------------------------------------------------------------------------------------------------------------------------------------------------------------------------------------------------------|
| 1419091_a_at | annexin A2                                                                                      | Anxa2                            | 3.76 | angiogenesis /// collagen fibril organization /// fibrinolysis                                                                                                                               | phospholipase inhibitor activity /// calcium ion binding /// protein binding /// protein binding /// calcium-dependent phospholipid binding /// phosphatidylinositol-4,5-bisphosphate binding /// cytoskeletal protein binding                                                                                                                                                                                                                                                 | stress fiber /// extracellular region /// proteinaceous extracellular matrix /// basement membrane /// membrane fraction /// cytoplasm /// early endosome /// cell junction /// sarcolemma /// melanosome /// protein complex /// perinuclear region of cytoplasm |
| 1450971_at   | growth arrest and DNA-damage-inducible 45 beta                                                  | Gadd45b                          | 3.74 | activation of MAPKK activity /// negative regulation of protein kinase activity /// apoptosis /// multicellular organismal development /// cell differentiation /// regulation of cell cycle | protein binding                                                                                                                                                                                                                                                                                                                                                                                                                                                                | nucleus                                                                                                                                                                                                                                                           |
| 1429154_at   | solute carrier family 35, member F2                                                             | Slc35f2                          | 3.70 | transport                                                                                                                                                                                    | ---                                                                                                                                                                                                                                                                                                                                                                                                                                                                            | membrane /// integral to membrane /// integral to membrane                                                                                                                                                                                                        |
| 1427981_a_at | cysteine sulfinic acid decarboxylase                                                            | Csad                             | 3.68 | L-cysteine catabolic process to taurine /// taurine metabolic process /// carboxylic acid metabolic process                                                                                  | nucleic acid binding /// catalytic activity /// sulfinoalanine decarboxylase activity /// sulfinoalanine decarboxylase activity /// lyase activity /// carboxy-lyase activity /// carboxy-lyase activity /// pyridoxal phosphate binding catalytic activity /// phosphomannomutase activity /// isomerase activity                                                                                                                                                             | ---                                                                                                                                                                                                                                                               |
| 1424167_a_at | phosphomannomutase 1                                                                            | Pmm1                             | 3.67 | metabolic process /// mannose biosynthetic process                                                                                                                                           | ---                                                                                                                                                                                                                                                                                                                                                                                                                                                                            | cytoplasm                                                                                                                                                                                                                                                         |
| 1419365_at   | peroxisomal biogenesis factor 11a                                                               | Pex11a                           | 3.66 | peroxisome organization and biogenesis /// peroxisome organization and biogenesis /// signal transduction /// peroxisome fission                                                             | ---                                                                                                                                                                                                                                                                                                                                                                                                                                                                            | peroxisome /// peroxisome /// peroxisomal membrane /// integral to peroxisomal membrane /// membrane /// integral to membrane /// integral to membrane                                                                                                            |
| 1431278_s_at | phospholipase A2, group VI                                                                      | Pla2g6                           | 3.65 | lipid metabolic process /// metabolic process /// lipid catabolic process                                                                                                                    | catalytic activity /// phospholipase A2 activity /// hydrolase activity /// nutrient reservoir activity /// calcium-independent phospholipase A2 activity                                                                                                                                                                                                                                                                                                                      | cytoplasm                                                                                                                                                                                                                                                         |
| 1452716_at   | RIKEN cDNA 5730469M10 gene                                                                      | 5730469M10rik                    | 3.61 | ---                                                                                                                                                                                          | ---                                                                                                                                                                                                                                                                                                                                                                                                                                                                            | extracellular region                                                                                                                                                                                                                                              |
| 1424118_a_at | SPC25, NDC80 kinetochore complex component, homolog (S. cerevisiae)                             | Spc25                            | 3.58 | cell cycle /// mitosis /// cell division                                                                                                                                                     | ---                                                                                                                                                                                                                                                                                                                                                                                                                                                                            | chromosome, pericentric region /// nucleus                                                                                                                                                                                                                        |
| 1430307_a_at | malic enzyme, supernatant /// similar to NADP-dependent malic enzyme (NADP-ME) (Malic enzyme 1) | LOC624892 /// LOC677317 /// Mod1 | 3.58 | malate metabolic process /// malate metabolic process /// metabolic process /// response to hormone stimulus                                                                                 | catalytic activity /// malic enzyme activity /// malic enzyme activity /// malate dehydrogenase (decarboxylating) activity /// malate dehydrogenase (oxaloacetate-decarboxylating) (NADP+) activity /// malate dehydrogenase (oxaloacetate-decarboxylating) (NADP+) activity /// binding /// oxidoreductase activity /// oxidoreductase activity, acting on the CH-OH group of donors, NAD or NADP as acceptor /// manganese ion binding /// metal ion binding /// NAD binding | soluble fraction /// cytoplasm /// cytosol                                                                                                                                                                                                                        |
| 1450884_at   | CD36 antigen                                                                                    | Cd36                             | 3.56 | transport /// cell adhesion /// cell adhesion /// cholesterol transport /// apoptotic cell clearance                                                                                         | receptor activity /// protein binding /// high-density lipoprotein binding                                                                                                                                                                                                                                                                                                                                                                                                     | plasma membrane /// membrane /// integral to membrane /// integral to membrane                                                                                                                                                                                    |

|              |                                                                                                                                                               |                       |      |                                                                                                                                                                                              |                                                                                                                                                                                                                                                                                       |                                                                                                                                                 |
|--------------|---------------------------------------------------------------------------------------------------------------------------------------------------------------|-----------------------|------|----------------------------------------------------------------------------------------------------------------------------------------------------------------------------------------------|---------------------------------------------------------------------------------------------------------------------------------------------------------------------------------------------------------------------------------------------------------------------------------------|-------------------------------------------------------------------------------------------------------------------------------------------------|
| 1452864_at   | mediator of RNA polymerase II transcription, subunit 12 homolog (yeast)-like                                                                                  | Med12l                | 3.56 | transcription /// regulation of transcription, DNA-dependent                                                                                                                                 | ---                                                                                                                                                                                                                                                                                   | nucleus                                                                                                                                         |
| 1417008_at   | carnitine acetyltransferase                                                                                                                                   | Crat                  | 3.52 | lipid metabolic process /// fatty acid metabolic process /// transport                                                                                                                       | carnitine O-acetyltransferase activity /// acyltransferase activity /// transferase activity                                                                                                                                                                                          | mitochondrion /// mitochondrion /// mitochondrial inner membrane /// peroxisome /// endoplasmic reticulum /// membrane                          |
| 1438659_x_at | coiled-coil-helix-coiled-coil-helix domain containing 6                                                                                                       | Chchd6                | 3.52 | ---                                                                                                                                                                                          | ---                                                                                                                                                                                                                                                                                   | ---                                                                                                                                             |
| 1439478_at   | acyl-CoA thioesterase 2                                                                                                                                       | Acot2                 | 3.51 | lipid metabolic process /// acyl-CoA metabolic process                                                                                                                                       | carboxylesterase activity /// palmitoyl-CoA hydrolase activity /// acyl-CoA thioesterase activity /// hydrolase activity                                                                                                                                                              | mitochondrion /// mitochondrion /// mitochondrion /// mitochondrial matrix                                                                      |
| 1448188_at   | uncoupling protein 2 (mitochondrial, proton carrier)                                                                                                          | Ucp2                  | 3.49 | response to superoxide /// transport /// mitochondrial transport                                                                                                                             | transporter activity /// binding                                                                                                                                                                                                                                                      | mitochondrion /// mitochondrion /// mitochondrion /// mitochondrial inner membrane /// membrane /// integral to membrane                        |
| 1428083_at   | RIKEN cDNA 2310043N10 gene                                                                                                                                    | 2310043N10Rik         | 3.47 | ---                                                                                                                                                                                          | ---                                                                                                                                                                                                                                                                                   | ---                                                                                                                                             |
| 1421425_a_at | regulator of calcineurin 2                                                                                                                                    | Rcan2                 | 3.46 | calcium-mediated signaling                                                                                                                                                                   | ---                                                                                                                                                                                                                                                                                   | ---                                                                                                                                             |
| 1451156_s_at | very low density lipoprotein receptor                                                                                                                         | Vldlr                 | 3.40 | lipid metabolic process /// transport /// lipid transport /// endocytosis /// steroid metabolic process /// cholesterol metabolic process /// positive regulation of protein kinase activity | receptor activity /// lipid transporter activity /// calcium ion binding /// protein binding                                                                                                                                                                                          | extracellular space /// extracellular space /// membrane fraction /// coated pit /// membrane /// integral to membrane /// integral to membrane |
| 1419491_at   | defensin beta 1                                                                                                                                               | Defb1                 | 3.39 | defense response /// response to bacterium /// defense response to bacterium /// innate immune response                                                                                      | ---                                                                                                                                                                                                                                                                                   | extracellular region /// extracellular space                                                                                                    |
| 1435549_at   | transient receptor potential cation channel, subfamily M, member 4                                                                                            | Trpm4                 | 3.32 | transport /// ion transport /// cation transport /// calcium ion transport /// calcium ion transport /// immune response /// regulation of membrane potential                                | nucleotide binding /// ion channel activity /// calcium activated cation channel activity /// voltage-gated ion channel activity /// cation channel activity /// calcium channel activity /// calcium channel activity /// calcium ion binding /// calmodulin binding /// ATP binding | plasma membrane /// plasma membrane /// membrane /// membrane /// integral to membrane /// integral to membrane /// integral to membrane        |
| 1436890_at   | UDP-N-acetylglucosamine pyrophosphorylase 1-like 1                                                                                                            | Uap1l1                | 3.32 | metabolic process                                                                                                                                                                            | transferase activity /// nucleotidytransferase activity                                                                                                                                                                                                                               | ---                                                                                                                                             |
| 1451488_at   | RIKEN cDNA 1110028A07 gene                                                                                                                                    | 1110028A07Rik         | 3.27 | ---                                                                                                                                                                                          | ---                                                                                                                                                                                                                                                                                   | extracellular space /// membrane /// integral to membrane /// integral to membrane                                                              |
| 1447186_at   | solute carrier family 6, member 16 /// similar to Orphan sodium- and chloride-dependent neurotransmitter transporter NTT5 (Solute carrier family 6 member 16) | LOC672880 /// Slc6a16 | 3.27 | ---                                                                                                                                                                                          | ---                                                                                                                                                                                                                                                                                   | ---                                                                                                                                             |
| 1436314_at   | SCY1-like 2 (S. cerevisiae)                                                                                                                                   | Scy12                 | 3.21 | protein amino acid phosphorylation                                                                                                                                                           | protein kinase activity /// binding /// ATP binding                                                                                                                                                                                                                                   | cytoplasm /// endosome /// Golgi apparatus /// endosome membrane /// membrane /// cytoplasmic vesicle                                           |
| 1421422_at   | RIKEN cDNA 5033411D12 gene                                                                                                                                    | 5033411D12Rik         | 3.19 | metabolic process                                                                                                                                                                            | catalytic activity /// transferase activity                                                                                                                                                                                                                                           | ---                                                                                                                                             |
| 1417336_a_at | synaptotagmin-like 4                                                                                                                                          | Syt4                  | 3.19 | intracellular protein transport /// exocytosis                                                                                                                                               | protein binding /// protein binding /// phospholipid membrane /// extrinsic to plasma membrane /// binding /// zinc ion binding /// zinc ion binding /// Rab GTPase binding /// neurexin binding /// metal ion binding                                                                | secretory granule                                                                                                                               |

|              |                                                                                                 |                                  |      |                                                                                                                                                                           |                                                                                                                                                                                                                                                                                                                                                                                                                                                                                |                                                                                                                        |
|--------------|-------------------------------------------------------------------------------------------------|----------------------------------|------|---------------------------------------------------------------------------------------------------------------------------------------------------------------------------|--------------------------------------------------------------------------------------------------------------------------------------------------------------------------------------------------------------------------------------------------------------------------------------------------------------------------------------------------------------------------------------------------------------------------------------------------------------------------------|------------------------------------------------------------------------------------------------------------------------|
| 1424245_at   | carboxylesterase 2 /// similar to carboxylesterase 2                                            | Ces2 /// LOC667754               | 3.19 | ---                                                                                                                                                                       | catalytic activity /// carboxylesterase activity /// hydrolase activity                                                                                                                                                                                                                                                                                                                                                                                                        | extracellular space                                                                                                    |
| 1429212_a_at | leucine rich repeat containing 51                                                               | Lrrc51                           | 3.15 | ---                                                                                                                                                                       | protein binding                                                                                                                                                                                                                                                                                                                                                                                                                                                                | ---                                                                                                                    |
| 1422906_at   | ATP-binding cassette, sub-family G (WHITE), member 2                                            | Abcg2                            | 3.14 | transport                                                                                                                                                                 | nucleotide binding /// ATP binding /// ATPase activity /// nucleoside-triphosphatase activity                                                                                                                                                                                                                                                                                                                                                                                  | plasma membrane /// membrane /// integral to membrane /// integral to membrane                                         |
| 1448382_at   | enoyl-Coenzyme A, hydratase/3-hydroxyacyl Coenzyme A dehydrogenase                              | Ehhadh                           | 3.14 | lipid metabolic process /// fatty acid metabolic process /// fatty acid beta-oxidation /// fatty acid beta-oxidation /// acyl-CoA metabolic process /// metabolic process | catalytic activity /// 3-hydroxyacyl-CoA dehydrogenase activity /// 3-hydroxyacyl-CoA dehydrogenase activity /// dodecenoyl-CoA delta isomerase activity /// enoyl-CoA hydratase activity /// binding /// oxidoreductase activity /// lyase activity /// isomerase activity /// coenzyme binding                                                                                                                                                                               | mitochondrion /// peroxisome /// peroxisome                                                                            |
| 1433924_at   | paternally expressed 3                                                                          | Peg3                             | 3.13 | apoptosis                                                                                                                                                                 | nucleic acid binding<br>zinc ion binding<br>metal ion binding                                                                                                                                                                                                                                                                                                                                                                                                                  | intracellular nucleus<br>cytoplasm                                                                                     |
| 1425964_x_at | heat shock protein 1                                                                            | Hspb1                            | 3.12 | response to stress                                                                                                                                                        | ---                                                                                                                                                                                                                                                                                                                                                                                                                                                                            | soluble fraction /// insoluble fraction /// nucleus /// cytoplasm /// plasma membrane /// Z disc /// contractile fiber |
| 1427347_s_at | tubulin, beta 2a                                                                                | Tubb2a                           | 3.12 | microtubule-based process /// microtubule-based movement /// protein polymerization                                                                                       | nucleotide binding /// GTPase activity /// structural molecule activity /// structural constituent of cytoskeleton /// protein binding /// GTP binding                                                                                                                                                                                                                                                                                                                         | cytoplasm /// microtubule /// protein complex                                                                          |
| 1455270_at   | a disintegrin and metallopeptidase domain 11                                                    | Adam11                           | 3.11 | proteolysis /// integrin-mediated signaling pathway                                                                                                                       | metalloendopeptidase activity /// peptidase activity /// metallopeptidase activity /// zinc ion binding                                                                                                                                                                                                                                                                                                                                                                        | membrane /// integral to membrane /// integral to membrane                                                             |
| 1449079_s_at | ST3 beta-galactoside alpha-2,3-sialyltransferase 6                                              | St3gal6                          | 3.10 | protein amino acid glycosylation                                                                                                                                          | sialyltransferase activity /// sialyltransferase activity /// transferase activity /// transferase activity, transferring glycosyl groups                                                                                                                                                                                                                                                                                                                                      | Golgi membrane /// Golgi apparatus /// membrane /// integral to membrane /// integral to Golgi membrane                |
| 1436313_at   | SCY1-like 2 (S. cerevisiae)                                                                     | Scy12                            | 3.07 | protein amino acid phosphorylation                                                                                                                                        | protein kinase activity /// binding /// ATP binding                                                                                                                                                                                                                                                                                                                                                                                                                            | cytoplasm /// endosome /// Golgi apparatus /// endosome membrane /// membrane /// cytoplasmic vesicle                  |
| 1418654_at   | hydroxyacid oxidase (glycolate oxidase) 3                                                       | Hao3                             | 3.07 | fatty acid metabolic process /// metabolic process                                                                                                                        | catalytic activity /// (S)-2-hydroxy-acid oxidase activity /// (S)-2-hydroxy-acid oxidase activity /// electron carrier activity /// FMN binding /// oxidoreductase activity                                                                                                                                                                                                                                                                                                   | peroxisome /// peroxisome                                                                                              |
| 1416632_at   | malic enzyme, supernatant /// similar to NADP-dependent malic enzyme (NADP-ME) (Malic enzyme 1) | LOC624892 /// LOC677317 /// Mod1 | 3.06 | malate metabolic process /// malate metabolic process /// metabolic process /// response to hormone stimulus                                                              | catalytic activity /// malic enzyme activity /// malic enzyme activity /// malate dehydrogenase (decarboxylating) activity /// malate dehydrogenase (oxaloacetate-decarboxylating) (NADP+) activity /// malate dehydrogenase (oxaloacetate-decarboxylating) (NADP+) activity /// binding /// oxidoreductase activity /// oxidoreductase activity, acting on the CH-OH group of donors, NAD or NADP as acceptor /// manganese ion binding /// metal ion binding /// NAD binding | soluble fraction /// cytoplasm /// cytosol                                                                             |
| 1422943_a_at | heat shock protein 1                                                                            | Hspb1                            | 3.04 | response to stress                                                                                                                                                        | ---                                                                                                                                                                                                                                                                                                                                                                                                                                                                            | soluble fraction /// insoluble fraction /// nucleus /// cytoplasm /// plasma membrane /// Z disc /// contractile fiber |



|              |                                                                                                                                             |         |      |                                                                                                                     |                                                                                                                                                                                                                                                                                                           |                                                                                                                                             |
|--------------|---------------------------------------------------------------------------------------------------------------------------------------------|---------|------|---------------------------------------------------------------------------------------------------------------------|-----------------------------------------------------------------------------------------------------------------------------------------------------------------------------------------------------------------------------------------------------------------------------------------------------------|---------------------------------------------------------------------------------------------------------------------------------------------|
| 1448752_at   | carbonic anhydrase 2                                                                                                                        | Car2    | 3.02 | morphogenesis of an epithelium /// one-carbon compound metabolic process /// carbon dioxide transport /// secretion | carbonate dehydratase activity /// zinc ion binding /// lyase activity /// metal ion binding                                                                                                                                                                                                              | cytoplasm                                                                                                                                   |
| 1419492_s_at | defensin beta 1                                                                                                                             | Defb1   | 2.99 | defense response /// response to bacterium /// defense response to bacterium /// innate immune response             | ---                                                                                                                                                                                                                                                                                                       | extracellular region /// extracellular space                                                                                                |
| 1422262_a_at | LIM homeobox protein 6                                                                                                                      | Lhx6    | 2.93 | transcription /// regulation of transcription, DNA-dependent /// regulation of transcription                        | DNA binding /// transcription factor activity /// zinc ion binding /// sequence-specific DNA binding /// metal ion binding                                                                                                                                                                                | nucleus /// transcription factor complex                                                                                                    |
| 1459741_x_at | uncoupling protein 2 (mitochondrial, proton carrier)                                                                                        | Ucp2    | 2.92 | response to superoxide /// transport /// mitochondrial transport                                                    | transporter activity /// binding                                                                                                                                                                                                                                                                          | mitochondrion /// mitochondrion /// mitochondrion /// mitochondrial inner membrane /// membrane /// integral to membrane                    |
| 1435963_at   | sema domain, seven thrombospondin repeats (type 1 and type 1-like), transmembrane domain (TM) and short cytoplasmic domain, (semaphorin) 5B | Sema5b  | 2.88 | multicellular organismal development /// nervous system development /// cell differentiation                        | receptor activity                                                                                                                                                                                                                                                                                         | extracellular space /// membrane /// integral to membrane                                                                                   |
| 1459740_s_at | uncoupling protein 2 (mitochondrial, proton carrier)                                                                                        | Ucp2    | 2.85 | response to superoxide /// transport /// mitochondrial transport                                                    | transporter activity /// binding                                                                                                                                                                                                                                                                          | mitochondrion /// mitochondrion /// mitochondrion /// mitochondrial inner membrane /// membrane /// integral to membrane                    |
| 1449619_s_at | Rho GTPase activating protein 9                                                                                                             | Arhgap9 | 2.84 | signal transduction                                                                                                 | GTPase activator activity                                                                                                                                                                                                                                                                                 | intracellular                                                                                                                               |
| 1428803_at   | acyl-CoA thioesterase 6                                                                                                                     | Acot6   | 2.83 | lipid metabolic process /// lipid metabolic process                                                                 | carboxylesterase activity /// palmitoyl-CoA hydrolase activity /// hydrolase activity                                                                                                                                                                                                                     | peroxisome /// peroxisome /// cytosol                                                                                                       |
| 1446423_at   | RAD51-like 1 ( <i>S. cerevisiae</i> )                                                                                                       | Rad5111 | 2.83 | DNA metabolic process<br>DNA repair<br>DNA recombination<br>response to DNA damage stimulus                         | nucleotide binding<br>DNA binding<br>ATP binding<br>DNA-dependent ATPase activity<br>nucleoside-triphosphatase activity                                                                                                                                                                                   | nucleus                                                                                                                                     |
| 1424715_at   | retinol saturase (all trans retinol 13,14 reductase)                                                                                        | Retsat  | 2.82 | carotenoid biosynthetic process /// retinol metabolic process /// oxidation reduction                               | electron carrier activity /// oxidoreductase activity /// oxidoreductase activity /// oxidoreductase activity, acting on paired donors, with incorporation or reduction of molecular oxygen /// FAD binding /// all-trans-retinol 13,14-reductase activity /// all-trans-retinol 13,14-reductase activity | nuclear outer membrane /// endoplasmic reticulum /// endoplasmic reticulum membrane /// endoplasmic reticulum membrane /// nuclear membrane |
| 1423447_at   | caseinolytic peptidase X ( <i>E.coli</i> )                                                                                                  | Clpx    | 2.81 | protein transport                                                                                                   | nucleotide binding /// protein binding /// ATP binding /// peptidase activity /// zinc ion binding /// ATPase activity /// nucleoside-triphosphatase activity /// metal ion binding                                                                                                                       | mitochondrion /// mitochondrion /// mitochondrial inner membrane                                                                            |
| 1418486_at   | vanin 1                                                                                                                                     | Vnn1    | 2.80 | nitrogen compound metabolic process                                                                                 | hydrolase activity /// hydrolase activity, acting on carbon-nitrogen (but not peptide) bonds /// hydrolase activity, acting on carbon-nitrogen (but not peptide) bonds, in linear amides /// pantetheine hydrolase activity                                                                               | extracellular space /// plasma membrane /// membrane /// anchored to membrane                                                               |
| 1427943_at   | acylphosphatase 2, muscle type                                                                                                              | Acyp2   | 2.79 | ---                                                                                                                 | acylphosphatase activity /// hydrolase activity                                                                                                                                                                                                                                                           | ---                                                                                                                                         |

|              |                                                          |         |      |                                                                                                                                                      |                                                                                                                                                                                                                                                                           |                                                                                                                                                                                                                        |
|--------------|----------------------------------------------------------|---------|------|------------------------------------------------------------------------------------------------------------------------------------------------------|---------------------------------------------------------------------------------------------------------------------------------------------------------------------------------------------------------------------------------------------------------------------------|------------------------------------------------------------------------------------------------------------------------------------------------------------------------------------------------------------------------|
| 1449442_at   | peroxisomal biogenesis factor 11a                        | Pex11a  | 2.76 | peroxisome organization and biogenesis /// peroxisome organization and biogenesis /// signal transduction /// peroxisome fission                     | ---                                                                                                                                                                                                                                                                       | peroxisome /// peroxisome /// peroxisomal membrane /// integral to peroxisomal membrane /// membrane /// integral to membrane /// integral to membrane                                                                 |
| 1422147_a_at | phospholipase A2, group VI                               | Pla2g6  | 2.76 | lipid metabolic process /// metabolic process /// lipid catabolic process                                                                            | catalytic activity /// phospholipase A2 activity /// hydrolase activity /// nutrient reservoir activity /// calcium-independent phospholipase A2 activity                                                                                                                 | cytoplasm                                                                                                                                                                                                              |
| 1438740_at   | N-myristoyltransferase 2                                 | Nmt2    | 2.75 | N-terminal protein myristoylation /// N-terminal protein myristoylation /// N-terminal peptidyl-glycine N-myristoylation                             | glycylpeptide N-tetradecanoyltransferase activity /// glycylpeptide N-tetradecanoyltransferase activity /// glycylpeptide N-tetradecanoyltransferase activity /// transferase activity                                                                                    | cytoplasm /// cytoplasm                                                                                                                                                                                                |
| 1437724_x_at | phosphatidylinositol membrane-associated 1               | Pitpm1  | 2.74 | transport /// protein transport                                                                                                                      | calcium ion binding /// phospholipid binding /// metal ion binding                                                                                                                                                                                                        | intracellular /// cytoplasm /// endoplasmic reticulum /// endoplasmic reticulum membrane /// Golgi apparatus /// lipid particle /// monolayer-surrounded lipid storage body /// membrane                               |
| 1434089_at   | synaptopodin                                             | Synpo   | 2.72 | cortical cytoskeleton organization and biogenesis                                                                                                    | actin binding /// actin binding                                                                                                                                                                                                                                           | cytoplasm /// cytoskeleton /// tight junction /// actin cytoskeleton /// membrane /// cell junction /// axon /// dendrite /// cell projection /// dendritic spine /// perikaryon /// synapse /// postsynaptic membrane |
| 1423669_at   | procollagen, type I, alpha 1                             | Col1a1  | 2.69 | phosphate transport /// cell adhesion                                                                                                                | structural molecule activity /// extracellular matrix structural constituent /// extracellular matrix structural constituent conferring tensile strength                                                                                                                  | extracellular region /// proteinaceous extracellular matrix /// collagen /// extracellular space /// cytoplasm                                                                                                         |
| 1415965_at   | stearoyl-Coenzyme A desaturase 1                         | Scd1    | 2.67 | lipid metabolic process /// fatty acid biosynthetic process /// fatty acid biosynthetic process /// lipid biosynthetic process                       | stearoyl-CoA 9-desaturase activity /// iron ion binding /// oxidoreductase activity /// oxidoreductase activity, acting on paired donors, with oxidation of a pair of donors resulting in the reduction of molecular oxygen to two molecules of water                     | endoplasmic reticulum /// endoplasmic reticulum membrane /// membrane /// integral to membrane                                                                                                                         |
| 1433691_at   | protein phosphatase 1, regulatory (inhibitor) subunit 3C | Ppp1r3c | 2.67 | carbohydrate metabolic process /// glycogen metabolic process /// glycogen metabolic process /// glycogen biosynthetic process /// protein targeting | protein binding /// protein phosphatase type 1 regulator activity                                                                                                                                                                                                         | ---                                                                                                                                                                                                                    |
| 1427604_a_at | ATPase, class II, type 9A                                | Atp9a   | 2.66 | transport /// cation transport /// metabolic process /// phospholipid transport                                                                      | nucleotide binding /// magnesium ion binding /// catalytic activity /// phospholipid-translocating ATPase activity /// ATP binding /// ATPase activity, coupled to transmembrane movement of ions, phosphorylative mechanism /// hydrolase activity /// metal ion binding | membrane /// integral to membrane /// integral to membrane                                                                                                                                                             |

|              |                                      |          |      |                                                                                                                                                                                                                                                                                                                                                                                                                                                                                                                                                                                                                                                                                                                                                                                                                                                                     |                                                                                                                                                                                                                                                                                                                                                                                                                                                |                                                                                                                                                    |
|--------------|--------------------------------------|----------|------|---------------------------------------------------------------------------------------------------------------------------------------------------------------------------------------------------------------------------------------------------------------------------------------------------------------------------------------------------------------------------------------------------------------------------------------------------------------------------------------------------------------------------------------------------------------------------------------------------------------------------------------------------------------------------------------------------------------------------------------------------------------------------------------------------------------------------------------------------------------------|------------------------------------------------------------------------------------------------------------------------------------------------------------------------------------------------------------------------------------------------------------------------------------------------------------------------------------------------------------------------------------------------------------------------------------------------|----------------------------------------------------------------------------------------------------------------------------------------------------|
| 1416101_a_at | histone cluster 1, H1c               | Hist1h1c | 2.66 | neurotransmitter uptake /// regulation of the force of heart contraction /// neurological control of breathing /// nucleosome assembly /// nucleosome assembly /// transport /// ion transport /// cation transport /// potassium ion transport /// regulation of muscle contraction /// regulation of smooth muscle contraction /// regulation of striated muscle contraction /// metabolic process /// regulation of blood pressure /// adult locomotory behavior /// visual learning /// monovalent inorganic cation transport /// nucleosome positioning /// regulation of vasoconstriction /// sperm motility /// regulation of cellular pH /// locomotion /// negative regulation of heart contraction /// negative regulation of striated muscle contraction /// chromosome organization and biogenesis /// reduction of cytosolic calcium ion concentration | nucleotide binding /// DNA binding /// DNA binding /// DNA binding /// catalytic activity /// protein binding /// ATP binding /// monovalent inorganic cation transmembrane transporter activity /// ATPase activity, coupled to transmembrane movement of ions, phosphorylative mechanism /// hydrolase activity /// hydrolase activity, acting on acid anhydrides, catalyzing transmembrane movement of substances /// potassium ion binding | nucleosome /// nucleosome /// nucleus /// nucleus /// chromosome /// chromosome /// microsome /// membrane /// integral to membrane /// sarcolemma |
| 1416066_at   | CD9 antigen                          | Cd9      | 2.64 | cell motility /// cell adhesion /// cell adhesion /// single fertilization /// fusion of sperm to egg plasma membrane /// negative regulation of cell proliferation /// paranodal junction assembly                                                                                                                                                                                                                                                                                                                                                                                                                                                                                                                                                                                                                                                                 | protein binding /// protein binding /// protein binding                                                                                                                                                                                                                                                                                                                                                                                        | plasma membrane /// membrane /// integral to membrane                                                                                              |
| 1450243_a_at | regulator of calcineurin 2           | Rcan2    | 2.63 | calcium-mediated signaling                                                                                                                                                                                                                                                                                                                                                                                                                                                                                                                                                                                                                                                                                                                                                                                                                                          | ---                                                                                                                                                                                                                                                                                                                                                                                                                                            | ---                                                                                                                                                |
| 1419103_a_at | abhydrolase domain containing 6      | Abhd6    | 2.63 | ---                                                                                                                                                                                                                                                                                                                                                                                                                                                                                                                                                                                                                                                                                                                                                                                                                                                                 | catalytic activity /// hydrolase activity                                                                                                                                                                                                                                                                                                                                                                                                      | membrane /// integral to membrane /// integral to membrane                                                                                         |
| 1423017_a_at | interleukin 1 receptor antagonist    | Il1rn    | 2.63 | lipid metabolic process /// inflammatory response /// immune response /// cell surface receptor linked signal transduction /// insulin secretion                                                                                                                                                                                                                                                                                                                                                                                                                                                                                                                                                                                                                                                                                                                    | receptor activity /// interleukin-1 receptor binding /// interleukin-1 receptor antagonist activity                                                                                                                                                                                                                                                                                                                                            | extracellular region /// cytoplasm /// integral to plasma membrane                                                                                 |
| 1448694_at   | Jun oncogene                         | Jun      | 2.62 | transcription /// regulation of transcription, DNA-dependent /// regulation of transcription, DNA-dependent /// cellular process /// negative regulation of protein amino acid autophosphorylation /// leading edge cell differentiation /// response to drug /// regulation of transcription /// positive regulation of transcription from RNA polymerase II promoter /// regulation of cell cycle                                                                                                                                                                                                                                                                                                                                                                                                                                                                 | DNA binding /// DNA binding /// transcription factor activity /// protein binding /// sequence-specific DNA binding /// protein dimerization activity                                                                                                                                                                                                                                                                                          | intracellular /// nucleus /// nucleus /// transcription factor complex                                                                             |
| 1416591_at   | RAB34, member of RAS oncogene family | Rab34    | 2.60 | transport /// endocytosis /// small GTPase mediated signal transduction /// protein transport                                                                                                                                                                                                                                                                                                                                                                                                                                                                                                                                                                                                                                                                                                                                                                       | nucleotide binding /// GTPase activity /// GTP binding /// guanyl nucleotide binding                                                                                                                                                                                                                                                                                                                                                           | ruffle /// cytoplasm /// early endosome /// Golgi apparatus                                                                                        |
| 1430388_a_at | sulfatase 2                          | Sulf2    | 2.60 | sulfur metabolic process /// metabolic process /// metabolic process                                                                                                                                                                                                                                                                                                                                                                                                                                                                                                                                                                                                                                                                                                                                                                                                | catalytic activity /// arylsulfatase activity /// calcium ion binding /// N-acetylglucosamine-6-sulfatase activity /// sulfuric ester hydrolase activity /// sulfuric ester hydrolase activity /// hydrolase activity /// phosphoric monoester hydrolase activity /// metal ion binding                                                                                                                                                        | extracellular space /// endoplasmic reticulum /// Golgi apparatus /// cell surface /// cell surface                                                |

|              |                                                                                                                                             |               |      |                                                                                                                                                                                                                                                                                            |                                                                                                                                                                                                |                                                                                                                                                                                                                |
|--------------|---------------------------------------------------------------------------------------------------------------------------------------------|---------------|------|--------------------------------------------------------------------------------------------------------------------------------------------------------------------------------------------------------------------------------------------------------------------------------------------|------------------------------------------------------------------------------------------------------------------------------------------------------------------------------------------------|----------------------------------------------------------------------------------------------------------------------------------------------------------------------------------------------------------------|
| 1416896_at   | ribosomal protein S6 kinase polypeptide 1                                                                                                   | Rps6ka1       | 2.59 | protein amino acid phosphorylation /// protein kinase cascade /// ribosome biogenesis and assembly                                                                                                                                                                                         | nucleotide binding /// magnesium ion binding /// protein kinase activity /// protein serine/threonine kinase activity /// ATP binding /// kinase activity /// transferase activity             | spindle /// ribosome                                                                                                                                                                                           |
| 1455178_at   | small G protein signaling modulator                                                                                                         | Sgsm2         | 2.58 | regulation of Rab GTPase activity                                                                                                                                                                                                                                                          | Rab GTPase activator activity                                                                                                                                                                  | intracellular                                                                                                                                                                                                  |
| 1434897_a_at | solute carrier family 25 (mitochondrial carrier, adenine nucleotide translocator), member 4                                                 | Slc25a4       | 2.57 | transport /// mitochondrial transport /// ADP transport /// ATP transport /// glutamate uptake during transmission of nerve impulse                                                                                                                                                        | transporter activity /// ATP:ADP antiporter activity /// binding                                                                                                                               | mitochondrion /// mitochondrial inner membrane /// mitochondrial inner membrane /// membrane /// integral to membrane                                                                                          |
| 1428176_at   | endothelial differentiation, sphingolipid G-protein-coupled receptor, 5                                                                     | Edg5          | 2.57 | signal transduction /// G-protein coupled receptor protein signaling pathway /// behavior                                                                                                                                                                                                  | rhodopsin-like receptor activity /// lysosphingolipid and lysophosphatidic acid receptor activity /// signal transducer activity /// receptor activity /// G-protein coupled receptor activity | plasma membrane /// integral to plasma membrane /// membrane /// integral to membrane                                                                                                                          |
| 1422445_at   | integrin alpha 6                                                                                                                            | Itga6         | 2.56 | cell adhesion /// cell-matrix adhesion /// integrin-mediated signaling pathway /// positive regulation of cell-cell adhesion /// cell adhesion mediated by integrin /// odontogenesis of dentine containing teeth /// filopodium formation /// leukocyte migration /// leukocyte migration | receptor activity /// integrin binding /// calcium ion binding /// protein binding                                                                                                             | plasma membrane /// integrin complex /// integrin complex /// external side of plasma membrane /// cell surface /// membrane /// integral to membrane /// integral to membrane /// basolateral plasma membrane |
| 1422146_at   | sema domain, seven thrombospondin repeats (type 1 and type 1-like), transmembrane domain (TM) and short cytoplasmic domain, (semaphorin) 5B | Sema5b        | 2.55 | multicellular organismal development /// nervous system development /// cell differentiation                                                                                                                                                                                               | nervous receptor activity                                                                                                                                                                      | extracellular space /// membrane /// integral to membrane                                                                                                                                                      |
| 1420722_at   | elongation of very long chain fatty acids (FEN1/Elo2, SUR4/Elo3, yeast)-like 3                                                              | Elovl3        | 2.53 | fatty acid biosynthetic process /// lipid biosynthetic process                                                                                                                                                                                                                             | ---                                                                                                                                                                                            | endoplasmic reticulum /// endoplasmic reticulum membrane /// membrane /// integral to membrane /// integral to membrane                                                                                        |
| 1423266_at   | RIKEN cDNA 2810405K02 gene                                                                                                                  | 2810405K02Rik | 2.52 | ---                                                                                                                                                                                                                                                                                        | ---                                                                                                                                                                                            | ---                                                                                                                                                                                                            |

|              |                                                      |               |      |                                                                                                                                                                                                                                                                                                                                                                                                                                                                                                                                                                                                                                                                                                                                                                                                                                                                                                                                                                      |                                                                                                                                                                                                                      |                                                                                                                                           |
|--------------|------------------------------------------------------|---------------|------|----------------------------------------------------------------------------------------------------------------------------------------------------------------------------------------------------------------------------------------------------------------------------------------------------------------------------------------------------------------------------------------------------------------------------------------------------------------------------------------------------------------------------------------------------------------------------------------------------------------------------------------------------------------------------------------------------------------------------------------------------------------------------------------------------------------------------------------------------------------------------------------------------------------------------------------------------------------------|----------------------------------------------------------------------------------------------------------------------------------------------------------------------------------------------------------------------|-------------------------------------------------------------------------------------------------------------------------------------------|
| 1460251_at   | Fas (TNF receptor superfamily member)                | Fas           | 2.50 | renal system process /// apoptosis /// apoptosis /// apoptosis /// apoptosis /// activated T cell apoptosis /// activated T cell apoptosis /// inflammatory cell apoptosis /// inflammatory cell apoptosis /// transformed cell apoptosis /// immune response /// signal transduction /// induction of apoptosis by extracellular signals /// induction of apoptosis via death domain receptors /// induction of apoptosis via death domain receptors /// induction of apoptosis via death domain receptors /// response to toxin /// gene expression /// T cell homeostasis /// positive regulation of apoptosis /// negative regulation of apoptosis /// negative thymic T cell selection /// regulation of lymphocyte differentiation /// regulation of myeloid cell differentiation /// spleen development /// negative regulation of B cell activation /// protein homooligomerization /// response to glucocorticoid stimulus /// response to protein stimulus | receptor activity /// transmembrane receptor activity /// protein binding /// protein binding                                                                                                                        | extracellular region /// external side of plasma membrane /// cell surface /// membrane /// integral to membrane /// integral to membrane |
| 1441919_x_at | carnitine acetyltransferase                          | Crat          | 2.50 | lipid metabolic process /// fatty acid metabolic process /// transport                                                                                                                                                                                                                                                                                                                                                                                                                                                                                                                                                                                                                                                                                                                                                                                                                                                                                               | carnitine O-acetyltransferase activity /// acyltransferase activity /// transferase activity                                                                                                                         | mitochondrion /// mitochondrion /// mitochondrial inner membrane /// peroxisome /// endoplasmic reticulum /// membrane                    |
| 1417177_at   | galactokinase 1                                      | Galk1         | 2.49 | carbohydrate metabolic process /// galactose metabolic process /// galactose metabolic process /// metabolic process /// phosphorylation /// galactitol metabolic process /// carbohydrate phosphorylation                                                                                                                                                                                                                                                                                                                                                                                                                                                                                                                                                                                                                                                                                                                                                           | nucleotide binding /// galactokinase activity /// galactokinase activity /// protein binding /// ATP binding /// kinase activity /// transferase activity /// phosphotransferase activity, alcohol group as acceptor | cytoplasm                                                                                                                                 |
| 1417883_at   | glutathione S-transferase, theta 2                   | Gstt2         | 2.47 | glutathione metabolic process /// glutathione metabolic process                                                                                                                                                                                                                                                                                                                                                                                                                                                                                                                                                                                                                                                                                                                                                                                                                                                                                                      | glutathione transferase activity /// glutathione transferase activity /// transferase activity                                                                                                                       | nucleus /// cytoplasm                                                                                                                     |
| 1434170_at   | WD repeat domain 40B                                 | Wdr40b        | 2.47 | ---                                                                                                                                                                                                                                                                                                                                                                                                                                                                                                                                                                                                                                                                                                                                                                                                                                                                                                                                                                  | ---                                                                                                                                                                                                                  | ---                                                                                                                                       |
| 1437590_at   | RIKEN cDNA 4833409A17 gene                           | 4833409A17Rik | 2.47 | carotenoid biosynthetic process                                                                                                                                                                                                                                                                                                                                                                                                                                                                                                                                                                                                                                                                                                                                                                                                                                                                                                                                      | electron carrier activity /// oxidoreductase activity /// oxidoreductase activity, acting on paired donors, with incorporation or reduction of molecular oxygen /// FAD binding                                      | ---                                                                                                                                       |
| 1434109_at   | SH3 domain binding glutamic acid-rich protein like 2 | Sh3bgrl2      | 2.46 | ---                                                                                                                                                                                                                                                                                                                                                                                                                                                                                                                                                                                                                                                                                                                                                                                                                                                                                                                                                                  | ---                                                                                                                                                                                                                  | nucleus                                                                                                                                   |

|              |                                                                                                                                                                                                         |                                                    |      |                                                                                                                                                                                                                                                                                                                                                                                                                                                                                                                                                                                                                                                                                                                                                                                                                                                                     |                                                                                                                                                                                                                                                                                                                                                                                                                                                |                                                                                                                                                                        |
|--------------|---------------------------------------------------------------------------------------------------------------------------------------------------------------------------------------------------------|----------------------------------------------------|------|---------------------------------------------------------------------------------------------------------------------------------------------------------------------------------------------------------------------------------------------------------------------------------------------------------------------------------------------------------------------------------------------------------------------------------------------------------------------------------------------------------------------------------------------------------------------------------------------------------------------------------------------------------------------------------------------------------------------------------------------------------------------------------------------------------------------------------------------------------------------|------------------------------------------------------------------------------------------------------------------------------------------------------------------------------------------------------------------------------------------------------------------------------------------------------------------------------------------------------------------------------------------------------------------------------------------------|------------------------------------------------------------------------------------------------------------------------------------------------------------------------|
| 1436994_a_at | histone cluster 1, H1c                                                                                                                                                                                  | Hist1h1c                                           | 2.45 | neurotransmitter uptake /// regulation of the force of heart contraction /// neurological control of breathing /// nucleosome assembly /// nucleosome assembly /// transport /// ion transport /// cation transport /// potassium ion transport /// regulation of muscle contraction /// regulation of smooth muscle contraction /// regulation of striated muscle contraction /// metabolic process /// regulation of blood pressure /// adult locomotory behavior /// visual learning /// monovalent inorganic cation transport /// nucleosome positioning /// regulation of vasoconstriction /// sperm motility /// regulation of cellular pH /// locomotion /// negative regulation of heart contraction /// negative regulation of striated muscle contraction /// chromosome organization and biogenesis /// reduction of cytosolic calcium ion concentration | nucleotide binding /// DNA binding /// DNA binding /// DNA binding /// catalytic activity /// protein binding /// ATP binding /// monovalent inorganic cation transmembrane transporter activity /// ATPase activity, coupled to transmembrane movement of ions, phosphorylative mechanism /// hydrolase activity /// hydrolase activity, acting on acid anhydrides, catalyzing transmembrane movement of substances /// potassium ion binding | nucleosome /// nucleosome /// nucleus /// nucleus /// chromosome /// chromosome /// chromosome /// membrane /// integral to membrane /// sarcolemma                    |
| 1435084_at   | RIKEN cDNA C730049O14 gene                                                                                                                                                                              | C730049O14Rik                                      | 2.45 | ---                                                                                                                                                                                                                                                                                                                                                                                                                                                                                                                                                                                                                                                                                                                                                                                                                                                                 | ---                                                                                                                                                                                                                                                                                                                                                                                                                                            | ---                                                                                                                                                                    |
| 1434642_at   | hydroxysteroid (17-beta) dehydrogenase 11                                                                                                                                                               | Hsd17b11                                           | 2.44 | steroid biosynthetic process /// androgen catabolic process /// metabolic process /// metabolic process /// lipid biosynthetic process                                                                                                                                                                                                                                                                                                                                                                                                                                                                                                                                                                                                                                                                                                                              | catalytic activity /// estradiol 17-beta-dehydrogenase activity /// binding /// steroid dehydrogenase activity /// oxidoreductase activity                                                                                                                                                                                                                                                                                                     | extracellular region /// cytoplasm                                                                                                                                     |
| 1435902_at   | nudix (nucleoside diphosphate linked moiety X)-type motif 18                                                                                                                                            | Nudt18                                             | 2.42 | ---                                                                                                                                                                                                                                                                                                                                                                                                                                                                                                                                                                                                                                                                                                                                                                                                                                                                 | magnesium ion binding /// hydrolase activity /// manganese ion binding /// metal ion binding                                                                                                                                                                                                                                                                                                                                                   | ---                                                                                                                                                                    |
| 1415776_at   | aldehyde dehydrogenase family 3, subfamily A2                                                                                                                                                           | Aldh3a2                                            | 2.42 | aldehyde metabolic process /// metabolic process                                                                                                                                                                                                                                                                                                                                                                                                                                                                                                                                                                                                                                                                                                                                                                                                                    | aldehyde dehydrogenase (NAD) activity /// aldehyde dehydrogenase [NAD(P)+] activity /// oxidoreductase activity                                                                                                                                                                                                                                                                                                                                | mitochondrial inner membrane /// endoplasmic reticulum /// endoplasmic reticulum membrane /// membrane /// integral to membrane /// integral to membrane               |
| 1420603_s_at | retinoic acid early transcript 1, alpha /// retinoic acid early transcript beta /// retinoic acid early transcript gamma /// retinoic acid early transcript delta /// retinoic acid early transcript 1E | Raet1a /// Raet1b /// Raet1c /// Raet1d /// Raet1e | 2.42 | positive regulation of immune response to tumor cell /// immune response /// antigen processing and presentation /// positive regulation of interferon-gamma production /// positive regulation of natural killer cell activation /// susceptibility to natural killer cell mediated cytotoxicity /// positive regulation of macrophage activation /// positive regulation of nitric oxide biosynthetic process                                                                                                                                                                                                                                                                                                                                                                                                                                                     | natural killer cell lectin-like receptor binding                                                                                                                                                                                                                                                                                                                                                                                               | plasma membrane /// membrane /// anchored to membrane /// anchored to external side of plasma membrane /// anchored to plasma membrane /// anchored to plasma membrane |
| 1424869_at   | dehydrogenase/reductase (SDR family) member 7B                                                                                                                                                          | Dhrs7b                                             | 2.41 | metabolic process                                                                                                                                                                                                                                                                                                                                                                                                                                                                                                                                                                                                                                                                                                                                                                                                                                                   | catalytic activity /// binding /// oxidoreductase activity                                                                                                                                                                                                                                                                                                                                                                                     | peroxisome /// peroxisomal membrane /// membrane /// integral to membrane                                                                                              |
| 1426146_a_at | choline phosphotransferase 1                                                                                                                                                                            | Chpt1                                              | 2.41 | phosphatidylcholine biosynthetic process /// platelet activating factor biosynthetic process /// apoptosis /// phospholipid biosynthetic process /// regulation of apoptosis /// negative regulation of apoptosis /// negative regulation of caspase activity                                                                                                                                                                                                                                                                                                                                                                                                                                                                                                                                                                                                       | magnesium ion binding /// diacylglycerol cholinephosphotransferase activity /// diacylglycerol cholinephosphotransferase activity /// transferase activity /// phosphotransferase activity, for other substituted phosphate groups /// manganese ion binding /// metal ion binding                                                                                                                                                             | Golgi membrane /// cytoplasm /// Golgi apparatus /// membrane /// integral to membrane /// integral to membrane                                                        |
| 1429399_at   | ring finger protein 125                                                                                                                                                                                 | Rnf125                                             | 2.41 | ubiquitin cycle /// immune response                                                                                                                                                                                                                                                                                                                                                                                                                                                                                                                                                                                                                                                                                                                                                                                                                                 | protein binding /// zinc ion binding /// ligase activity /// metal ion binding                                                                                                                                                                                                                                                                                                                                                                 | intracellular                                                                                                                                                          |

|              |                                                                              |          |      |                                                                                                                                                                                                                                                             |                                                                                                                                                                                                                                                                                                                                                                                                                                                                                                                               |                                                                                                                          |
|--------------|------------------------------------------------------------------------------|----------|------|-------------------------------------------------------------------------------------------------------------------------------------------------------------------------------------------------------------------------------------------------------------|-------------------------------------------------------------------------------------------------------------------------------------------------------------------------------------------------------------------------------------------------------------------------------------------------------------------------------------------------------------------------------------------------------------------------------------------------------------------------------------------------------------------------------|--------------------------------------------------------------------------------------------------------------------------|
| 1424133_at   | transmembrane protein 98                                                     | Tmem98   | 2.41 | ---                                                                                                                                                                                                                                                         | ---                                                                                                                                                                                                                                                                                                                                                                                                                                                                                                                           | extracellular space /// endoplasmic reticulum /// membrane /// integral to membrane                                      |
| 1419104_at   | abhydrolase domain containing 6                                              | Abhd6    | 2.39 | ---                                                                                                                                                                                                                                                         | catalytic activity /// hydrolase activity                                                                                                                                                                                                                                                                                                                                                                                                                                                                                     | membrane /// integral to membrane /// integral to membrane                                                               |
| 1422438_at   | epoxide hydrolase 1, microsomal                                              | Ephx1    | 2.39 | xenobiotic metabolic process /// response to toxin /// aromatic compound catabolic process                                                                                                                                                                  | catalytic activity /// epoxide hydrolase activity /// hydrolase activity /// cis-stilbene-oxide hydrolase activity                                                                                                                                                                                                                                                                                                                                                                                                            | extracellular space /// endoplasmic reticulum /// microsome /// membrane /// integral to membrane                        |
| 1451798_at   | interleukin 1 receptor antagonist                                            | Il1rn    | 2.39 | lipid metabolic process /// inflammatory response /// immune response /// cell surface receptor linked signal transduction /// insulin secretion                                                                                                            | receptor activity /// interleukin-1 receptor binding /// interleukin-1 receptor antagonist activity                                                                                                                                                                                                                                                                                                                                                                                                                           | extracellular region /// cytoplasm /// integral to plasma membrane                                                       |
| 1433898_at   | Expressed sequence AV025504                                                  | AV025504 | 2.39 | ---                                                                                                                                                                                                                                                         | ---                                                                                                                                                                                                                                                                                                                                                                                                                                                                                                                           | ---                                                                                                                      |
| 1415932_x_at | ATPase, class II, type 9A                                                    | Atp9a    | 2.39 | transport /// cation transport /// metabolic process /// phospholipid transport                                                                                                                                                                             | nucleotide binding /// magnesium ion binding /// catalytic activity /// phospholipid-translocating ATPase activity /// ATP binding /// ATPase activity, coupled to transmembrane movement of ions, phosphorylative mechanism /// hydrolase activity /// metal ion binding                                                                                                                                                                                                                                                     | membrane /// integral to membrane /// integral to membrane                                                               |
| 1418321_at   | dodecenoyl-Coenzyme A delta isomerase (3,2 trans-enoyl-Coenzyme A isomerase) | Dci      | 2.38 | lipid metabolic process /// fatty acid metabolic process /// fatty acid beta-oxidation /// metabolic process                                                                                                                                                | catalytic activity /// dodecenoyl-CoA delta-isomerase activity /// dodecenoyl-CoA delta-isomerase activity /// isomerase activity                                                                                                                                                                                                                                                                                                                                                                                             | mitochondrion /// mitochondrion /// mitochondrion /// mitochondrial inner membrane /// mitochondrial matrix              |
| 1455267_at   | estrogen-related receptor gamma                                              | Esrrg    | 2.36 | transcription /// regulation of transcription, DNA-dependent /// regulation of transcription, DNA-dependent /// regulation of transcription, DNA-dependent /// multicellular organismal development /// positive regulation of transcription, DNA-dependent | DNA binding /// DNA binding /// DNA binding /// transcription factor activity /// transcription factor activity /// steroid hormone receptor activity /// receptor activity /// receptor activity /// ligand-dependent nuclear receptor activity /// ligand-dependent nuclear receptor activity /// steroid binding /// calmodulin binding /// zinc ion binding /// tRNA-pseudouridine synthase activity /// transcription activator activity /// sequence-specific DNA binding /// metal ion binding /// AF-2 domain binding | nucleus /// nucleus                                                                                                      |
| 1453836_a_at | monoglyceride lipase                                                         | Mgl1     | 2.36 | ---                                                                                                                                                                                                                                                         | catalytic activity /// carboxylesterase activity /// hydrolase activity /// acylglycerol lipase activity                                                                                                                                                                                                                                                                                                                                                                                                                      | ---                                                                                                                      |
| 1418181_at   | protein tyrosine phosphatase 4a3                                             | Ptp4a3   | 2.36 | protein amino acid dephosphorylation /// dephosphorylation                                                                                                                                                                                                  | phosphoprotein phosphatase activity /// protein tyrosine phosphatase activity /// hydrolase activity /// phosphoric monoester hydrolase activity                                                                                                                                                                                                                                                                                                                                                                              | endosome /// early endosome /// plasma membrane /// membrane                                                             |
| 1420657_at   | uncoupling protein 3 (mitochondrial, proton carrier)                         | Ucp3     | 2.35 | response to superoxide /// response to hypoxia /// fatty acid metabolic process /// transport /// mitochondrial transport                                                                                                                                   | transporter activity /// binding /// oxidative phosphorylation uncoupler activity                                                                                                                                                                                                                                                                                                                                                                                                                                             | mitochondrion /// mitochondrion /// mitochondrion /// mitochondrial inner membrane /// membrane /// integral to membrane |
| 1418210_at   | profilin 2                                                                   | Pfn2     | 2.35 | cytoskeleton organization and biogenesis /// actin cytoskeleton organization and biogenesis                                                                                                                                                                 | actin binding /// protein binding /// protein binding                                                                                                                                                                                                                                                                                                                                                                                                                                                                         | cytoplasm /// cytoskeleton /// actin cytoskeleton                                                                        |
| 1428559_at   | 3-ketodihydrospingosine reductase                                            | Kdsr     | 2.34 | metabolic process /// cellular process                                                                                                                                                                                                                      | catalytic activity /// binding /// oxidoreductase activity /// 3-dehydrospinganine reductase activity                                                                                                                                                                                                                                                                                                                                                                                                                         | extracellular space /// endoplasmic reticulum /// endoplasmic reticulum membrane /// membrane /// integral to membrane   |

|              |                                                                       |               |      |                                                                                                                                                                                                                                                               |                                                                                                                                                                                                                                                                                                                                                             |                                                                                                                                                                                                                                                              |
|--------------|-----------------------------------------------------------------------|---------------|------|---------------------------------------------------------------------------------------------------------------------------------------------------------------------------------------------------------------------------------------------------------------|-------------------------------------------------------------------------------------------------------------------------------------------------------------------------------------------------------------------------------------------------------------------------------------------------------------------------------------------------------------|--------------------------------------------------------------------------------------------------------------------------------------------------------------------------------------------------------------------------------------------------------------|
| 1415802_at   | solute carrier family 16 (monocarboxylic acid transporters), member 1 | Slc16a1       | 2.34 | transport /// organic anion transport                                                                                                                                                                                                                         | transporter activity /// protein binding /// symporter activity /// secondary active monocarboxylate transmembrane transporter activity /// transmembrane transporter activity                                                                                                                                                                              | plasma membrane /// integral to plasma membrane /// membrane /// integral to membrane                                                                                                                                                                        |
| 1425948_a_at | solute carrier family 25, member 30                                   | Slc25a30      | 2.34 | transport /// mitochondrial transport                                                                                                                                                                                                                         | transporter activity /// binding                                                                                                                                                                                                                                                                                                                            | mitochondrion /// mitochondrial inner membrane /// membrane /// integral to membrane                                                                                                                                                                         |
| 1426785_s_at | monoglyceride lipase                                                  | Mgll          | 2.33 | ---                                                                                                                                                                                                                                                           | catalytic activity /// carboxylesterase activity /// hydrolase activity /// acylglycerol lipase activity                                                                                                                                                                                                                                                    | ---                                                                                                                                                                                                                                                          |
| 1429947_a_at | Z-DNA binding protein 1                                               | Zbp1          | 2.33 | ---                                                                                                                                                                                                                                                           | DNA binding /// left-handed Z-DNA binding /// RNA binding /// double-stranded RNA adenosine deaminase activity                                                                                                                                                                                                                                              | ---                                                                                                                                                                                                                                                          |
| 1416488_at   | cyclin G2                                                             | Ccng2         | 2.33 | cell cycle /// mitosis /// cell division /// regulation of cell cycle                                                                                                                                                                                         | cyclin-dependent protein kinase regulator activity                                                                                                                                                                                                                                                                                                          | nucleus /// cytoplasm                                                                                                                                                                                                                                        |
| 1418438_at   | fatty acid binding protein 2,                                         | Fabp2         | 2.32 | transport                                                                                                                                                                                                                                                     | transporter activity /// binding /// lipid binding                                                                                                                                                                                                                                                                                                          | cytoplasm                                                                                                                                                                                                                                                    |
| 1427126_at   | heat shock protein 1B                                                 | Hspa1b        | 2.32 | telomere maintenance /// DNA repair /// anti-apoptosis /// response to stress /// response to heat /// negative regulation of caspase activity                                                                                                                | nucleotide binding /// protein binding /// ATP binding                                                                                                                                                                                                                                                                                                      | ---                                                                                                                                                                                                                                                          |
| 1418073_at   | acyl-CoA thioesterase 9                                               | Acot9         | 2.31 | ---                                                                                                                                                                                                                                                           | carboxylesterase activity /// palmitoyl-CoA hydrolase activity /// acyl-CoA thioesterase activity /// hydrolase activity                                                                                                                                                                                                                                    | mitochondrion /// mitochondrion                                                                                                                                                                                                                              |
| 1450391_a_at | monoglyceride lipase                                                  | Mgll          | 2.31 | ---                                                                                                                                                                                                                                                           | catalytic activity /// carboxylesterase activity /// hydrolase activity /// acylglycerol lipase activity                                                                                                                                                                                                                                                    | ---                                                                                                                                                                                                                                                          |
| 1417879_at   | neuron derived neurotrophic factor                                    | Nenf          | 2.31 | positive regulation of MAPKKK cascade                                                                                                                                                                                                                         | growth factor activity /// heme binding /// transition metal ion binding                                                                                                                                                                                                                                                                                    | extracellular region /// extracellular space /// extracellular space                                                                                                                                                                                         |
| 1425409_at   | cholinergic receptor, nicotinic, alpha polypeptide 2 (neuronal)       | Chrna2        | 2.30 | transport /// transport /// ion transport /// ion transport /// signal transduction /// synaptic transmission /// synaptic transmission, cholinergic                                                                                                          | receptor activity /// nicotinic acetylcholine-activated cation-selective channel activity /// GABA-A receptor activity /// ion channel activity /// ion channel activity /// extracellular ligand-gated ion channel activity /// extracellular ligand-gated ion channel activity /// acetylcholine receptor activity /// neurotransmitter receptor activity | extracellular space /// membrane fraction /// plasma membrane /// nicotinic acetylcholine-gated receptor-channel complex /// membrane /// membrane /// integral to membrane /// integral to membrane /// cell junction /// synapse /// postsynaptic membrane |
| 1455025_at   | progesterin and adipoQ receptor family member IX                      | Paqr9         | 2.27 | ---                                                                                                                                                                                                                                                           | receptor activity                                                                                                                                                                                                                                                                                                                                           | membrane /// integral to membrane                                                                                                                                                                                                                            |
| 1437496_at   | RIKEN cDNA 9330129D05 gene                                            | 9330129D05Rik | 2.26 | metabolic process /// oxidation reduction                                                                                                                                                                                                                     | acyl-CoA dehydrogenase activity /// acyl-CoA dehydrogenase activity /// electron carrier activity /// oxidoreductase activity /// oxidoreductase activity, acting on the CH-CH group of donors /// FAD binding                                                                                                                                              | extracellular space                                                                                                                                                                                                                                          |
| 1435446_a_at | choline phosphotransferase 1                                          | Chpt1         | 2.25 | phosphatidylcholine biosynthetic process /// platelet activating factor biosynthetic process /// apoptosis /// phospholipid biosynthetic process /// regulation of apoptosis /// negative regulation of apoptosis /// negative regulation of caspase activity | magnesium ion binding /// diacylglycerol cholinephosphotransferase activity /// diacylglycerol cholinephosphotransferase activity /// transferase activity /// phosphotransferase activity, for other substituted phosphate groups /// manganese ion binding /// metal ion binding                                                                          | Golgi membrane /// cytoplasm /// Golgi apparatus /// membrane /// integral to membrane /// integral to membrane                                                                                                                                              |



|              |                                                          |               |      |                                                                                                                  |                                                                                                                                                                                                                                                                                                                                                   |                                                                                                                      |
|--------------|----------------------------------------------------------|---------------|------|------------------------------------------------------------------------------------------------------------------|---------------------------------------------------------------------------------------------------------------------------------------------------------------------------------------------------------------------------------------------------------------------------------------------------------------------------------------------------|----------------------------------------------------------------------------------------------------------------------|
| 1428372_at   | suppression of tumorigenicity 5                          | St5           | 2.25 | ---                                                                                                              | hydrogen ion transmembrane transporter activity proton-transporting two-sector ATPase complex                                                                                                                                                                                                                                                     |                                                                                                                      |
| 1450061_at   | ectodermal-neural cortex 1                               | Enc1          | 2.24 | ubiquitin cycle /// multicellular organismal development                                                         | actin binding /// protein binding                                                                                                                                                                                                                                                                                                                 | cytoplasm /// cytoskeleton                                                                                           |
| 1459686_at   | ---                                                      | ---           | 2.24 | ---                                                                                                              | ---                                                                                                                                                                                                                                                                                                                                               | ---                                                                                                                  |
| 1457213_a_at | diacylglycerol kinase, eta                               | Dgkh          | 2.24 | activation of protein kinase C activity /// intracellular signaling cascade /// diacylglycerol metabolic process | diacylglycerol kinase activity /// diacylglycerol kinase activity /// protein binding /// zinc ion binding /// protein homodimerization activity                                                                                                                                                                                                  | cytoplasm /// endosome                                                                                               |
| 1432562_at   | RIKEN cDNA 1110006G14 gene                               | 1110006G14Rik | 2.23 | ---                                                                                                              | ---                                                                                                                                                                                                                                                                                                                                               | ---                                                                                                                  |
| 1434671_at   | RIKEN cDNA B230337E12 gene                               | B230337E12Rik | 2.21 | ---                                                                                                              | ---                                                                                                                                                                                                                                                                                                                                               | ---                                                                                                                  |
| 1424904_at   | RIKEN cDNA 1300010F03 gene                               | 1300010F03Rik | 2.19 | ---                                                                                                              | nucleotide binding /// nucleotide binding /// ATP binding /// hydrolase activity /// ATPase activity /// nucleoside-triphosphatase activity                                                                                                                                                                                                       | extracellular space /// mitochondrion                                                                                |
| 1434599_a_at | tight junction protein 2                                 | Tjp2          | 2.19 | ---                                                                                                              | protein binding /// protein binding                                                                                                                                                                                                                                                                                                               | nucleus /// plasma membrane /// plasma membrane /// tight junction /// tight junction /// membrane /// cell junction |
| 1425120_x_at | RIKEN cDNA 1810023F06 gene                               | 1810023F06Rik | 2.19 | ---                                                                                                              | ---                                                                                                                                                                                                                                                                                                                                               | extracellular space /// integral to membrane                                                                         |
| 1436038_a_at | phosphatidylinositol glycan anchor biosynthesis, class P | Pigp          | 2.18 | GPI anchor biosynthetic process                                                                                  | transferase activity /// transferase activity, transferring glycosyl groups /// phosphatidylinositol N-acetylglucosaminyltransferase activity                                                                                                                                                                                                     | membrane /// integral to membrane /// integral to membrane                                                           |
| 1429570_at   | mixed lineage kinase domain-like                         | Mlk1          | 2.15 | protein amino acid phosphorylation                                                                               | protein kinase activity /// ATP binding                                                                                                                                                                                                                                                                                                           | ---                                                                                                                  |
| 1450018_s_at | solute carrier family 25, member 30                      | Slc25a30      | 2.15 | transport /// mitochondrial transport                                                                            | transporter activity /// binding                                                                                                                                                                                                                                                                                                                  | mitochondrion /// mitochondrial inner membrane /// membrane /// integral to membrane                                 |
| 1426857_a_at | hydroxysteroid dehydrogenase like 2                      | Hsd12         | 2.15 | metabolic process                                                                                                | catalytic activity /// binding /// sterol carrier activity /// sterol carrier activity /// oxidoreductase activity                                                                                                                                                                                                                                | mitochondrion                                                                                                        |
| 1437073_x_at | expressed sequence AV025504                              | AV025504      | 2.15 | ---                                                                                                              | ---                                                                                                                                                                                                                                                                                                                                               | ---                                                                                                                  |
| 1425109_at   | solute carrier family 44, member 3                       | Slc44a3       | 2.14 | ---                                                                                                              | ---                                                                                                                                                                                                                                                                                                                                               | membrane /// integral to membrane                                                                                    |
| 1448361_at   | tetratricopeptide repeat domain 3                        | Ttc3          | 2.14 | ---                                                                                                              | binding /// protein binding /// zinc ion binding /// metal ion binding                                                                                                                                                                                                                                                                            | ---                                                                                                                  |
| 1455936_a_at | RNA binding protein gene with multiple splicing          | Rbpms         | 2.13 | ---                                                                                                              | nucleotide binding /// nucleic acid binding /// RNA binding                                                                                                                                                                                                                                                                                       | ---                                                                                                                  |
| 1451421_a_at | rogdi homolog (Drosophila)                               | Rogdi         | 2.12 | positive regulation of cell proliferation /// hemopoiesis                                                        | ---                                                                                                                                                                                                                                                                                                                                               | ---                                                                                                                  |
| 1420541_at   | retinol dehydrogenase 16                                 | Rdh16         | 2.12 | metabolic process /// metabolic process                                                                          | catalytic activity /// retinol dehydrogenase activity /// binding /// oxidoreductase activity                                                                                                                                                                                                                                                     | extracellular space /// microsome                                                                                    |
| 1419435_at   | aldehyde oxidase 1                                       | Aox1          | 2.12 | oxidation reduction                                                                                              | catalytic activity /// aldehyde oxidase activity /// aldehyde oxidase activity /// iron ion binding /// electron carrier activity /// electron carrier activity /// oxidoreductase activity /// molybdenum ion binding /// metal ion binding /// FAD binding /// NAD binding /// iron-sulfur cluster binding /// 2 iron, 2 sulfur cluster binding | cytoplasm                                                                                                            |
| 1445597_s_at | HRAS like suppressor 3                                   | Hrasls3       | 2.11 | cell cycle /// negative regulation of cell cycle                                                                 | ---                                                                                                                                                                                                                                                                                                                                               | membrane /// integral to membrane                                                                                    |

|              |                                                                 |          |      |                                                                                                                                                                                                                                                                                                                       |                                                                                                                                                                                                                                                                                                                                    |                                                                                                       |
|--------------|-----------------------------------------------------------------|----------|------|-----------------------------------------------------------------------------------------------------------------------------------------------------------------------------------------------------------------------------------------------------------------------------------------------------------------------|------------------------------------------------------------------------------------------------------------------------------------------------------------------------------------------------------------------------------------------------------------------------------------------------------------------------------------|-------------------------------------------------------------------------------------------------------|
| 1447602_x_at | sulfatase 2                                                     | Sulf2    | 2.11 | sulfur metabolic process /// metabolic process /// catalytic activity /// arylsulfatase activity /// metabolic process                                                                                                                                                                                                | calcium ion binding /// N-acetylglucosamine-6-sulfatase activity /// N-acetylglucosamine-6-sulfuric ester hydrolase activity /// sulfuric ester hydrolase activity /// hydrolase activity /// phosphoric monoester hydrolase activity /// metal ion binding                                                                        | extracellular space /// endoplasmic reticulum /// Golgi apparatus /// cell surface /// cell surface   |
| 1421848_at   | solute carrier family 22 (organic cation transporter), member 5 | Slc22a5  | 2.11 | transport /// ion transport /// sodium ion transport /// mitochondrion organization and biogenesis /// adult heart development /// locomotory behavior /// carnitine metabolic process /// quaternary ammonium group transport /// carnitine transport /// carnitine transport /// reproductive structure development | nucleotide binding /// transporter activity /// ATP binding /// ion transmembrane transporter activity /// carnitine transporter activity /// carnitine transporter activity /// symporter activity /// quaternary ammonium group transmembrane transporter activity /// transmembrane transporter activity /// sodium ion binding | membrane /// membrane /// integral to membrane /// integral to membrane /// apical plasma membrane    |
| 1429859_a_at | ADP-ribosylation factor-like 2 binding protein                  | Arl2bp   | 2.11 | ---                                                                                                                                                                                                                                                                                                                   | small GTPase regulator activity /// GTPase activator activity /// protein binding                                                                                                                                                                                                                                                  | soluble fraction /// cytoplasm /// mitochondrion /// mitochondrial intermembrane space /// centrosome |
| 1460196_at   | carbonyl reductase 1                                            | Cbr1     | 2.11 | metabolic process                                                                                                                                                                                                                                                                                                     | catalytic activity /// carbonyl reductase (NADPH) activity /// carbonyl reductase (NADPH) activity /// binding /// oxidoreductase activity                                                                                                                                                                                         | cytoplasm                                                                                             |
| 1426452_a_at | RAB30, member RAS oncogene family                               | Rab30    | 2.10 | small GTPase mediated signal transduction /// protein transport                                                                                                                                                                                                                                                       | nucleotide binding /// GTP binding                                                                                                                                                                                                                                                                                                 | plasma membrane /// membrane                                                                          |
| 1448700_at   | G0/G1 switch gene 2                                             | G0s2     | 2.10 | cell cycle                                                                                                                                                                                                                                                                                                            | ---                                                                                                                                                                                                                                                                                                                                | integral to membrane                                                                                  |
| 1450264_a_at | choline kinase alpha                                            | Chka     | 2.09 | phosphatidylcholine biosynthetic process                                                                                                                                                                                                                                                                              | choline kinase activity /// choline kinase activity /// cholinesterase activity /// ethanolamine kinase activity /// kinase activity /// transferase activity /// protein homodimerization activity                                                                                                                                | cytoplasm                                                                                             |
| 1421878_at   | mitogen activated protein kinase 9                              | Mapk9    | 2.09 | protein amino acid phosphorylation /// JNK cascade                                                                                                                                                                                                                                                                    | nucleotide binding /// protein kinase activity /// protein serine/threonine kinase activity /// JUN kinase activity /// MAP kinase activity /// protein binding /// ATP binding /// kinase activity /// transferase activity                                                                                                       | nucleus                                                                                               |
| 1438001_x_at | receptor accessory protein 5                                    | Reep5    | 2.09 | phosphoenolpyruvate-dependent sugar phosphotransferase system                                                                                                                                                                                                                                                         | receptor activity /// sugar:hydrogen symporter activity /// protein binding                                                                                                                                                                                                                                                        | membrane /// integral to membrane                                                                     |
| 1420836_at   | solute carrier family 25, member 30                             | Slc25a30 | 2.08 | transport /// mitochondrial transport                                                                                                                                                                                                                                                                                 | transporter activity /// binding                                                                                                                                                                                                                                                                                                   | mitochondrion /// mitochondrial inner membrane /// membrane /// integral to membrane                  |

|              |                                                                         |         |      |                                                                                                                                                                                                                                                                                                                                                                                                                                                                                                                                              |                                                                                                                                                                                                                                                                        |                                                                                                                                                                                                                                |
|--------------|-------------------------------------------------------------------------|---------|------|----------------------------------------------------------------------------------------------------------------------------------------------------------------------------------------------------------------------------------------------------------------------------------------------------------------------------------------------------------------------------------------------------------------------------------------------------------------------------------------------------------------------------------------------|------------------------------------------------------------------------------------------------------------------------------------------------------------------------------------------------------------------------------------------------------------------------|--------------------------------------------------------------------------------------------------------------------------------------------------------------------------------------------------------------------------------|
| 1422076_at   | acyl-CoA thioesterase 4                                                 | Acot4   | 2.08 | very-long-chain fatty acid metabolic process /// long-chain fatty acid metabolic process /// succinyl-CoA metabolic process /// succinyl-CoA metabolic process /// lipid metabolic process /// acyl-CoA metabolic process /// acyl-CoA metabolic process /// saturated monocarboxylic acid metabolic process /// unsaturated monocarboxylic acid metabolic process /// dicarboxylic acid metabolic process /// dicarboxylic acid metabolic process /// short-chain fatty acid metabolic process /// short-chain fatty acid metabolic process | carboxylesterase activity /// palmitoyl-CoA hydrolase activity /// acyl-CoA thioesterase activity /// acyl-CoA thioesterase activity /// hydrolase activity                                                                                                            | peroxisome /// peroxisome /// peroxisome                                                                                                                                                                                       |
| 1456769_at   | dual specificity phosphatase 3 (vaccinia virus phosphatase VHI-related) | Dusp3   | 2.08 | protein amino acid dephosphorylation /// dephosphorylation                                                                                                                                                                                                                                                                                                                                                                                                                                                                                   | phosphoprotein phosphatase activity /// protein tyrosine phosphatase activity /// protein tyrosine/serine/threonine phosphatase activity /// protein tyrosine/serine/threonine phosphatase activity /// hydrolase activity /// phosphoric monoester hydrolase activity | ---                                                                                                                                                                                                                            |
| 1427005_at   | polo-like kinase 2 (Drosophila)                                         | Plk2    | 2.07 | mitotic cell cycle /// protein amino acid phosphorylation /// positive regulation of I-kappaB kinase/NF-kappaB cascade                                                                                                                                                                                                                                                                                                                                                                                                                       | nucleotide binding /// protein kinase activity /// protein serine/threonine kinase activity /// signal transducer activity /// protein binding /// ATP binding /// kinase activity /// transferase activity                                                            | ---                                                                                                                                                                                                                            |
| 1421116_a_at | reticulon 4                                                             | Rtn4    | 2.06 | angiogenesis /// nervous system development /// negative regulation of anti-apoptosis /// regulation of cell migration /// negative regulation of axon extension                                                                                                                                                                                                                                                                                                                                                                             | protein binding                                                                                                                                                                                                                                                        | nuclear envelope /// endoplasmic reticulum /// endoplasmic reticulum /// endoplasmic reticulum membrane /// membrane /// integral to membrane /// integral to endoplasmic reticulum membrane /// cell projection /// cell soma |
| 1416590_a_at | RAB34, member of RAS oncogene family                                    | Rab34   | 2.06 | transport /// endocytosis /// small GTPase mediated signal transduction /// protein transport                                                                                                                                                                                                                                                                                                                                                                                                                                                | nucleotide binding /// GTPase activity /// GTP binding /// guanyl nucleotide binding                                                                                                                                                                                   | ruffle /// cytoplasm /// early endosome /// Golgi apparatus                                                                                                                                                                    |
| 1435394_s_at | ras homolog gene family, member C                                       | Rhoc    | 2.06 | small GTPase mediated signal transduction /// negative regulation of neuron differentiation                                                                                                                                                                                                                                                                                                                                                                                                                                                  | nucleotide binding /// protein binding /// GTP binding                                                                                                                                                                                                                 | intracellular /// nucleus /// plasma membrane /// plasma membrane /// membrane                                                                                                                                                 |
| 1417449_at   | acyl-CoA thioesterase 8                                                 | Acot8   | 2.06 | acyl-CoA metabolic process /// acyl-CoA metabolic process /// peroxisome organization and biogenesis                                                                                                                                                                                                                                                                                                                                                                                                                                         | carboxylesterase activity /// palmitoyl-CoA hydrolase activity /// acyl-CoA thioesterase activity /// acyl-CoA thioesterase activity /// hydrolase activity /// choloyl-CoA hydrolase activity                                                                         | mitochondrion /// peroxisome /// peroxisome                                                                                                                                                                                    |
| 1436186_at   | E2F transcription factor 8                                              | E2f8    | 2.06 | transcription /// regulation of transcription, DNA-dependent /// cell cycle /// cell proliferation                                                                                                                                                                                                                                                                                                                                                                                                                                           | DNA binding /// DNA binding /// transcription factor activity /// identical protein binding /// protein homodimerization activity                                                                                                                                      | nucleus /// nucleus /// transcription factor complex                                                                                                                                                                           |
| 1455520_at   | protein phosphatase 2, regulatory subunit B (B56), gamma isoform        | Ppp2r5c | 2.06 | signal transduction                                                                                                                                                                                                                                                                                                                                                                                                                                                                                                                          | binding /// protein binding /// protein phosphatase type 2A regulator activity                                                                                                                                                                                         | protein phosphatase protein phosphatase type 2A complex /// nucleus /// cytoplasm                                                                                                                                              |

|              |                                                                 |          |      |                                                                                                                                                                                                                                                                                                                                                                                                                                                                                                                                                                                                                                                                                                                                                                                                                                                                                                                 |                                                                                                                                                                                                                                                                                                                                    |                                                                                                                                                                                                                                         |
|--------------|-----------------------------------------------------------------|----------|------|-----------------------------------------------------------------------------------------------------------------------------------------------------------------------------------------------------------------------------------------------------------------------------------------------------------------------------------------------------------------------------------------------------------------------------------------------------------------------------------------------------------------------------------------------------------------------------------------------------------------------------------------------------------------------------------------------------------------------------------------------------------------------------------------------------------------------------------------------------------------------------------------------------------------|------------------------------------------------------------------------------------------------------------------------------------------------------------------------------------------------------------------------------------------------------------------------------------------------------------------------------------|-----------------------------------------------------------------------------------------------------------------------------------------------------------------------------------------------------------------------------------------|
| 1437455_a_at | B-cell translocation gene 1, anti-proliferative                 | Btg1     | 2.04 | protein amino acid methylation /// spermatid development /// negative regulation of cell proliferation /// cellular process /// cell migration /// negative regulation of cell growth /// regulation of apoptosis /// regulation of apoptosis /// regulation of apoptosis /// positive regulation of catalytic activity /// regulation of transcription /// positive regulation of endothelial cell differentiation /// positive regulation of endothelial cell differentiation /// positive regulation of endothelial cell differentiation /// positive regulation of myoblast differentiation /// positive regulation of angiogenesis /// positive regulation of angiogenesis /// positive regulation of angiogenesis | transcription cofactor activity /// protein binding /// protein binding /// enzyme binding /// enzyme binding /// kinase binding                                                                                                                                                                                                   | nucleus /// nucleus /// nucleus /// cytoplasm /// cytoplasm /// cytoplasm                                                                                                                                                               |
| 1450395_at   | solute carrier family 22 (organic cation transporter), member 5 | Slc22a5  | 2.04 | transport /// ion transport /// sodium ion transport /// mitochondrion organization and biogenesis /// adult heart development /// locomotory behavior /// carnitine metabolic process /// quaternary ammonium group transport /// carnitine transport /// carnitine transport /// reproductive structure development                                                                                                                                                                                                                                                                                                                                                                                                                                                                                                                                                                                           | nucleotide binding /// transporter activity /// ATP binding /// ion transmembrane transporter activity /// carnitine transporter activity /// carnitine transporter activity /// symporter activity /// quaternary ammonium group transmembrane transporter activity /// transmembrane transporter activity /// sodium ion binding | membrane /// membrane /// integral to membrane /// integral to membrane /// apical plasma membrane                                                                                                                                      |
| 1424790_at   | solute carrier family 25, member 42                             | Slc25a42 | 2.04 | transport                                                                                                                                                                                                                                                                                                                                                                                                                                                                                                                                                                                                                                                                                                                                                                                                                                                                                                       | binding                                                                                                                                                                                                                                                                                                                            | mitochondrion /// mitochondrial inner membrane /// mitochondrial inner membrane /// membrane /// integral to membrane                                                                                                                   |
| 1451290_at   | microtubule-associated protein 1 light chain 3 alpha            | Map1lc3a | 2.04 | autophagic vacuole formation /// autophagic vacuole formation /// ubiquitin cycle /// autophagy                                                                                                                                                                                                                                                                                                                                                                                                                                                                                                                                                                                                                                                                                                                                                                                                                 | protein binding /// microtubule binding                                                                                                                                                                                                                                                                                            | cytoplasm /// cytoplasm /// autophagic vacuole /// autophagic vacuole /// autophagic vacuole /// microtubule /// microtubule /// endomembrane system /// membrane /// organelle membrane /// organelle membrane /// cytoplasmic vesicle |
| 1417268_at   | CD14 antigen                                                    | Cd14     | 2.04 | response to molecule of bacterial origin /// inflammatory response /// immune response                                                                                                                                                                                                                                                                                                                                                                                                                                                                                                                                                                                                                                                                                                                                                                                                                          | protein binding                                                                                                                                                                                                                                                                                                                    | extracellular space /// plasma membrane /// membrane /// anchored to membrane /// membrane raft /// lipopolysaccharide receptor complex                                                                                                 |
| 1429786_a_at | ZW10 interactor                                                 | Zwint    | 2.04 | cell cycle /// mitosis /// cell division                                                                                                                                                                                                                                                                                                                                                                                                                                                                                                                                                                                                                                                                                                                                                                                                                                                                        | ---                                                                                                                                                                                                                                                                                                                                | chromosome, pericentric region /// nucleus                                                                                                                                                                                              |
| 1424835_at   | glutathione S-transferase, mu 4                                 | Gstm4    | 2.03 | metabolic process /// nitrobenzene metabolic process /// xenobiotic catabolic process                                                                                                                                                                                                                                                                                                                                                                                                                                                                                                                                                                                                                                                                                                                                                                                                                           | glutathione transferase activity /// glutathione transferase activity /// glutathione transferase activity /// transferase activity /// transferase activity                                                                                                                                                                       | cytosol                                                                                                                                                                                                                                 |

|              |                                                                                           |          |       |                                                                                                                                                                               |                                                                                                                                                                                                                                                       |                                                                                                                                                                 |
|--------------|-------------------------------------------------------------------------------------------|----------|-------|-------------------------------------------------------------------------------------------------------------------------------------------------------------------------------|-------------------------------------------------------------------------------------------------------------------------------------------------------------------------------------------------------------------------------------------------------|-----------------------------------------------------------------------------------------------------------------------------------------------------------------|
| 1416308_at   | UDP-glucose dehydrogenase                                                                 | Ugdh     | 2.03  | gastrulation with mouth forming second /// metabolic process /// oxidation reduction                                                                                          | catalytic activity /// UDP-glucose 6-dehydrogenase activity /// binding /// electron donor activity /// oxidoreductase activity /// oxidoreductase activity, acting on the CH-OH group of donors, NAD or NADP as acceptor /// NAD binding             | ---                                                                                                                                                             |
| 1456642_x_at | S100 calcium binding protein A10 (calpactin)                                              | S100a10  | 2.02  | ---                                                                                                                                                                           | calcium ion binding                                                                                                                                                                                                                                   | ---                                                                                                                                                             |
| 1424282_at   | PET112-like (yeast)                                                                       | Pet112l  | 2.02  | translation /// translation                                                                                                                                                   | translation factor activity, nucleic acid binding /// transferase activity /// ligase activity /// ligase activity /// carbon-nitrogen ligase activity, with glutamine as amido-N-donor /// glutaminyl-tRNA synthase (glutamine-hydrolyzing) activity | mitochondrion /// mitochondrion /// mitochondrion                                                                                                               |
| 1423308_at   | trans-golgi network protein                                                               | Tgoln1   | 2.02  | ---                                                                                                                                                                           | protein binding                                                                                                                                                                                                                                       | Golgi apparatus /// Golgi apparatus /// trans-Golgi network /// plasma membrane /// membrane /// integral to membrane /// trans-Golgi network transport vesicle |
| 1447919_x_at | NADH dehydrogenase (ubiquinone) 1, alpha/beta subcomplex, 1                               | Ndufab1  | 2.01  | fatty acid biosynthetic process /// transport /// lipid biosynthetic process /// oxidation reduction                                                                          | acyl carrier activity /// phosphopantetheine binding /// cofactor binding                                                                                                                                                                             | mitochondrion /// mitochondrion /// mitochondrial respiratory chain                                                                                             |
| 1419382_a_at | dehydrogenase/reductase (SDR family) member 4                                             | Dhrs4    | 2.01  | metabolic process /// metabolic process /// retinal metabolic process                                                                                                         | retinal dehydrogenase activity /// catalytic activity /// carbonyl reductase (NADPH) activity /// carbonyl reductase (NADPH) activity /// binding /// oxidoreductase activity /// oxidoreductase activity                                             | mitochondrion /// peroxisome /// peroxisome                                                                                                                     |
| 1418652_at   | chemokine (C-X-C motif) ligand 9                                                          | Cxcl9    | 2.00  | inflammatory response /// immune response                                                                                                                                     | cytokine activity /// chemokine activity                                                                                                                                                                                                              | extracellular region /// extracellular space /// extracellular space                                                                                            |
| 1448927_at   | potassium intermediate/small conductance calcium-activated channel, subfamily N, member 2 | Kcnn2    | -2.01 | transport /// ion transport /// potassium ion transport                                                                                                                       | ion channel activity /// calmodulin binding /// calcium-activated potassium channel activity /// small conductance calcium-activated potassium channel activity /// small conductance calcium-activated potassium channel activity                    | membrane /// integral to membrane /// integral to membrane                                                                                                      |
| 1442331_at   | Aminolevulinic acid synthase 1                                                            | Alas1    | -2.02 | heme biosynthetic process<br>metabolic process<br>biosynthetic process<br>tetrapyrrole biosynthetic process                                                                   | catalytic activity<br>5-aminolevulinic acid synthase activity<br>acyltransferase activity<br>transferase activity<br>transferase activity, transferring nitrogenous groups<br>pyridoxal phosphate binding                                             | mitochondrion<br>mitochondrial matrix                                                                                                                           |
| 1449945_at   | peroxisome proliferative activated receptor, gamma, coactivator 1 beta                    | Ppargc1b | -2.03 | transcription /// regulation of transcription, DNA-dependent /// estrogen receptor signaling pathway /// positive regulation of transcription from RNA polymerase II promoter | nucleotide binding /// nucleic acid binding /// RNA binding /// protein binding /// ligand-dependent nuclear receptor transcription coactivator activity /// AF-2 domain binding                                                                      | nucleus /// nucleus                                                                                                                                             |

|              |                                                        |        |       |                                                                                                                                                                                                                                                            |                                                                                                                                                                                                                                                                                                                                  |                                                                                                                                                                   |
|--------------|--------------------------------------------------------|--------|-------|------------------------------------------------------------------------------------------------------------------------------------------------------------------------------------------------------------------------------------------------------------|----------------------------------------------------------------------------------------------------------------------------------------------------------------------------------------------------------------------------------------------------------------------------------------------------------------------------------|-------------------------------------------------------------------------------------------------------------------------------------------------------------------|
| 1452050_at   | calcium/calmodulin-dependent protein kinase ID         | Camk1d | -2.03 | protein amino acid phosphorylation /// regulation of apoptosis                                                                                                                                                                                             | nucleotide binding /// catalytic activity /// protein kinase activity /// protein serine/threonine kinase activity /// calmodulin-dependent protein kinase activity /// calmodulin-dependent protein kinase activity /// calcium ion binding /// calmodulin binding /// ATP binding /// kinase activity /// transferase activity | nucleus /// cytoplasm /// cytoplasm                                                                                                                               |
| 1423844_s_at | cystathionine beta-synthase                            | Cbs    | -2.03 | cysteine biosynthetic process from serine /// metabolic process /// amino acid biosynthetic process /// cysteine biosynthetic process via cystathionine /// cysteine biosynthetic process /// cysteine biosynthetic process /// regulation of JNK activity | catalytic activity /// cystathionine beta-synthase activity /// iron ion binding /// lyase activity /// pyridoxal phosphate binding /// metal ion binding                                                                                                                                                                        | nucleus /// cytoplasm                                                                                                                                             |
| 1432543_a_at | Kruppel-like factor 13                                 | Klf13  | -2.04 | transcription /// regulation of transcription, DNA-dependent /// transcription from RNA polymerase II promoter /// positive regulation of transcription from RNA polymerase II promoter                                                                    | nucleic acid binding /// DNA binding /// DNA binding /// DNA binding /// RNA polymerase II transcription factor activity /// RNA polymerase II transcription factor activity /// zinc ion binding /// metal ion binding                                                                                                          | intracellular /// nucleus                                                                                                                                         |
| 1419173_at   | aminoacylase 1                                         | Acy1   | -2.05 | proteolysis /// proteolysis /// amino acid metabolic process /// amino acid metabolic process                                                                                                                                                              | aminoacylase activity /// metalloproteinase activity /// metalloproteinase activity /// zinc ion binding /// hydrolase activity /// hydrolase activity /// metal ion binding /// protein dimerization activity                                                                                                                   | soluble fraction /// cytoplasm /// cytosol                                                                                                                        |
| 1448989_a_at | myosin IB                                              | Myo1b  | -2.05 | cytoskeleton organization and biogenesis                                                                                                                                                                                                                   | nucleotide binding /// motor activity /// actin binding /// calmodulin binding /// ATP binding                                                                                                                                                                                                                                   | cytoskeleton /// myosin complex                                                                                                                                   |
| 1418050_at   | glycosylphosphatidylinositol specific phospholipase D1 | Gpld1  | -2.05 | GPI anchor release                                                                                                                                                                                                                                         | glycosylphosphatidylinositol phospholipase D activity /// phospholipase D activity /// lipid transporter activity /// hydrolase activity                                                                                                                                                                                         | extracellular region /// proteinaceous extracellular matrix /// extracellular space                                                                               |
| 1458829_at   | Fructose biphosphatase 1                               | Fbp1   | -2.08 | carbohydrate metabolic process<br>gluconeogenesis                                                                                                                                                                                                          | catalytic activity<br>zinc ion binding<br>hydrolase activity<br>fructose 1,6-bisphosphate 1-phosphatase activity<br>phosphoric ester hydrolase activity<br>identical protein binding                                                                                                                                             | ---                                                                                                                                                               |
| 1420973_at   | AT rich interactive domain 5B (Mrf1 like)              | Arid5b | -2.08 | transcription /// regulation of transcription, DNA-dependent                                                                                                                                                                                               | DNA binding /// DNA binding                                                                                                                                                                                                                                                                                                      | intracellular /// intracellular /// nucleus                                                                                                                       |
| 1427631_x_at | major urinary protein 3                                | Mup3   | -2.08 | transport                                                                                                                                                                                                                                                  | transporter activity /// binding /// pheromone binding                                                                                                                                                                                                                                                                           | extracellular region                                                                                                                                              |
| 1424826_s_at | metastasis suppressor 1                                | Mtss1  | -2.08 | actin filament organization /// signal transduction /// nervous system development /// nervous system development /// muscle development /// actin filament polymerization /// filopodium formation                                                        | actin binding /// actin binding /// actin monomer binding /// receptor binding                                                                                                                                                                                                                                                   | cytoplasm /// cytoplasm /// cytoskeleton /// actin cytoskeleton                                                                                                   |
| 1418013_at   | camello-like 1                                         | Cml1   | -2.08 | gastrulation with mouth forming second /// negative regulation of cell adhesion /// multicellular organismal development /// gastrulation /// metabolic process                                                                                            | N-acetyltransferase activity /// N-acetyltransferase activity /// acyltransferase activity /// transferase activity                                                                                                                                                                                                              | extracellular space /// mitochondrial inner membrane /// endoplasmic reticulum /// Golgi apparatus /// membrane /// integral to membrane /// integral to membrane |

|            |                                                                              |         |       |                                                                                                                                                                                                                                                                                                                                                                                                                                                                                                                                                                          |                                                                                                                                                                                                                                                                                                                                                                                    |                                                                                                                                                                                                     |
|------------|------------------------------------------------------------------------------|---------|-------|--------------------------------------------------------------------------------------------------------------------------------------------------------------------------------------------------------------------------------------------------------------------------------------------------------------------------------------------------------------------------------------------------------------------------------------------------------------------------------------------------------------------------------------------------------------------------|------------------------------------------------------------------------------------------------------------------------------------------------------------------------------------------------------------------------------------------------------------------------------------------------------------------------------------------------------------------------------------|-----------------------------------------------------------------------------------------------------------------------------------------------------------------------------------------------------|
| 1443180_at | ERGIC and golgi 2                                                            | Ergic2  | -2.11 | transport<br>ER to Golgi vesicle-mediated transport<br>vesicle-mediated transport                                                                                                                                                                                                                                                                                                                                                                                                                                                                                        | protein binding                                                                                                                                                                                                                                                                                                                                                                    | endoplasmic reticulum<br>endoplasmic reticulum membrane<br>ER-Golgi intermediate compartment<br>Golgi apparatus<br>membrane<br>integral to membrane<br>ER-Golgi intermediate compartment membrane   |
| 1443603_at | Protein-L-isoaspartate (D-aspartate) O-methyltransferase domain containing 1 | Pcmdt1  | -2.12 | protein modification process                                                                                                                                                                                                                                                                                                                                                                                                                                                                                                                                             | protein-L-isoaspartate (D-aspartate) O-methyltransferase activity<br>methyltransferase activity<br>transferase activity                                                                                                                                                                                                                                                            | cytoplasm                                                                                                                                                                                           |
| 1421214_at | cytidine monophospho-N-acetylneuraminic acid hydroxylase                     | Cmah    | -2.13 | transport /// CMP-N-acetylneuraminic acid metabolic process /// oxidation reduction                                                                                                                                                                                                                                                                                                                                                                                                                                                                                      | iron ion binding /// ubiquinol-cytochrome-c reductase activity /// electron carrier activity /// oxidoreductase activity /// CMP-N-acetylneuraminic acid monooxygenase activity /// CMP-N-acetylneuraminic acid monooxygenase activity /// metal ion binding /// iron-sulfur cluster binding /// 2 iron, 2 sulfur cluster binding                                                  | cytoplasm /// cytoplasm /// endoplasmic reticulum /// membrane                                                                                                                                      |
| 1450717_at | angiogenin, ribonuclease A family, member 1                                  | Ang1    | -2.13 | angiogenesis /// angiogenesis /// angiogenesis /// response to hypoxia /// positive regulation of endothelial cell proliferation /// diacylglycerol biosynthetic process /// activation of phospholipase C activity /// multicellular organismal development /// central nervous system development /// rRNA transcription /// negative regulation of translation /// actin filament polymerization /// cell differentiation /// activation of phospholipase A2 /// negative regulation of smooth muscle cell proliferation /// positive regulation of protein secretion | nucleic acid binding /// RNA binding /// actin binding /// nuclease activity /// endonuclease activity /// pancreatic ribonuclease activity /// ribonuclease activity /// ribonuclease activity /// receptor binding /// copper ion binding /// protein binding /// heparin binding /// hydrolase activity                                                                         | extracellular region /// basal lamina /// extracellular space /// extracellular space /// nucleus /// nucleolus /// growth cone /// angiogenin-PR1 complex /// angiogenin-PR1 complex /// cell soma |
| 1435255_at | plexin B1                                                                    | Plxnb1  | -2.14 | signal transduction /// multicellular organismal development /// positive regulation of axonogenesis                                                                                                                                                                                                                                                                                                                                                                                                                                                                     | receptor activity /// protein binding                                                                                                                                                                                                                                                                                                                                              | intracellular /// membrane /// integral to membrane                                                                                                                                                 |
| 1424273_at | cytochrome P450, family 2, subfamily c, polypeptide 70                       | Cyp2c70 | -2.16 | oxidation reduction                                                                                                                                                                                                                                                                                                                                                                                                                                                                                                                                                      | monooxygenase activity /// iron ion binding /// electron carrier activity /// oxidoreductase activity /// oxidoreductase activity, acting on paired donors, with incorporation or reduction of molecular oxygen, reduced flavin or flavoprotein as one donor, and incorporation of one atom of oxygen /// heme binding /// metal ion binding /// unspecific monooxygenase activity | endoplasmic reticulum /// endoplasmic reticulum membrane /// microsome /// membrane                                                                                                                 |

|            |                                                                                                                                                                                                             |                                               |       |                                                                                                                                                                                                                                                                                                                                                     |                                                                                                                                                                                                                                                                                                                            |                                                                                                              |
|------------|-------------------------------------------------------------------------------------------------------------------------------------------------------------------------------------------------------------|-----------------------------------------------|-------|-----------------------------------------------------------------------------------------------------------------------------------------------------------------------------------------------------------------------------------------------------------------------------------------------------------------------------------------------------|----------------------------------------------------------------------------------------------------------------------------------------------------------------------------------------------------------------------------------------------------------------------------------------------------------------------------|--------------------------------------------------------------------------------------------------------------|
| 1418833_at | alanine-glyoxylate aminotransferase                                                                                                                                                                         | Agxt                                          | -2.18 | protein targeting to peroxisome /// metabolic process /// response to hormone stimulus /// glycine biosynthetic process, by transamination of glyoxylate /// pyruvate biosynthetic process /// glyoxylate metabolic process /// glyoxylate metabolic process /// oxalic acid secretion /// response to glucocorticoid stimulus /// response to cAMP | catalytic activity /// serine-pyruvate transaminase activity /// protein binding /// alanine-glyoxylate transaminase activity /// alanine-glyoxylate transaminase activity /// transaminase activity /// amino acid binding /// transferase activity /// pyridoxal phosphate binding /// protein homodimerization activity | mitochondrion /// mitochondrion /// mitochondrial matrix /// peroxisome /// peroxisome                       |
| 1437040_at | ethanolamine kinase 2                                                                                                                                                                                       | Etnk2                                         | -2.18 | hydrogen transport /// ATP synthesis coupled proton transport                                                                                                                                                                                                                                                                                       | hydrogen-exporting ATPase activity, phosphorylative mechanism /// kinase activity /// hydrogen ion transporting ATP synthase activity, rotational mechanism /// hydrogen ion transporting ATPase activity, rotational mechanism                                                                                            | membrane /// membrane /// proton-transporting two-sector ATPase complex                                      |
| 1418653_at | cytochrome P450, family 2, subfamily c, polypeptide 37 /// cytochrome P450, family 2, subfamily c, polypeptide 50 /// cytochrome P450, family 2, subfamily c, polypeptide 54 /// similar to cytochrome P450 | Cyp2c37 /// Cyp2c50 /// Cyp2c54 /// LOC639023 | -2.18 | oxidation reduction                                                                                                                                                                                                                                                                                                                                 | monoxygenase activity /// iron ion binding /// electron carrier activity /// oxidoreductase activity /// heme binding /// metal ion binding /// unspecific monoxygenase activity                                                                                                                                           | endoplasmic reticulum /// endoplasmic reticulum membrane /// microsome /// membrane                          |
| 1434036_at | metastasis suppressor 1                                                                                                                                                                                     | Mtss1                                         | -2.19 | actin filament organization /// signal transduction /// nervous system development /// nervous system development /// muscle development /// actin filament polymerization /// filopodium formation                                                                                                                                                 | actin binding /// actin binding /// actin monomer binding /// receptor binding                                                                                                                                                                                                                                             | cytoplasm /// cytoplasm /// cytoskeleton /// actin cytoskeleton                                              |
| 1449038_at | hydroxysteroid 11-beta dehydrogenase 1                                                                                                                                                                      | Hsd11b1                                       | -2.20 | lipid metabolic process /// metabolic process /// steroid metabolic process /// lung development                                                                                                                                                                                                                                                    | catalytic activity /// 11-beta-hydroxysteroid dehydrogenase activity /// 11-beta-hydroxysteroid dehydrogenase activity /// binding /// oxidoreductase activity                                                                                                                                                             | endoplasmic reticulum /// endoplasmic reticulum membrane /// microsome /// membrane /// integral to membrane |
| 1424401_at | aldehyde dehydrogenase 1 family, member L1                                                                                                                                                                  | Aldh1l1                                       | -2.22 | one-carbon compound metabolic process /// metabolic process /// biosynthetic process /// 10-formyltetrahydrofolate catabolic process                                                                                                                                                                                                                | catalytic activity /// methyltransferase activity /// formyltetrahydrofolate dehydrogenase activity /// oxidoreductase activity /// transferase activity /// hydroxymethyl-, formyl- and related transferase activity /// phosphopantetheine binding /// cofactor binding                                                  | cytoplasm                                                                                                    |
| 1417930_at | Ngfi-A binding protein 2                                                                                                                                                                                    | Nab2                                          | -2.22 | endochondral ossification /// transcription /// regulation of transcription, DNA-dependent /// Schwann cell differentiation /// negative regulation of transcription /// myelination /// regulation of transcription /// regulation of epidermis development                                                                                        | transcription repressor activity /// transcription regulator activity                                                                                                                                                                                                                                                      | nucleus                                                                                                      |
| 1441768_at | RIKEN cDNA 9430051O21 gene                                                                                                                                                                                  | 9430051O21Rik                                 | -2.23 | ---                                                                                                                                                                                                                                                                                                                                                 | ---                                                                                                                                                                                                                                                                                                                        | ---                                                                                                          |
| 1435666_at | microtubule associated serine/threonine kinase 3                                                                                                                                                            | Mast3                                         | -2.23 | protein amino acid phosphorylation                                                                                                                                                                                                                                                                                                                  | nucleotide binding /// magnesium ion binding /// protein kinase activity /// protein serine/threonine kinase activity /// protein binding /// ATP binding /// kinase activity /// transferase activity                                                                                                                     | ---                                                                                                          |



|              |                                                      |         |       |                                                                                                                                                                                                                                                                                                                                                                                                                                                                                                                                                                                                                                                                                                                                                                                                                                                            |                                                                                                                                                                                                                                                                                                                                                                                                       |                                                                                                  |
|--------------|------------------------------------------------------|---------|-------|------------------------------------------------------------------------------------------------------------------------------------------------------------------------------------------------------------------------------------------------------------------------------------------------------------------------------------------------------------------------------------------------------------------------------------------------------------------------------------------------------------------------------------------------------------------------------------------------------------------------------------------------------------------------------------------------------------------------------------------------------------------------------------------------------------------------------------------------------------|-------------------------------------------------------------------------------------------------------------------------------------------------------------------------------------------------------------------------------------------------------------------------------------------------------------------------------------------------------------------------------------------------------|--------------------------------------------------------------------------------------------------|
| 1435254_at   | plexin B1                                            | Plxnb1  | -2.26 | signal transduction /// multicellular organismal development /// positive regulation of axonogenesis                                                                                                                                                                                                                                                                                                                                                                                                                                                                                                                                                                                                                                                                                                                                                       | receptor activity /// protein binding                                                                                                                                                                                                                                                                                                                                                                 | intracellular /// membrane /// integral to membrane                                              |
| 1417785_at   | phospholipase A1 member A                            | Pla1a   | -2.33 | lipid metabolic process /// lipid metabolic process /// lipid catabolic process                                                                                                                                                                                                                                                                                                                                                                                                                                                                                                                                                                                                                                                                                                                                                                            | catalytic activity /// catalytic activity /// hydrolase activity                                                                                                                                                                                                                                                                                                                                      | extracellular region /// extracellular space                                                     |
| 1425623_a_at | cystathionine beta-synthase                          | Cbs     | -2.33 | cysteine biosynthetic process from serine /// metabolic process /// amino acid biosynthetic process /// cysteine biosynthetic process via cystathionine /// cysteine biosynthetic process /// cysteine biosynthetic process /// regulation of JNK activity                                                                                                                                                                                                                                                                                                                                                                                                                                                                                                                                                                                                 | catalytic activity /// cystathionine beta-synthase activity /// iron ion binding /// lyase activity /// pyridoxal phosphate binding /// metal ion binding                                                                                                                                                                                                                                             | nucleus /// cytoplasm                                                                            |
| 1440178_x_at | zeta-chain (TCR) associated protein kinase           | Zap70   | -2.34 | protein amino acid phosphorylation /// protein amino acid phosphorylation /// signal transduction /// intracellular signaling cascade /// peptidyl-tyrosine phosphorylation /// peptidyl-tyrosine phosphorylation /// beta selection /// positive thymic T cell selection /// positive thymic T cell selection /// negative thymic T cell selection /// thymic T cell selection /// positive regulation of T cell differentiation /// positive regulation of T cell differentiation /// positive regulation of alpha-beta T cell differentiation /// positive regulation of alpha-beta T cell differentiation /// positive regulation of alpha-beta T cell proliferation /// protein amino acid autophosphorylation /// protein amino acid autophosphorylation /// positive regulation of calcium-mediated signaling /// T cell receptor signaling pathway | nucleotide binding /// phosphotyrosine binding /// protein kinase activity /// protein kinase activity /// protein tyrosine kinase activity /// protein tyrosine kinase activity /// protein tyrosine kinase activity /// non-membrane spanning protein tyrosine kinase activity /// protein binding /// protein binding /// ATP binding /// ATP binding /// kinase activity /// transferase activity | cytoplasm /// cytosol /// T cell receptor complex                                                |
| 1424934_at   | UDP glucuronosyltransferase 2 family, polypeptide B1 | Ugt2b1  | -2.35 | metabolic process /// metabolic process                                                                                                                                                                                                                                                                                                                                                                                                                                                                                                                                                                                                                                                                                                                                                                                                                    | glucuronosyltransferase activity /// glucuronosyltransferase activity /// transferase activity /// transferase activity /// transferase activity, transferring glycosyl groups /// transferase activity, transferring glycosyl groups /// transferase activity, transferring hexosyl groups /// transferase activity, transferring hexosyl groups                                                     | microsome /// integral to membrane                                                               |
| 1423186_at   | T-cell lymphoma invasion and metastasis 2            | Tiam2   | -2.37 | transport /// signal transduction /// intracellular signaling cascade /// regulation of Rho protein signal transduction                                                                                                                                                                                                                                                                                                                                                                                                                                                                                                                                                                                                                                                                                                                                    | receptor signaling protein activity /// guanyl-nucleotide exchange factor activity /// guanyl-nucleotide exchange factor activity /// Rho guanyl-nucleotide exchange factor activity /// GTPase activator activity /// transporter activity /// protein binding /// protein binding                                                                                                                   | intracellular /// membrane fraction /// cytoplasm /// cytoplasm /// membrane /// cell projection |
| 1447458_at   | ST3 beta-galactoside alpha-2,3-sialyltransferase 4   | St3gal4 | -2.37 | protein amino acid glycosylation                                                                                                                                                                                                                                                                                                                                                                                                                                                                                                                                                                                                                                                                                                                                                                                                                           | sialyltransferase activity<br>transferase activity<br>transferase activity, transferring glycosyl groups                                                                                                                                                                                                                                                                                              | Golgi apparatus<br>membrane<br>integral to membrane                                              |
| 1417629_at   | proline dehydrogenase                                | Prodh   | -2.40 | glutamate biosynthetic process /// proline metabolic process /// proline catabolic process                                                                                                                                                                                                                                                                                                                                                                                                                                                                                                                                                                                                                                                                                                                                                                 | proline dehydrogenase activity /// proline dehydrogenase activity /// oxidoreductase activity                                                                                                                                                                                                                                                                                                         | mitochondrion /// mitochondrial inner membrane /// mitochondrial matrix                          |

|              |                                                |        |       |                                                                                                                                                                                                                                                                                                                                                                                                                                                                                                                                                                                                                                                                                                                                                                                                                                                            |                                                                                                                                                                                                                                                                                                                                                                                                       |                                                                        |
|--------------|------------------------------------------------|--------|-------|------------------------------------------------------------------------------------------------------------------------------------------------------------------------------------------------------------------------------------------------------------------------------------------------------------------------------------------------------------------------------------------------------------------------------------------------------------------------------------------------------------------------------------------------------------------------------------------------------------------------------------------------------------------------------------------------------------------------------------------------------------------------------------------------------------------------------------------------------------|-------------------------------------------------------------------------------------------------------------------------------------------------------------------------------------------------------------------------------------------------------------------------------------------------------------------------------------------------------------------------------------------------------|------------------------------------------------------------------------|
| 1426389_at   | calcium/calmodulin-dependent protein kinase ID | Camk1d | -2.47 | protein amino acid phosphorylation /// regulation of apoptosis                                                                                                                                                                                                                                                                                                                                                                                                                                                                                                                                                                                                                                                                                                                                                                                             | nucleotide binding /// catalytic activity /// protein kinase activity /// protein serine/threonine kinase activity /// calmodulin-dependent protein kinase activity /// calmodulin-dependent protein kinase activity /// calcium ion binding /// calmodulin binding /// ATP binding /// kinase activity /// transferase activity                                                                      | nucleus /// cytoplasm /// cytoplasm                                    |
| 1418808_at   | retinol dehydrogenase 5                        | Rdh5   | -2.51 | metabolic process /// metabolic process                                                                                                                                                                                                                                                                                                                                                                                                                                                                                                                                                                                                                                                                                                                                                                                                                    | catalytic activity /// retinol dehydrogenase activity /// retinol dehydrogenase activity /// binding /// oxidoreductase activity                                                                                                                                                                                                                                                                      | integral to membrane                                                   |
| 1451788_at   | coagulation factor XI                          | F11    | -2.57 | proteolysis /// blood coagulation /// regulation of blood coagulation                                                                                                                                                                                                                                                                                                                                                                                                                                                                                                                                                                                                                                                                                                                                                                                      | coagulation factor XIa activity /// catalytic activity /// serine-type endopeptidase activity /// heparin binding /// peptidase activity /// hydrolase activity                                                                                                                                                                                                                                       | extracellular region                                                   |
| 1450970_at   | glutamate oxaloacetate transaminase 1, soluble | Got1   | -2.57 | oxaloacetate metabolic process /// glycerol biosynthetic process /// amino acid metabolic process /// aspartate biosynthetic process /// biosynthetic process /// glutamate catabolic process to aspartate /// glutamate catabolic process to 2-oxoglutarate /// fatty acid homeostasis                                                                                                                                                                                                                                                                                                                                                                                                                                                                                                                                                                    | catalytic activity /// aspartate transaminase activity /// aspartate transaminase activity /// phosphatidylserine decarboxylase activity /// transaminase activity /// transferase activity /// transferase activity, transferring nitrogenous groups /// pyridoxal phosphate binding                                                                                                                 | cytoplasm /// cytosol                                                  |
| 1435245_at   | glutaminase 2 (liver, mitochondrial)           | Gls2   | -2.59 | glutamine metabolic process                                                                                                                                                                                                                                                                                                                                                                                                                                                                                                                                                                                                                                                                                                                                                                                                                                | glutaminase activity /// glutaminase activity /// protein binding /// protein binding /// hydrolase activity /// hydrolase activity                                                                                                                                                                                                                                                                   | mitochondrion                                                          |
| 1422701_at   | zeta-chain (TCR) associated protein kinase     | Zap70  | -2.61 | protein amino acid phosphorylation /// protein amino acid phosphorylation /// signal transduction /// intracellular signaling cascade /// peptidyl-tyrosine phosphorylation /// peptidyl-tyrosine phosphorylation /// beta selection /// positive thymic T cell selection /// positive thymic T cell selection /// negative thymic T cell selection /// thymic T cell selection /// positive regulation of T cell differentiation /// positive regulation of T cell differentiation /// positive regulation of alpha-beta T cell differentiation /// positive regulation of alpha-beta T cell differentiation /// positive regulation of alpha-beta T cell proliferation /// protein amino acid autophosphorylation /// protein amino acid autophosphorylation /// positive regulation of calcium-mediated signaling /// T cell receptor signaling pathway | nucleotide binding /// phosphotyrosine binding /// protein kinase activity /// protein kinase activity /// protein tyrosine kinase activity /// protein tyrosine kinase activity /// protein tyrosine kinase activity /// non-membrane spanning protein tyrosine kinase activity /// protein binding /// protein binding /// ATP binding /// ATP binding /// kinase activity /// transferase activity | cytoplasm /// cytosol /// T cell receptor complex                      |
| 1459361_at   | ---                                            | ---    | -2.70 | ---                                                                                                                                                                                                                                                                                                                                                                                                                                                                                                                                                                                                                                                                                                                                                                                                                                                        | ---                                                                                                                                                                                                                                                                                                                                                                                                   | ---                                                                    |
| 1454880_s_at | Bcl2 modifying factor                          | Bmf    | -2.72 | apoptosis /// apoptosis /// regulation of apoptosis                                                                                                                                                                                                                                                                                                                                                                                                                                                                                                                                                                                                                                                                                                                                                                                                        | protein binding                                                                                                                                                                                                                                                                                                                                                                                       | cytoplasm /// actin cytoskeleton /// myosin complex /// myosin complex |
| 1446284_at   | metastasis suppressor 1                        | Mtss1  | -2.73 | actin filament organization /// signal transduction /// nervous system development /// nervous system development /// muscle development /// actin filament polymerization /// filopodium formation                                                                                                                                                                                                                                                                                                                                                                                                                                                                                                                                                                                                                                                        | actin binding /// actin binding /// actin monomer binding /// receptor binding                                                                                                                                                                                                                                                                                                                        | cytoplasm /// cytoplasm /// cytoskeleton /// actin cytoskeleton        |

|              |                                                        |          |       |                                                                                                                                                                                                                                                                                          |                                                                                                                                                                                                                                                         |                                                                                              |
|--------------|--------------------------------------------------------|----------|-------|------------------------------------------------------------------------------------------------------------------------------------------------------------------------------------------------------------------------------------------------------------------------------------------|---------------------------------------------------------------------------------------------------------------------------------------------------------------------------------------------------------------------------------------------------------|----------------------------------------------------------------------------------------------|
| 1424367_a_at | homer homolog 2 (Drosophila)                           | Homer2   | -2.74 | metabotropic glutamate receptor signaling pathway                                                                                                                                                                                                                                        | actin binding /// protein binding /// GKAP/Homer scaffold activity                                                                                                                                                                                      | cytoplasm /// cytoplasm /// membrane /// cell junction /// synapse /// postsynaptic membrane |
| 1439293_at   | cDNA sequence BC031353                                 | BC031353 | -2.75 | ---                                                                                                                                                                                                                                                                                      | ---                                                                                                                                                                                                                                                     | ---                                                                                          |
| 1458832_at   | ---                                                    | ---      | -2.81 | ---                                                                                                                                                                                                                                                                                      | ---                                                                                                                                                                                                                                                     | ---                                                                                          |
| 1417017_at   | cytochrome P450, family 17, subfamily a, polypeptide 1 | Cyp17a1  | -3.57 | C21-steroid hormone biosynthetic process /// glucocorticoid biosynthetic process /// response to toxin /// oxidation reduction                                                                                                                                                           | monooxygenase activity /// steroid 17-alpha-monooxygenase activity /// steroid 17-alpha-monooxygenase activity /// iron ion binding /// electron carrier activity /// oxidoreductase activity /// lyase activity /// heme binding /// metal ion binding | mitochondrion /// endoplasmic reticulum /// membrane /// axon /// cell soma                  |
| 1451681_at   | cDNA sequence BC089597                                 | BC089597 | -3.65 | metabolic process                                                                                                                                                                                                                                                                        | catalytic activity /// binding /// oxidoreductase activity                                                                                                                                                                                              | ---                                                                                          |
| 1427472_a_at | complement component 8, beta subunit                   | C8b      | -3.80 | immune response /// complement activation /// complement activation, alternative pathway /// complement activation, alternative pathway /// complement activation, classical pathway /// complement activation, classical pathway /// cytolysis /// cytolysis /// innate immune response | ---                                                                                                                                                                                                                                                     | extracellular region /// membrane attack complex /// membrane attack complex                 |
| 1458701_at   | preimplantation protein 4                              | Prei4    | -4.18 | carbohydrate metabolic process /// glycerol metabolic process                                                                                                                                                                                                                            | catalytic activity /// glycerophosphodiester phosphodiesterase activity /// hydrolase activity /// carbohydrate binding                                                                                                                                 | ---                                                                                          |

|              |                                                                |                                 |       |                                                                                                                                                                                                                                                        |                                                                                                                                                                                                                                               |                                                                                                                                                                  |
|--------------|----------------------------------------------------------------|---------------------------------|-------|--------------------------------------------------------------------------------------------------------------------------------------------------------------------------------------------------------------------------------------------------------|-----------------------------------------------------------------------------------------------------------------------------------------------------------------------------------------------------------------------------------------------|------------------------------------------------------------------------------------------------------------------------------------------------------------------|
| 1422815_at   | complement component 9                                         | C9                              | -4.19 | induction of apoptosis /// caspase activation /// immune response /// complement activation /// complement activation, alternative pathway /// complement activation, classical pathway /// blood coagulation /// cytolysis /// innate immune response | ---                                                                                                                                                                                                                                           | extracellular region /// membrane attack complex /// extracellular space /// membrane /// integral to membrane                                                   |
| 1452416_at   | interleukin 6 receptor, alpha                                  | Il6ra                           | -4.28 | cell surface receptor linked signal transduction                                                                                                                                                                                                       | receptor activity /// hematopoietin/interferon-class (D200-domain) cytokine receptor activity /// interleukin receptor activity                                                                                                               | integral to plasma membrane /// membrane /// integral to membrane /// integral to membrane                                                                       |
| 1425751_at   | cDNA sequence BC014805                                         | BC014805                        | -4.48 | transport                                                                                                                                                                                                                                              | transporter activity                                                                                                                                                                                                                          | integral to membrane                                                                                                                                             |
| 1419857_at   | Transcribed locus                                              | ---                             | -4.52 | ---                                                                                                                                                                                                                                                    | ---                                                                                                                                                                                                                                           | ---                                                                                                                                                              |
| 1425752_at   | cDNA sequence BC014805                                         | BC014805                        | -4.86 | transport                                                                                                                                                                                                                                              | transporter activity                                                                                                                                                                                                                          | integral to membrane                                                                                                                                             |
| 1455457_at   | cytochrome P450, family 2, subfamily c, polypeptide 54         | Cyp2c54                         | -5.63 | oxidation reduction                                                                                                                                                                                                                                    | monooxygenase activity /// iron ion binding /// electron carrier activity /// oxidoreductase activity /// heme binding /// metal ion binding /// unspecific monooxygenase activity                                                            | endoplasmic reticulum /// endoplasmic reticulum membrane /// microsome /// membrane                                                                              |
| 1455383_at   | hypothetical protein C730043O17                                | C730043O17                      | -5.73 | ---                                                                                                                                                                                                                                                    | ---                                                                                                                                                                                                                                           | ---                                                                                                                                                              |
| 1428739_at   | RIKEN cDNA 2310040A07 gene                                     | 2310040A07Rik                   | -5.76 | ---                                                                                                                                                                                                                                                    | ---                                                                                                                                                                                                                                           | membrane /// integral to membrane                                                                                                                                |
| 1419559_at   | cytochrome P450, family 4, subfamily f, polypeptide 14         | Cyp4f14                         | -6.07 | oxidation reduction                                                                                                                                                                                                                                    | monooxygenase activity /// iron ion binding /// electron carrier activity /// oxidoreductase activity /// heme binding /// metal ion binding /// leukotriene-B4 20-monooxygenase activity                                                     | extracellular space /// endoplasmic reticulum /// endoplasmic reticulum /// endoplasmic reticulum membrane /// microsome /// microsome /// membrane /// membrane |
| 1420405_at   | solute carrier organic anion transporter family, member 1a4    | Slco1a4                         | -6.09 | transport /// ion transport /// anion transport                                                                                                                                                                                                        | transporter activity /// organic anion transmembrane transporter activity                                                                                                                                                                     | membrane fraction /// membrane /// integral to membrane                                                                                                          |
| 1451460_a_at | solute carrier family 22 (organic anion transporter), member 7 | Slc22a7                         | -7.06 | transport /// transport /// ion transport /// ion transport /// organic anion transport                                                                                                                                                                | transporter activity /// transporter activity /// organic anion transmembrane transporter activity /// organic anion transmembrane transporter activity /// ion transmembrane transporter activity /// ion transmembrane transporter activity | integral to plasma membrane /// membrane /// membrane /// integral to membrane /// integral to membrane /// basolateral plasma membrane                          |
| 1436504_x_at | apolipoprotein A-IV                                            | Apoa4                           | -7.13 | innate immune response in mucosa /// transport /// lipid transport /// regulation of cholesterol absorption /// lipoprotein metabolic process                                                                                                          | lipid transporter activity /// lipid binding                                                                                                                                                                                                  | extracellular region /// extracellular space /// extracellular space /// chylomicron                                                                             |
| 1452893_s_at | RIKEN cDNA 1110065P19 gene /// RIKEN cDNA 2310040A07 gene      | 1110065P19Rik /// 2310040A07Rik | -7.56 | ---                                                                                                                                                                                                                                                    | ---                                                                                                                                                                                                                                           | membrane /// integral to membrane                                                                                                                                |

|              |                                                |       |        |                                                                                                                                                                                                                                                                                                                                                                                   |                                                                                                                                                                                                                                                        |                                                                                       |
|--------------|------------------------------------------------|-------|--------|-----------------------------------------------------------------------------------------------------------------------------------------------------------------------------------------------------------------------------------------------------------------------------------------------------------------------------------------------------------------------------------|--------------------------------------------------------------------------------------------------------------------------------------------------------------------------------------------------------------------------------------------------------|---------------------------------------------------------------------------------------|
| 1417761_at   | apolipoprotein A-IV                            | Apoa4 | -12.36 | innate immune response in mucosa /// transport /// lipid transport /// regulation of cholesterol absorption /// lipoprotein metabolic process                                                                                                                                                                                                                                     | lipid transporter activity /// lipid binding                                                                                                                                                                                                           | extracellular region /// extracellular space /// extracellular space /// chylomicron  |
| 1435196_at   | neurotrophic tyrosine kinase, receptor, type 2 | Ntrk2 | -15.19 | vasculogenesis /// protein amino acid phosphorylation /// transmembrane receptor protein tyrosine kinase signaling pathway /// multicellular organismal development /// nervous system development /// feeding behavior /// glutamate secretion /// regulation of metabolic process /// cell differentiation /// mechanoreceptor differentiation /// retinal rod cell development | nucleotide binding /// protein kinase activity /// protein tyrosine kinase activity /// transmembrane receptor protein tyrosine kinase activity /// receptor activity /// protein binding /// ATP binding /// kinase activity /// transferase activity | cytosol /// plasma membrane /// membrane /// integral to membrane /// terminal button |
| 1432517_a_at | nicotinamide N-methyltransferase               | Nnmt  | -26.83 | ---                                                                                                                                                                                                                                                                                                                                                                               | nicotinamide N-methyltransferase activity /// methyltransferase activity /// transferase activity                                                                                                                                                      | cytoplasm                                                                             |

---
