# Supplementary material
Source: PubMed Central journal article supplement (PMC2882619)
Supplement: tpj200951x3.pdf [file tpj200951x3.pdf]

**Supplementary Table 3:** The Correlation Coefficients between each of the significantly changed genes (313 probe sets), as identified by SAM  $\geq 2$  fold and 0% FDR), and each of the significantly changed transcription factors. The gradient of colors highlights increasing CC values (yellow: 0.9400-0.9499, light orange: 0.9500-0.9599, orange: 0.9600-0.9699, dark orange: 0.9700-0.9799, red  $\geq 0.9800$ ).

| Probe Set ID | Gene Title                                           | Gene Symbol | Esrrg   | Arid5b  | Klf13   | Lhx6    | Jun *   | Nab2    | E2f8    |
|--------------|------------------------------------------------------|-------------|---------|---------|---------|---------|---------|---------|---------|
| 1415776_at   | aldehyde dehydrogenase family 3, subfamily A2        | Aldh3a2     | 0.9748  | -0.9634 | -0.9228 | 0.8629  | 0.7977  | -0.8831 | 0.7803  |
| 1415777_at   | pancreatic lipase related protein 1                  | Pnliprp1    | 0.9057  | -0.9105 | -0.8867 | 0.8916  | 0.7315  | -0.7676 | 0.7045  |
| 1415802_at   | solute carrier family 16 (monocarboxylic acid trans) | Slc16a1     | 0.8330  | -0.8556 | -0.8437 | 0.9147  | 0.8821  | -0.7719 | 0.8309  |
| 1415904_at   | lipoprotein lipase                                   | Lpl         | 0.9216  | -0.9309 | -0.9533 | 0.9192  | 0.8503  | -0.7842 | 0.7772  |
| 1415932_x_at | ATPase, class II, type 9A                            | Atp9a       | 0.9706  | -0.9702 | -0.9300 | 0.9011  | 0.8022  | -0.8219 | 0.7799  |
| 1415965_at   | stearoyl-Coenzyme A desaturase 1                     | Scd1        | 0.8493  | -0.8324 | -0.8991 | 0.8383  | 0.8630  | -0.6922 | 0.7252  |
| 1416023_at   | stearoyl-Coenzyme A desaturase 1                     | Fabp3       | 0.9021  | -0.9401 | -0.9150 | 0.9144  | 0.7989  | -0.8574 | 0.8782  |
| 1416066_at   | CD9 antigen                                          | Cd9         | 0.7587  | -0.8161 | -0.8594 | 0.8993  | 0.8382  | -0.6810 | 0.8619  |
| 1416101_a_at | histone cluster 1, H1c                               | Hist1h1c    | 0.8337  | -0.8811 | -0.9238 | 0.9429  | 0.8906  | -0.7754 | 0.8330  |
| 1416308_at   | UDP-glucose dehydrogenase                            | Ugdh        | 0.8781  | -0.8945 | -0.8987 | 0.8075  | 0.8542  | -0.7684 | 0.6868  |
| 1416488_at   | cyclin G2                                            | Ccng2       | 0.9130  | -0.9140 | -0.8708 | 0.8693  | 0.9140  | -0.8644 | 0.7810  |
| 1416590_a_at | RAB34, member of RAS oncogene family                 | Rab34       | 0.8809  | -0.9333 | -0.8586 | 0.8541  | 0.6708  | -0.7100 | 0.7102  |
| 1416591_at   | RAB34, member of RAS oncogene family                 | Rab34       | 0.9296  | -0.9515 | -0.8972 | 0.8861  | 0.7236  | -0.8011 | 0.8015  |
| 1416632_at   | malic enzyme 1, NADP(+)-dependent, cytosolic ///     | Mod1        | 0.9813  | -0.9276 | -0.8866 | 0.8403  | 0.8147  | -0.8604 | 0.7608  |
| 1416896_at   | ribosomal protein S6 kinase polypeptide 1            | Rps6ka1     | 0.8818  | -0.8741 | -0.8337 | 0.8594  | 0.7396  | -0.7593 | 0.7649  |
| 1416930_at   | lymphocyte antigen 6 complex, locus D                | Ly6d        | 0.9601  | -0.9386 | -0.9449 | 0.8940  | 0.8694  | -0.7916 | 0.7225  |
| 1417008_at   | carnitine acetyltransferase                          | Crat        | 0.9541  | -0.9336 | -0.9104 | 0.8663  | 0.8289  | -0.8085 | 0.7987  |
| 1417017_at   | cytochrome P450, family 17, subfamily a, polypept    | Cyp17a1     | -0.7635 | 0.8507  | 0.9248  | -0.9483 | -0.7058 | 0.6754  | -0.6350 |
| 1417177_at   | galactokinase 1                                      | Galk1       | 0.9783  | -0.9631 | -0.9108 | 0.8647  | 0.8400  | -0.8444 | 0.8115  |
| 1417268_at   | CD14 antigen                                         | Cd14        | 0.8088  | -0.7491 | -0.7775 | 0.6949  | 0.8149  | -0.6077 | 0.6971  |
| 1417273_at   | pyruvate dehydrogenase kinase, isoenzyme 4           | Pdk4        | 0.9257  | -0.9474 | -0.9180 | 0.9424  | 0.8187  | -0.8430 | 0.8433  |
| 1417336_a_at | synaptotagmin-like 4                                 | Syt4        | 0.9228  | -0.9326 | -0.8870 | 0.8107  | 0.7529  | -0.7038 | 0.5537  |
| 1417409_at   | Jun oncogene                                         | Jun         | 0.8690  | -0.8536 | -0.8866 | 0.8594  | 0.9721  | -0.7317 | 0.6423  |
| 1417449_at   | acyl-CoA thioesterase 8                              | Acot8       | 0.9761  | -0.9410 | -0.8729 | 0.8158  | 0.7487  | -0.8546 | 0.8107  |
| 1417629_at   | proline dehydrogenase                                | Prodh       | -0.8163 | 0.7943  | 0.8396  | -0.8524 | -0.8157 | 0.6632  | -0.8167 |
| 1417761_at   | apolipoprotein A-IV                                  | Apoa4       | -0.9760 | 0.9730  | 0.8853  | -0.8107 | -0.7422 | 0.9027  | -0.6803 |
| 1417785_at   | phospholipase A1 member A                            | Pla1a       | -0.9323 | 0.9208  | 0.9013  | -0.8976 | -0.8421 | 0.8496  | -0.8782 |
| 1417860_a_at | spondin 2, extracellular matrix protein              | Spon2       | 0.8641  | -0.9121 | -0.8910 | 0.8754  | 0.8433  | -0.8141 | 0.8026  |
| 1417867_at   | complement factor D (adipsin)                        | Cfd         | 0.8664  | -0.8936 | -0.9025 | 0.8398  | 0.7005  | -0.7552 | 0.7927  |
| 1417879_at   | neuron derived neurotrophic factor                   | Nenf        | 0.8721  | -0.8625 | -0.8600 | 0.7770  | 0.6628  | -0.7279 | 0.7600  |
| 1417883_at   | glutathione S-transferase, theta 2                   | Gstt2       | 0.9104  | -0.9012 | -0.9289 | 0.8532  | 0.7447  | -0.7821 | 0.7046  |

|              |                                                         |                     |         |         |         |         |         |         |         |
|--------------|---------------------------------------------------------|---------------------|---------|---------|---------|---------|---------|---------|---------|
| 1417900_a_at | very low density lipoprotein receptor                   | Vldlr               | 0.9616  | -0.9423 | -0.9401 | 0.8481  | 0.8141  | -0.8075 | 0.6945  |
| 1417930_at   | Ngfi-A binding protein 2                                | Nab2                | -0.8830 | 0.8820  | 0.8300  | -0.7809 | -0.6804 | 1.0000  | -0.6918 |
| 1417963_at   | phospholipid transfer protein                           | Pltp                | 0.9663  | -0.9529 | -0.9266 | 0.8866  | 0.8595  | -0.8445 | 0.7892  |
| 1418013_at   | camello-like 1                                          | Cml1                | -0.9670 | 0.9390  | 0.8487  | -0.7617 | -0.7344 | 0.9170  | -0.6958 |
| 1418050_at   | glycosylphosphatidylinositol specific phospholipase     | Gpld1               | -0.8653 | 0.8473  | 0.8999  | -0.8796 | -0.8416 | 0.6771  | -0.7400 |
| 1418073_at   | acyl-CoA thioesterase 9                                 | Acot9               | 0.9287  | -0.9333 | -0.9685 | 0.8974  | 0.9020  | -0.8097 | 0.6729  |
| 1418123_at   | unc-119 homolog (C. elegans)                            | Unc119              | 0.9149  | -0.9285 | -0.9009 | 0.8604  | 0.7429  | -0.7835 | 0.8149  |
| 1418181_at   | protein tyrosine phosphatase 4a3                        | Ptp4a3              | 0.8793  | -0.8950 | -0.8934 | 0.9172  | 0.8236  | -0.7084 | 0.7945  |
| 1418210_at   | profilin 2                                              | Pfn2                | 0.9223  | -0.9089 | -0.9142 | 0.8436  | 0.8941  | -0.8011 | 0.7731  |
| 1418213_at   | keratin 23                                              | Krt23               | 0.8842  | -0.8745 | -0.9291 | 0.8889  | 0.8853  | -0.6915 | 0.6773  |
| 1418321_at   | dodecenoyl-Coenzyme A delta isomerase (3,2 trans)       | Dci                 | 0.9638  | -0.9451 | -0.9045 | 0.8633  | 0.8679  | -0.8361 | 0.8283  |
| 1418328_at   | carnitine palmitoyltransferase 1b, muscle /// choline   | Cpt1b /// Chkb-cpt1 | 0.8935  | -0.8855 | -0.8950 | 0.8231  | 0.8964  | -0.7590 | 0.6623  |
| 1418438_at   | fatty acid binding protein 2, intestinal                | Fabp2               | 0.9672  | -0.9646 | -0.9284 | 0.9003  | 0.8144  | -0.8428 | 0.8295  |
| 1418486_at   | vanin 1                                                 | Vnn1                | 0.9832  | -0.9450 | -0.8904 | 0.8327  | 0.8237  | -0.8761 | 0.7983  |
| 1418652_at   | chemokine (C-X-C motif) ligand 9                        | Cxcl9               | 0.6628  | -0.7395 | -0.8131 | 0.8159  | 0.8901  | -0.6231 | 0.5968  |
| 1418653_at   | cytochrome P450, family 2, subfamily c, polypeptide     | Cyp2c50             | -0.8103 | 0.7866  | 0.8713  | -0.8523 | -0.7703 | 0.7348  | -0.7017 |
| 1418654_at   | hydroxyacid oxidase (glycolate oxidase) 3               | Hao3                | 0.8178  | -0.7725 | -0.7775 | 0.7085  | 0.6678  | -0.5597 | 0.5800  |
| 1418808_at   | retinol dehydrogenase 5                                 | Rdh5                | -0.9641 | 0.9552  | 0.8863  | -0.8290 | -0.8221 | 0.8438  | -0.7331 |
| 1418833_at   | alanine-glyoxylate aminotransferase                     | Agxt                | -0.9442 | 0.8904  | 0.8007  | -0.7571 | -0.6913 | 0.9305  | -0.7747 |
| 1418949_at   | growth differentiation factor 15                        | Gdf15               | 0.7602  | -0.7997 | -0.8395 | 0.8078  | 0.9149  | -0.7032 | 0.6945  |
| 1418989_at   | cathepsin E                                             | Ctse                | 0.9295  | -0.9594 | -0.9502 | 0.9403  | 0.8754  | -0.8390 | 0.8070  |
| 1419091_a_at | annexin A2                                              | Anxa2               | 0.8814  | -0.8955 | -0.8661 | 0.8926  | 0.7453  | -0.7362 | 0.6996  |
| 1419103_a_at | abhydrolase domain containing 6                         | Abhd6               | 0.9581  | -0.9196 | -0.8833 | 0.8328  | 0.7811  | -0.8386 | 0.7966  |
| 1419104_at   | abhydrolase domain containing 6                         | Abhd6               | 0.9288  | -0.8635 | -0.8273 | 0.7307  | 0.6338  | -0.8146 | 0.6358  |
| 1419173_at   | aminoacylase 1                                          | Acy1                | -0.9164 | 0.9269  | 0.9043  | -0.9248 | -0.8846 | 0.8166  | -0.8458 |
| 1419349_a_at | cytochrome P450, family 2, subfamily d, polypeptide     | Cyp2d9              | 0.8742  | -0.9315 | -0.9125 | 0.9256  | 0.8686  | -0.8096 | 0.7275  |
| 1419365_at   | peroxisomal biogenesis factor 11a                       | Pex11a              | 0.9736  | -0.9498 | -0.9206 | 0.8625  | 0.8427  | -0.8629 | 0.7879  |
| 1419382_a_at | dehydrogenase/reductase (SDR family) member 4           | Dhrs4               | 0.9404  | -0.9323 | -0.9090 | 0.8763  | 0.7734  | -0.8564 | 0.8231  |
| 1419435_at   | aldehyde oxidase 1                                      | Aox1                | 0.9398  | -0.9449 | -0.9404 | 0.9158  | 0.8577  | -0.9123 | 0.8164  |
| 1419491_at   | defensin beta 1                                         | Defb1               | 0.8870  | -0.9014 | -0.9095 | 0.8882  | 0.8638  | -0.7782 | 0.6728  |
| 1419492_s_at | defensin beta 1                                         | Defb1               | 0.7757  | -0.8053 | -0.8232 | 0.8355  | 0.9188  | -0.7094 | 0.7352  |
| 1419504_at   | monoacylglycerol O-acyltransferase 1 /// similar to     | Mogat1 /// LOC100   | 0.9575  | -0.9545 | -0.9474 | 0.9327  | 0.8834  | -0.8201 | 0.7687  |
| 1419559_at   | cytochrome P450, family 4, subfamily f, polypeptide     | Cyp4f14             | -0.9415 | 0.9710  | 0.9769  | -0.9348 | -0.8669 | 0.8417  | -0.7260 |
| 1419573_a_at | lectin, galactose binding, soluble 1                    | Lgals1              | 0.9485  | -0.9277 | -0.9131 | 0.8581  | 0.8045  | -0.7470 | 0.7361  |
| 1419738_a_at | tropomyosin 2, beta                                     | Tpm2                | 0.9403  | -0.9105 | -0.9097 | 0.8409  | 0.8148  | -0.7879 | 0.7091  |
| 1419857_at   | ---                                                     | ---                 | -0.8748 | 0.8606  | 0.9086  | -0.8843 | -0.8207 | 0.7461  | -0.7653 |
| 1420405_at   | solute carrier organic anion transporter family, member | Slco1a4             | -0.8405 | 0.8300  | 0.8848  | -0.8839 | -0.8707 | 0.6823  | -0.7996 |
| 1420541_at   | retinol dehydrogenase 16                                | Rdh16               | 0.9635  | -0.9222 | -0.8068 | 0.7473  | 0.7899  | -0.8080 | 0.7285  |

|              |                                                             |                             |         |         |         |         |         |         |         |
|--------------|-------------------------------------------------------------|-----------------------------|---------|---------|---------|---------|---------|---------|---------|
| 1420603_s_at | retinoic acid early transcript 1, alpha /// retinoic acid   | Raet1a /// Raet1b /         | 0.8207  | -0.7894 | -0.7836 | 0.6553  | 0.6390  | -0.5873 | 0.4390  |
| 1420657_at   | uncoupling protein 3 (mitochondrial, proton carrier) Ucp3   |                             | 0.7445  | -0.7761 | -0.8316 | 0.8758  | 0.6613  | -0.6249 | 0.6399  |
| 1420722_at   | elongation of very long chain fatty acids (FEN1/Elo         | Elov3                       | 0.9015  | -0.9070 | -0.8453 | 0.7809  | 0.7286  | -0.7558 | 0.6039  |
| 1420836_at   | solute carrier family 25, member 30                         | Slc25a30                    | 0.8548  | -0.8043 | -0.7897 | 0.7641  | 0.6720  | -0.7466 | 0.7865  |
| 1420973_at   | AT rich interactive domain 5B (Mrf1 like) /// similar       | Arid5b /// LOC1000          | -0.9656 | 1.0000  | 0.9559  | -0.9165 | -0.8147 | 0.8820  | -0.7324 |
| 1421011_at   | hydroxysteroid (17-beta) dehydrogenase 11                   | Hsd17b11                    | 0.9449  | -0.9628 | -0.9446 | 0.9481  | 0.8438  | -0.8491 | 0.8166  |
| 1421116_a_at | reticulin 4                                                 | Rtn4                        | 0.9532  | -0.9392 | -0.9102 | 0.8086  | 0.8048  | -0.7971 | 0.6731  |
| 1421214_at   | cytidine monophospho-N-acetylneuraminic acid hydrolase 1    | Cmah                        | -0.9351 | 0.9679  | 0.9183  | -0.8442 | -0.7833 | 0.8430  | -0.6115 |
| 1421422_at   | RIKEN cDNA 5033411D12 gene                                  | 5033411D12Rik               | 0.9306  | -0.9653 | -0.9588 | 0.9129  | 0.8251  | -0.8662 | 0.7862  |
| 1421425_a_at | regulator of calcineurin 2                                  | Rcan2                       | 0.9670  | -0.9545 | -0.9325 | 0.8598  | 0.8134  | -0.8110 | 0.6835  |
| 1421430_at   | RAD51-like 1 (S. cerevisiae)                                | Rad511                      | 0.9551  | -0.9595 | -0.9171 | 0.9019  | 0.8410  | -0.8601 | 0.8623  |
| 1421848_at   | solute carrier family 22 (organic cation transporter)       | Slc22a5                     | 0.9515  | -0.9141 | -0.8627 | 0.7834  | 0.6668  | -0.8463 | 0.7324  |
| 1421878_at   | mitogen-activated protein kinase 9                          | Mapk9                       | 0.8997  | -0.9554 | -0.9609 | 0.8720  | 0.7492  | -0.8301 | 0.6580  |
| 1422076_at   | acyl-CoA thioesterase 4                                     | Acot4                       | 0.8473  | -0.7955 | -0.7555 | 0.6836  | 0.5604  | -0.7083 | 0.7404  |
| 1422146_at   | sema domain, seven thrombospondin repeats (type 1)          | Sema5b                      | 0.8699  | -0.8712 | -0.8804 | 0.8139  | 0.7572  | -0.6345 | 0.6907  |
| 1422147_a_at | phospholipase A2, group VI                                  | Pla2g6                      | 0.8827  | -0.8791 | -0.9057 | 0.8875  | 0.7688  | -0.7409 | 0.7991  |
| 1422262_a_at | LIM homeobox protein 6                                      | Lhx6                        | 0.8367  | -0.9165 | -0.9624 | 1.0000  | 0.8521  | -0.7809 | 0.6987  |
| 1422438_at   | epoxide hydrolase 1, microsomal                             | Ephx1                       | 0.8995  | -0.9176 | -0.9242 | 0.9146  | 0.8298  | -0.8126 | 0.8654  |
| 1422445_at   | integrin alpha 6                                            | Itga6                       | 0.8818  | -0.9125 | -0.8796 | 0.8368  | 0.7053  | -0.7344 | 0.7229  |
| 1422701_at   | zeta-chain (TCR) associated protein kinase                  | Zap70                       | -0.9245 | 0.9614  | 0.9466  | -0.8795 | -0.7670 | 0.9405  | -0.6621 |
| 1422811_at   | solute carrier family 27 (fatty acid transporter), member 1 | Slc27a1                     | 0.9654  | -0.9554 | -0.9487 | 0.9075  | 0.8571  | -0.7955 | 0.6893  |
| 1422815_at   | complement component 9                                      | C9                          | -0.9526 | 0.9196  | 0.7840  | -0.7160 | -0.6433 | 0.8889  | -0.7205 |
| 1422906_at   | ATP-binding cassette, sub-family G (WHITE), member 2        | Abcg2                       | 0.9631  | -0.9723 | -0.9424 | 0.9344  | 0.8849  | -0.8638 | 0.8007  |
| 1422943_a_at | heat shock protein 1                                        | Hspb1                       | 0.8805  | -0.9073 | -0.8605 | 0.8907  | 0.8076  | -0.8515 | 0.9267  |
| 1422996_at   | acyl-CoA thioesterase 2                                     | Acot2                       | 0.9490  | -0.9377 | -0.9257 | 0.8632  | 0.8122  | -0.7865 | 0.6912  |
| 1422997_s_at | acyl-CoA thioesterase 1 /// acyl-CoA thioesterase 2         | Acot1 /// Acot2 /// LOC1000 | 0.9574  | -0.9459 | -0.9250 | 0.8920  | 0.8324  | -0.8468 | 0.8454  |
| 1423017_a_at | interleukin 1 receptor antagonist                           | Il1rn                       | 0.8464  | -0.8280 | -0.8831 | 0.8262  | 0.7852  | -0.6248 | 0.6728  |
| 1423166_at   | CD36 antigen                                                | Cd36                        | 0.9601  | -0.9563 | -0.9389 | 0.8921  | 0.8803  | -0.8160 | 0.8035  |
| 1423186_at   | T-cell lymphoma invasion and metastasis 2                   | Tiam2                       | -0.9111 | 0.9022  | 0.8512  | -0.7723 | -0.6882 | 0.9120  | -0.7058 |
| 1423266_at   | RIKEN cDNA 2810405K02 gene                                  | 2810405K02Rik               | 0.9404  | -0.9298 | -0.9079 | 0.8434  | 0.7363  | -0.8402 | 0.7667  |
| 1423308_at   | trans-golgi network protein /// hypothetical protein        | TGoln1 /// LOC1000          | 0.9297  | -0.9223 | -0.9098 | 0.9011  | 0.8819  | -0.8006 | 0.8308  |
| 1423447_at   | caseinolytic peptidase X (E.coli)                           | Clpx                        | 0.8169  | -0.8242 | -0.8084 | 0.7825  | 0.9028  | -0.7979 | 0.6635  |
| 1423669_at   | collagen, type I, alpha 1                                   | Col1a1                      | 0.8525  | -0.8671 | -0.8996 | 0.8218  | 0.7356  | -0.7661 | 0.6394  |
| 1423844_s_at | cystathionine beta-synthase                                 | Cbs                         | -0.9150 | 0.8589  | 0.7832  | -0.7509 | -0.6388 | 0.8440  | -0.7943 |
| 1424118_a_at | SPC25, NDC80 kinetochore complex component, 1               | Spc25                       | 0.9230  | -0.9408 | -0.9221 | 0.9004  | 0.8343  | -0.8394 | 0.8384  |
| 1424133_at   | transmembrane protein 98                                    | Tmem98                      | 0.9660  | -0.9314 | -0.9110 | 0.8250  | 0.8159  | -0.7793 | 0.6816  |
| 1424167_a_at | phosphomannomutase 1                                        | Pmm1                        | 0.9490  | -0.9496 | -0.9216 | 0.8755  | 0.8411  | -0.8153 | 0.8389  |
| 1424245_at   | carboxylesterase 2 /// similar to Carboxylesterase 1        | Ces2 /// LOC66775           | 0.8672  | -0.7931 | -0.7886 | 0.6720  | 0.8402  | -0.6520 | 0.4541  |

|              |                                                                       |               |         |         |         |         |         |         |         |
|--------------|-----------------------------------------------------------------------|---------------|---------|---------|---------|---------|---------|---------|---------|
| 1424273_at   | cytochrome P450, family 2, subfamily c, polypeptic Cyp2c70            |               | -0.9412 | 0.9262  | 0.8218  | -0.7804 | -0.6620 | 0.8730  | -0.6986 |
| 1424282_at   | PET112-like (yeast)                                                   | Pet112l       | 0.9026  | -0.8838 | -0.8942 | 0.8589  | 0.8552  | -0.6625 | 0.7095  |
| 1424352_at   | cytochrome P450, family 4, subfamily a, polypeptic Cyp4a12b /// Cyp4: |               | 0.8253  | -0.8771 | -0.8525 | 0.9037  | 0.8305  | -0.7973 | 0.7880  |
| 1424367_a_at | homer homolog 2 (Drosophila)                                          | Homer2        | -0.9040 | 0.9565  | 0.9706  | -0.9581 | -0.8514 | 0.7689  | -0.7360 |
| 1424401_at   | aldehyde dehydrogenase 1 family, member L1                            | Aldh1l1       | -0.8875 | 0.8661  | 0.9016  | -0.8188 | -0.7527 | 0.8070  | -0.7277 |
| 1424715_at   | retinol saturase (all trans retinol 13,14 reductase)                  | Retsat        | 0.9258  | -0.9217 | -0.8905 | 0.8748  | 0.8353  | -0.8485 | 0.8512  |
| 1424716_at   | retinol saturase (all trans retinol 13,14 reductase)                  | Retsat        | 0.9467  | -0.9534 | -0.9479 | 0.9365  | 0.8894  | -0.8529 | 0.8187  |
| 1424790_at   | solute carrier family 25, member 42                                   | Slc25a42      | 0.8848  | -0.8784 | -0.8343 | 0.8642  | 0.7324  | -0.8820 | 0.8365  |
| 1424826_s_at | metastasis suppressor 1                                               | Mtss1         | -0.9087 | 0.9367  | 0.9592  | -0.9477 | -0.9090 | 0.7460  | -0.7064 |
| 1424835_at   | glutathione S-transferase, mu 4                                       | Gstm4         | 0.9534  | -0.9266 | -0.8678 | 0.7958  | 0.7378  | -0.8140 | 0.7695  |
| 1424869_at   | dehydrogenase/reductase (SDR family) member 7 Dhrr7b /// LOC100       |               | 0.9458  | -0.9187 | -0.9225 | 0.8676  | 0.8440  | -0.7662 | 0.6511  |
| 1424904_at   | RIKEN cDNA 1300010F03 gene                                            | 1300010F03Rik | 0.9674  | -0.9244 | -0.8733 | 0.7856  | 0.7110  | -0.8003 | 0.6728  |
| 1424934_at   | UDP glucuronosyltransferase 2 family, polypeptide Ugt2b1              |               | -0.9688 | 0.9768  | 0.9519  | -0.8859 | -0.8574 | 0.8576  | -0.7194 |
| 1424943_at   | cytochrome P450, family 4, subfamily a, polypeptic Cyp4a31            |               | 0.9187  | -0.9321 | -0.9125 | 0.8966  | 0.7602  | -0.8351 | 0.7511  |
| 1425028_a_at | tropomyosin 2, beta                                                   | Tpm2          | 0.9629  | -0.9322 | -0.9134 | 0.8576  | 0.8538  | -0.8296 | 0.7254  |
| 1425109_at   | solute carrier family 44, member 3                                    | Slc44a3       | 0.7893  | -0.8690 | -0.8715 | 0.9119  | 0.6712  | -0.7593 | 0.8487  |
| 1425120_x_at | RIKEN cDNA 1810023F06 gene                                            | 1810023F06Rik | 0.6932  | -0.6626 | -0.7246 | 0.6565  | 0.6431  | -0.4366 | 0.5489  |
| 1425409_at   | cholinergic receptor, nicotinic, alpha polypeptide 2                  | Chrna2        | 0.9170  | -0.8472 | -0.8037 | 0.7808  | 0.7557  | -0.8145 | 0.8461  |
| 1425623_a_at | cystathionine beta-synthase                                           | Cbs           | -0.9328 | 0.8910  | 0.8402  | -0.7980 | -0.6901 | 0.8777  | -0.7731 |
| 1425751_at   | cDNA sequence BC014805                                                | BC014805      | -0.8574 | 0.8936  | 0.9256  | -0.9172 | -0.8477 | 0.7437  | -0.7727 |
| 1425752_at   | cDNA sequence BC014805                                                | BC014805      | -0.8429 | 0.8808  | 0.9038  | -0.8855 | -0.8483 | 0.7015  | -0.7458 |
| 1425948_a_at | solute carrier family 25, member 30                                   | Slc25a30      | 0.8561  | -0.8008 | -0.8193 | 0.7656  | 0.6633  | -0.6992 | 0.6966  |
| 1425964_x_at | heat shock protein 1                                                  | Hspb1         | 0.8550  | -0.8918 | -0.8363 | 0.8664  | 0.7336  | -0.8354 | 0.9473  |
| 1426146_a_at | choline phosphotransferase 1                                          | Chpt1         | 0.9564  | -0.9634 | -0.9128 | 0.8832  | 0.7911  | -0.8838 | 0.7974  |
| 1426389_at   | calcium/calmodulin-dependent protein kinase ID                        | Camk1d        | -0.8915 | 0.8404  | 0.8679  | -0.8341 | -0.8129 | 0.8210  | -0.7759 |
| 1426452_a_at | RAB30, member RAS oncogene family                                     | Rab30         | 0.9378  | -0.9024 | -0.8725 | 0.8589  | 0.8353  | -0.8936 | 0.8581  |
| 1426785_s_at | monoglyceride lipase                                                  | Mgll          | 0.9344  | -0.9166 | -0.8899 | 0.8255  | 0.6875  | -0.8503 | 0.7961  |
| 1426857_a_at | hydroxysteroid dehydrogenase like 2                                   | Hsd12         | 0.9787  | -0.9557 | -0.9343 | 0.8877  | 0.8286  | -0.8935 | 0.7874  |
| 1426989_at   | calsyntenin 3                                                         | Clstn3        | 0.9258  | -0.9243 | -0.9197 | 0.8551  | 0.7359  | -0.7536 | 0.7321  |
| 1427005_at   | polo-like kinase 2 (Drosophila)                                       | Plk2          | 0.6930  | -0.6751 | -0.7886 | 0.7954  | 0.7741  | -0.4658 | 0.4888  |
| 1427126_at   | heat shock protein 1B                                                 | Hspa1b        | 0.8210  | -0.8663 | -0.8006 | 0.8773  | 0.6981  | -0.7821 | 0.6703  |
| 1427347_s_at | tubulin, beta 2a                                                      | Tubb2a        | 0.8096  | -0.8313 | -0.7955 | 0.8428  | 0.8882  | -0.7678 | 0.7743  |
| 1427472_a_at | complement component 8, beta subunit                                  | C8b           | -0.9278 | 0.8777  | 0.7369  | -0.6408 | -0.6073 | 0.8889  | -0.6102 |
| 1427604_a_at | ATPase, class II, type 9A                                             | Atp9a         | 0.9386  | -0.9354 | -0.9391 | 0.9018  | 0.8213  | -0.7578 | 0.7518  |
| 1427631_x_at | major urinary protein 3                                               | Mup3          | -0.9292 | 0.9314  | 0.9466  | -0.8871 | -0.7987 | 0.9175  | -0.6863 |
| 1427943_at   | acylphosphatase 2, muscle type                                        | Acyp2         | 0.8739  | -0.8736 | -0.8954 | 0.9008  | 0.7751  | -0.7631 | 0.7923  |
| 1427981_a_at | cysteine sulfinic acid decarboxylase                                  | Csad          | 0.8526  | -0.8816 | -0.8778 | 0.8784  | 0.7550  | -0.8106 | 0.9141  |
| 1428083_at   | RIKEN cDNA 2310043N10 gene                                            | 2310043N10Rik | 0.9250  | -0.9522 | -0.9510 | 0.8835  | 0.7751  | -0.7868 | 0.7346  |

|              |                                                       |                    |         |         |         |         |         |         |         |
|--------------|-------------------------------------------------------|--------------------|---------|---------|---------|---------|---------|---------|---------|
| 1428176_at   | endothelial differentiation, sphingolipid G-protein-c | Edg5               | 0.8390  | -0.8342 | -0.8797 | 0.7814  | 0.7702  | -0.7043 | 0.7229  |
| 1428372_at   | suppression of tumorigenicity 5                       | St5                | 0.9026  | -0.9089 | -0.9092 | 0.9392  | 0.9144  | -0.8074 | 0.7773  |
| 1428512_at   | basic helix-loop-helix domain containing, class B9    | Bhlhb9             | 0.9110  | -0.9192 | -0.9312 | 0.8717  | 0.7317  | -0.7700 | 0.7107  |
| 1428559_at   | 3-ketodihydrospingosine reductase                     | Kdsr               | 0.9160  | -0.8978 | -0.9261 | 0.8244  | 0.8348  | -0.7663 | 0.6984  |
| 1428739_at   | RIKEN cDNA 2310040A07 gene                            | 2310040A07Rik      | -0.9608 | 0.9320  | 0.8286  | -0.7474 | -0.7444 | 0.7910  | -0.7512 |
| 1428803_at   | acyl-CoA thioesterase 6                               | Acot6              | 0.8961  | -0.9201 | -0.9364 | 0.8921  | 0.7948  | -0.8192 | 0.8040  |
| 1429154_at   | solute carrier family 35, member F2 /// similar to Sc | Slc35f2 /// LOC100 | 0.9013  | -0.8737 | -0.8285 | 0.8390  | 0.8434  | -0.7812 | 0.7899  |
| 1429212_a_at | leucine rich repeat containing 51                     | Lrrc51             | 0.9074  | -0.8855 | -0.8877 | 0.8949  | 0.8401  | -0.7368 | 0.7233  |
| 1429399_at   | ring finger protein 125                               | Rnf125             | 0.8820  | -0.8838 | -0.9273 | 0.8869  | 0.9409  | -0.7700 | 0.6504  |
| 1429523_a_at | solute carrier family 39 (metal ion transporter), mer | Slc39a5            | 0.9655  | -0.9497 | -0.9266 | 0.8900  | 0.8823  | -0.8227 | 0.8226  |
| 1429570_at   | mixed lineage kinase domain-like                      | Mlkl               | 0.6880  | -0.7077 | -0.8279 | 0.8007  | 0.6819  | -0.4832 | 0.4790  |
| 1429786_a_at | ZW10 interactor                                       | Zwint              | 0.9627  | -0.9696 | -0.9174 | 0.8958  | 0.8766  | -0.8570 | 0.7953  |
| 1429859_a_at | ADP-ribosylation factor-like 2 binding protein        | Arl2bp             | 0.8600  | -0.8747 | -0.8914 | 0.8157  | 0.7220  | -0.6876 | 0.6780  |
| 1429947_a_at | Z-DNA binding protein 1                               | Zbp1               | 0.8399  | -0.8726 | -0.8958 | 0.7906  | 0.8110  | -0.7069 | 0.4189  |
| 1430307_a_at | malic enzyme 1, NADP(+)-dependent, cytosolic ///      | Mod1               | 0.9697  | -0.9309 | -0.9019 | 0.8509  | 0.8448  | -0.8549 | 0.7585  |
| 1430388_a_at | sulfatase 2                                           | Sulf2              | 0.7908  | -0.8498 | -0.8614 | 0.9318  | 0.7780  | -0.6931 | 0.8094  |
| 1430700_a_at | phospholipase A2, group VII (platelet-activating fac  | Pla2g7             | 0.8592  | -0.8612 | -0.8472 | 0.8336  | 0.8914  | -0.7385 | 0.6244  |
| 1430780_a_at | phosphomannomutase 1                                  | Pmm1               | 0.9562  | -0.9683 | -0.9398 | 0.8830  | 0.8679  | -0.7977 | 0.7503  |
| 1431056_a_at | lipoprotein lipase                                    | Lpl                | 0.8904  | -0.8995 | -0.9343 | 0.8864  | 0.8929  | -0.7468 | 0.7225  |
| 1431278_s_at | phospholipase A2, group VI                            | Pla2g6             | 0.8494  | -0.8281 | -0.8511 | 0.7694  | 0.6368  | -0.6567 | 0.6441  |
| 1432517_a_at | nicotinamide N-methyltransferase                      | Nnmt               | -0.9629 | 0.9357  | 0.9059  | -0.8610 | -0.7724 | 0.9214  | -0.7650 |
| 1432543_a_at | Kruppel-like factor 13                                | Klf13              | -0.9021 | 0.9559  | 1.0000  | -0.9624 | -0.8529 | 0.8300  | -0.6651 |
| 1432562_at   | RIKEN cDNA 1110006G14 gene                            | 1110006G14Rik      | 0.8840  | -0.8937 | -0.9266 | 0.8930  | 0.8407  | -0.7923 | 0.7864  |
| 1433601_at   | adrenergic receptor, alpha 2a                         | Adra2a             | 0.8590  | -0.8772 | -0.8610 | 0.9117  | 0.8654  | -0.7926 | 0.7656  |
| 1433691_at   | protein phosphatase 1, regulatory (inhibitor) subun   | Ppp1r3c            | 0.8019  | -0.8259 | -0.7806 | 0.7793  | 0.8958  | -0.7389 | 0.6626  |
| 1433779_at   | cancer susceptibility candidate 4                     | Casc4              | 0.9048  | -0.9460 | -0.9274 | 0.9430  | 0.8231  | -0.7998 | 0.7572  |
| 1433898_at   | ---                                                   | ---                | 0.8812  | -0.8578 | -0.8366 | 0.8436  | 0.7220  | -0.8196 | 0.7981  |
| 1433924_at   | ---                                                   | ---                | 0.7852  | -0.8616 | -0.8026 | 0.8475  | 0.6857  | -0.8133 | 0.9103  |
| 1434036_at   | metastasis suppressor 1                               | Mtss1              | -0.9733 | 0.9825  | 0.9519  | -0.9182 | -0.8722 | 0.8899  | -0.7425 |
| 1434089_at   | synaptopodin                                          | Synpo              | 0.8551  | -0.8033 | -0.8402 | 0.7588  | 0.7485  | -0.6330 | 0.6689  |
| 1434109_at   | SH3 domain binding glutamic acid-rich protein like    | Sh3bgrl2           | 0.9289  | -0.9326 | -0.9223 | 0.8935  | 0.7272  | -0.8655 | 0.8004  |
| 1434170_at   | WD repeat domain 40B                                  | Wdr40b             | 0.8705  | -0.9221 | -0.9761 | 0.9311  | 0.7807  | -0.8664 | 0.6686  |
| 1434382_at   | serine incorporator 2 /// hypothetical protein LOC1   | Serinc2 /// LOC100 | 0.9585  | -0.9540 | -0.9123 | 0.8772  | 0.7879  | -0.8406 | 0.8521  |
| 1434465_x_at | very low density lipoprotein receptor                 | Vldlr              | 0.9387  | -0.9299 | -0.9377 | 0.8689  | 0.8402  | -0.7617 | 0.7623  |
| 1434582_at   | ELKS/RAB6-interacting/CAST family member 2            | Erc2               | 0.8040  | -0.8353 | -0.8372 | 0.8190  | 0.7264  | -0.7328 | 0.9023  |
| 1434599_a_at | tight junction protein 2                              | Tjp2               | 0.8474  | -0.8986 | -0.9507 | 0.9645  | 0.8304  | -0.7599 | 0.6033  |
| 1434642_at   | hydroxysteroid (17-beta) dehydrogenase 11             | Hsd17b11           | 0.9143  | -0.9241 | -0.9053 | 0.8893  | 0.8386  | -0.8311 | 0.8461  |
| 1434671_at   | RIKEN cDNA B230337E12 gene                            | B230337E12Rik      | 0.9511  | -0.9444 | -0.9019 | 0.8950  | 0.7589  | -0.8276 | 0.7734  |

|              |                                                        |                       |         |         |         |         |         |         |         |
|--------------|--------------------------------------------------------|-----------------------|---------|---------|---------|---------|---------|---------|---------|
| 1434897_at   | solute carrier family 25 (mitochondrial carrier, ader  | Slc25a4               | 0.9358  | -0.9329 | -0.9235 | 0.8879  | 0.8410  | -0.7652 | 0.6603  |
| 1435084_at   | RIKEN cDNA C730049O14 gene                             | C730049O14Rik         | 0.8774  | -0.8971 | -0.9249 | 0.8994  | 0.9474  | -0.7729 | 0.7465  |
| 1435196_at   | neurotrophic tyrosine kinase, receptor, type 2         | Ntrk2                 | -0.8512 | 0.8252  | 0.8490  | -0.8264 | -0.7255 | 0.8608  | -0.7081 |
| 1435245_at   | glutaminase 2 (liver, mitochondrial)                   | Gls2                  | -0.9390 | 0.8996  | 0.7825  | -0.7172 | -0.6289 | 0.9133  | -0.6751 |
| 1435254_at   | plexin B1                                              | Plxnb1                | -0.9500 | 0.9251  | 0.9363  | -0.9052 | -0.9144 | 0.8374  | -0.6827 |
| 1435255_at   | plexin B1                                              | Plxnb1                | -0.9639 | 0.9463  | 0.8956  | -0.8256 | -0.7494 | 0.8825  | -0.7279 |
| 1435275_at   | cytochrome c oxidase subunit VIb polypeptide 2         | Cox6b2                | 0.9506  | -0.9391 | -0.9449 | 0.9059  | 0.8975  | -0.8192 | 0.7595  |
| 1435394_s_at | ras homolog gene family, member C                      | Rhoc                  | 0.8184  | -0.8442 | -0.9041 | 0.9355  | 0.8673  | -0.6626 | 0.7734  |
| 1435446_a_at | choline phosphotransferase 1                           | Chpt1                 | 0.9546  | -0.9691 | -0.9192 | 0.8963  | 0.8666  | -0.8883 | 0.8266  |
| 1435549_at   | transient receptor potential cation channel, subfam    | Trpm4                 | 0.9351  | -0.9565 | -0.9224 | 0.8971  | 0.7893  | -0.7860 | 0.7814  |
| 1435658_at   | solute carrier family 27 (fatty acid transporter), mer | Slc27a1               | 0.9154  | -0.8994 | -0.8940 | 0.8117  | 0.6989  | -0.7268 | 0.6375  |
| 1435666_at   | microtubule associated serine/threonine kinase 3       | Mast3                 | -0.9113 | 0.9113  | 0.9278  | -0.8761 | -0.7732 | 0.7618  | -0.7737 |
| 1435893_at   | very low density lipoprotein receptor                  | Vldlr                 | 0.9034  | -0.9037 | -0.9409 | 0.8844  | 0.8967  | -0.7458 | 0.7274  |
| 1435902_at   | nudix (nucleoside diphosphate linked moiety X)-tyr     | Nudt18                | 0.8233  | -0.8761 | -0.9035 | 0.8669  | 0.7693  | -0.7217 | 0.6740  |
| 1435963_at   | sema domain, seven thrombospondin repeats (typ         | Sema5b                | 0.8716  | -0.8817 | -0.7967 | 0.7947  | 0.6854  | -0.7903 | 0.7825  |
| 1436038_a_at | phosphatidylinositol glycan anchor biosynthesis, cl    | Pipg                  | 0.8932  | -0.8877 | -0.9275 | 0.8863  | 0.7831  | -0.7586 | 0.7611  |
| 1436186_at   | E2F transcription factor 8                             | E2f8                  | 0.7303  | -0.7324 | -0.6651 | 0.6987  | 0.6344  | -0.6918 | 1.0000  |
| 1436313_at   | SCY1-like 2 (S. cerevisiae)                            | Scyl2                 | 0.9317  | -0.9528 | -0.9399 | 0.9196  | 0.8759  | -0.8507 | 0.8189  |
| 1436314_at   | SCY1-like 2 (S. cerevisiae)                            | Scyl2                 | 0.9022  | -0.9548 | -0.9187 | 0.9289  | 0.7745  | -0.9056 | 0.8391  |
| 1436504_x_at | apolipoprotein A-IV                                    | Apoa4                 | -0.9819 | 0.9882  | 0.9459  | -0.8851 | -0.7958 | 0.9207  | -0.7083 |
| 1436890_at   | UDP-N-acteylglucosamine pyrophosphorylase 1-li         | Uap1l1                | 0.9379  | -0.9245 | -0.8725 | 0.8116  | 0.7241  | -0.7914 | 0.7803  |
| 1436994_a_at | histone cluster 1, H1c                                 | Hist1h1c              | 0.7889  | -0.8325 | -0.9074 | 0.9185  | 0.8748  | -0.7532 | 0.6996  |
| 1437040_at   | ethanolamine kinase 2                                  | Etnk2                 | -0.9012 | 0.9240  | 0.9638  | -0.9429 | -0.8611 | 0.7594  | -0.7592 |
| 1437073_x_at | ---                                                    | ---                   | 0.8202  | -0.7767 | -0.7672 | 0.7568  | 0.6414  | -0.7449 | 0.8286  |
| 1437455_a_at | B-cell translocation gene 1, anti-proliferative ///    | sim Btg1 /// LOC10004 | 0.9016  | -0.9124 | -0.9421 | 0.9119  | 0.9173  | -0.8783 | 0.7286  |
| 1437496_at   | RIKEN cDNA 9330129D05 gene                             | 9330129D05Rik         | 0.9424  | -0.9282 | -0.9213 | 0.8357  | 0.8335  | -0.7932 | 0.6422  |
| 1437580_s_at | NIMA (never in mitosis gene a)-related expressed       | Nek2                  | 0.9340  | -0.8772 | -0.8176 | 0.7252  | 0.8397  | -0.7686 | 0.7219  |
| 1437590_at   | RIKEN cDNA 4833409A17 gene                             | 4833409A17Rik         | 0.8432  | -0.7898 | -0.8473 | 0.7959  | 0.8304  | -0.6734 | 0.6792  |
| 1437724_x_at | phosphatidylinositol membrane-associated 1             | Pitpnm1               | 0.9317  | -0.9330 | -0.9203 | 0.9131  | 0.9330  | -0.8442 | 0.7276  |
| 1438001_x_at | receptor accessory protein 5                           | Reep5                 | 0.8114  | -0.8316 | -0.8351 | 0.7873  | 0.6414  | -0.6636 | 0.8270  |
| 1438258_at   | very low density lipoprotein receptor                  | Vldlr                 | 0.8858  | -0.9517 | -0.9351 | 0.8730  | 0.8367  | -0.7701 | 0.6638  |
| 1438310_at   | ---                                                    | ---                   | 0.9361  | -0.9428 | -0.9497 | 0.9299  | 0.8227  | -0.8046 | 0.7808  |
| 1438448_at   | otopetrin 1                                            | Otop1                 | 0.9455  | -0.9453 | -0.9340 | 0.9308  | 0.8581  | -0.8084 | 0.7307  |
| 1438659_x_at | coiled-coil-helix-coiled-coil-helix domain containing  | Chchd6                | 0.8848  | -0.8468 | -0.8478 | 0.7422  | 0.7671  | -0.6916 | 0.6220  |
| 1438676_at   | macrophage activation 2 like                           | Mpa2l                 | 0.8990  | -0.9212 | -0.9299 | 0.8377  | 0.8458  | -0.7689 | 0.5602  |
| 1438740_at   | N-myristoyltransferase 2                               | Nmt2                  | 0.9132  | -0.8787 | -0.8675 | 0.8186  | 0.7178  | -0.8198 | 0.7959  |
| 1439293_at   | cDNA sequence BC031353                                 | BC031353              | -0.8025 | 0.8446  | 0.9408  | -0.9436 | -0.8569 | 0.7311  | -0.7377 |
| 1439478_at   | acyl-CoA thioesterase 2                                | Acot2                 | 0.9129  | -0.9089 | -0.8844 | 0.8635  | 0.8671  | -0.7950 | 0.8454  |

|              |                                                                      |               |         |         |         |         |         |         |         |
|--------------|----------------------------------------------------------------------|---------------|---------|---------|---------|---------|---------|---------|---------|
| 1439795_at   | G protein-coupled receptor 64                                        | Gpr64         | 0.8972  | -0.8711 | -0.7897 | 0.7644  | 0.5928  | -0.8212 | 0.8323  |
| 1440134_at   | cytochrome P450, family 4, subfamily a, polypeptide Cyp4a31          | Cyp4a31       | 0.9451  | -0.9576 | -0.9514 | 0.9192  | 0.8637  | -0.8507 | 0.8182  |
| 1440178_x_at | zeta-chain (TCR) associated protein kinase                           | Zap70         | -0.8929 | 0.9030  | 0.8864  | -0.8084 | -0.6943 | 0.9676  | -0.5597 |
| 1441768_at   | RIKEN cDNA 9430051O21 gene                                           | 9430051O21Rik | -0.9060 | 0.9253  | 0.9285  | -0.8880 | -0.7867 | 0.8493  | -0.8657 |
| 1441919_x_at | carnitine acetyltransferase                                          | Crat          | 0.8241  | -0.7839 | -0.7740 | 0.6700  | 0.6193  | -0.7744 | 0.7751  |
| 1441971_at   | ---                                                                  | ---           | 0.9240  | -0.9599 | -0.9317 | 0.9129  | 0.8062  | -0.8907 | 0.8734  |
| 1442331_at   | ---                                                                  | ---           | -0.9603 | 0.9799  | 0.9640  | -0.8936 | -0.8168 | 0.9128  | -0.6970 |
| 1442508_at   | RIKEN cDNA 4933404M19 gene                                           | 4933404M19Rik | 0.9277  | -0.9608 | -0.9541 | 0.9318  | 0.8127  | -0.8275 | 0.8368  |
| 1443180_at   | ---                                                                  | ---           | -0.9762 | 0.9590  | 0.8751  | -0.8124 | -0.7267 | 0.9193  | -0.7757 |
| 1443603_at   | ---                                                                  | ---           | -0.8942 | 0.8823  | 0.8811  | -0.8107 | -0.6588 | 0.8235  | -0.6565 |
| 1443870_at   | ATP-binding cassette, sub-family C (CFTR/MRP), Abcc4                 | Abcc4         | 0.9441  | -0.9293 | -0.9463 | 0.8685  | 0.8500  | -0.7637 | 0.6702  |
| 1443902_at   | RIKEN cDNA 6430573F11 gene                                           | 6430573F11Rik | 0.9086  | -0.9144 | -0.9028 | 0.9110  | 0.7988  | -0.8235 | 0.6948  |
| 1445597_s_at | HRAS like suppressor 3                                               | Hrasls3       | 0.9032  | -0.9119 | -0.8287 | 0.7148  | 0.7083  | -0.7199 | 0.5934  |
| 1446284_at   | metastasis suppressor 1                                              | Mtss1         | -0.8919 | 0.9057  | 0.9124  | -0.9158 | -0.8270 | 0.7601  | -0.8475 |
| 1446423_at   | ---                                                                  | ---           | 0.9377  | -0.9274 | -0.8948 | 0.8499  | 0.8665  | -0.8703 | 0.8336  |
| 1447186_at   | solute carrier family 6, member 16                                   | Slc6a16       | 0.9406  | -0.9312 | -0.8759 | 0.7947  | 0.6723  | -0.7656 | 0.5960  |
| 1447458_at   | ---                                                                  | ---           | -0.9313 | 0.9441  | 0.9633  | -0.8664 | -0.8200 | 0.8385  | -0.5819 |
| 1447602_x_at | sulfatase 2                                                          | Sulf2         | 0.6541  | -0.7358 | -0.7783 | 0.8146  | 0.6208  | -0.5572 | 0.8478  |
| 1447774_x_at | RIKEN cDNA 5730469M10 gene                                           | 5730469M10Rik | 0.8846  | -0.8674 | -0.8666 | 0.7970  | 0.7915  | -0.7372 | 0.5693  |
| 1447845_s_at | vanin 1                                                              | Vnn1          | 0.9790  | -0.9552 | -0.9237 | 0.8798  | 0.8415  | -0.8723 | 0.8120  |
| 1447919_x_at | NADH dehydrogenase (ubiquinone) 1, alpha/beta : Ndufab1              | Ndufab1       | 0.9080  | -0.9321 | -0.9536 | 0.9243  | 0.8184  | -0.8017 | 0.7581  |
| 1447927_at   | macrophage activation 2 like /// macrophage activε Mpa2l /// LOC6265 | Mpa2l         | 0.8670  | -0.8839 | -0.9000 | 0.8194  | 0.9124  | -0.7684 | 0.5701  |
| 1448188_at   | uncoupling protein 2 (mitochondrial, proton carrier) Ucp2            | Ucp2          | 0.8973  | -0.8537 | -0.8564 | 0.7454  | 0.7230  | -0.6601 | 0.5566  |
| 1448361_at   | tetratricopeptide repeat domain 3                                    | Ttc3          | 0.8956  | -0.9084 | -0.9294 | 0.8899  | 0.7893  | -0.7576 | 0.8256  |
| 1448382_at   | enoyl-Coenzyme A, hydratase/3-hydroxyacyl Coer Ehhadh                | Ehhadh        | 0.9400  | -0.9336 | -0.9297 | 0.9064  | 0.9065  | -0.8384 | 0.8269  |
| 1448694_at   | Jun oncogene                                                         | Jun           | 0.7580  | -0.7759 | -0.8192 | 0.8449  | 0.9721  | -0.6291 | 0.6266  |
| 1448700_at   | G0/G1 switch gene 2                                                  | G0s2          | 0.7951  | -0.7627 | -0.7077 | 0.6555  | 0.6829  | -0.6155 | 0.9029  |

|              |                                                                                                   |                        |         |         |         |         |         |         |         |
|--------------|---------------------------------------------------------------------------------------------------|------------------------|---------|---------|---------|---------|---------|---------|---------|
| 1448752_at   | carbonic anhydrase 2                                                                              | Car2                   | 0.9261  | -0.8885 | -0.8580 | 0.7787  | 0.6974  | -0.7069 | 0.6587  |
| 1448927_at   | potassium intermediate/small conductance calcium-activated potassium channel subfamily A member 2 | Kcnn2                  | -0.9351 | 0.9230  | 0.8913  | -0.8594 | -0.7746 | 0.7314  | -0.7781 |
| 1448986_x_at | ---                                                                                               | ---                    | 0.8679  | -0.8814 | -0.8699 | 0.8636  | 0.7638  | -0.7889 | 0.8199  |
| 1448989_a_at | myosin IB                                                                                         | Myo1b                  | -0.8088 | 0.8206  | 0.9100  | -0.8889 | -0.8039 | 0.6367  | -0.6938 |
| 1449038_at   | hydroxysteroid 11-beta dehydrogenase 1                                                            | Hsd11b1                | -0.9776 | 0.9640  | 0.9204  | -0.8813 | -0.7859 | 0.8968  | -0.7545 |
| 1449065_at   | acyl-CoA thioesterase 1 /// similar to acyl-CoA thioesterase 1 /// LOC100020001                   | Acot1 /// LOC100020001 | 0.9685  | -0.9537 | -0.9367 | 0.8984  | 0.8621  | -0.8576 | 0.8249  |
| 1449079_s_at | ST3 beta-galactoside alpha-2,3-sialyltransferase 6                                                | St3gal6                | 0.8870  | -0.8797 | -0.8492 | 0.7540  | 0.6100  | -0.6886 | 0.5197  |
| 1449442_at   | peroxisomal biogenesis factor 11a                                                                 | Pex11a                 | 0.9726  | -0.9283 | -0.8737 | 0.8019  | 0.7888  | -0.8389 | 0.8281  |
| 1449577_x_at | tropomyosin 2, beta                                                                               | Tpm2                   | 0.9122  | -0.9318 | -0.9199 | 0.8826  | 0.8702  | -0.7260 | 0.7869  |
| 1449619_s_at | Rho GTPase activating protein 9                                                                   | Arhgap9                | 0.8682  | -0.8482 | -0.8544 | 0.7969  | 0.7464  | -0.6649 | 0.6672  |
| 1449773_s_at | growth arrest and DNA-damage-inducible 45 beta                                                    | Gadd45b                | 0.8945  | -0.9332 | -0.9170 | 0.9016  | 0.7945  | -0.9334 | 0.8030  |
| 1449945_at   | peroxisome proliferative activated receptor, gamma                                                | Ppargc1b               | -0.9643 | 0.9771  | 0.8897  | -0.8371 | -0.7420 | 0.9340  | -0.7277 |
| 1450018_s_at | solute carrier family 25, member 30                                                               | Slc25a30               | 0.8441  | -0.8203 | -0.8245 | 0.8239  | 0.7162  | -0.7664 | 0.8494  |
| 1450061_at   | ectodermal-neural cortex 1                                                                        | Enc1                   | 0.9278  | -0.9519 | -0.9189 | 0.8656  | 0.7765  | -0.7670 | 0.6509  |
| 1450243_a_at | regulator of calcineurin 2                                                                        | Rcan2                  | 0.9317  | -0.9193 | -0.8203 | 0.8167  | 0.7635  | -0.7885 | 0.8103  |
| 1450248_at   | alpha disintegrin and metallopeptidase domain 11                                                  | Adam11                 | 0.8869  | -0.9058 | -0.9582 | 0.9150  | 0.8201  | -0.7530 | 0.6076  |
| 1450264_a_at | choline kinase alpha                                                                              | Chka                   | 0.7062  | -0.7733 | -0.7333 | 0.8245  | 0.8102  | -0.6591 | 0.8474  |
| 1450391_a_at | monoglyceride lipase                                                                              | Mgll                   | 0.9711  | -0.9458 | -0.9086 | 0.8691  | 0.8290  | -0.8997 | 0.8449  |
| 1450395_at   | solute carrier family 22 (organic cation transporter)                                             | Slc22a5                | 0.9087  | -0.8760 | -0.8183 | 0.7775  | 0.7224  | -0.7796 | 0.7884  |
| 1450717_at   | angiogenin, ribonuclease, RNase A family, 5                                                       | Ang                    | -0.8825 | 0.8923  | 0.8898  | -0.8941 | -0.7950 | 0.6839  | -0.8008 |
| 1450883_a_at | CD36 antigen                                                                                      | Cd36                   | 0.9572  | -0.9465 | -0.9352 | 0.8850  | 0.8930  | -0.8013 | 0.7879  |
| 1450884_at   | CD36 antigen                                                                                      | Cd36                   | 0.9346  | -0.9438 | -0.9370 | 0.9053  | 0.9140  | -0.7909 | 0.7921  |
| 1450970_at   | glutamate oxaloacetate transaminase 1, soluble                                                    | Got1                   | -0.9195 | 0.8804  | 0.9096  | -0.8404 | -0.7846 | 0.8044  | -0.7449 |
| 1450971_at   | growth arrest and DNA-damage-inducible 45 beta                                                    | Gadd45b                | 0.9087  | -0.9203 | -0.9249 | 0.8867  | 0.8528  | -0.9103 | 0.7401  |
| 1451156_s_at | very low density lipoprotein receptor                                                             | Vldlr                  | 0.8367  | -0.8779 | -0.9249 | 0.8719  | 0.8234  | -0.6331 | 0.5737  |
| 1451290_at   | microtubule-associated protein 1 light chain 3 alpha                                              | Map1lc3a               | 0.9383  | -0.9444 | -0.8738 | 0.8625  | 0.7608  | -0.8690 | 0.8831  |
| 1451421_a_at | rogdi homolog (Drosophila)                                                                        | Rogdi                  | 0.9270  | -0.9453 | -0.9150 | 0.9141  | 0.7629  | -0.8264 | 0.7867  |
| 1451460_a_at | solute carrier family 22 (organic anion transporter), Slc22a7                                     | Slc22a7                | -0.7956 | 0.8083  | 0.9020  | -0.8564 | -0.7876 | 0.7856  | -0.6088 |
| 1451488_at   | RIKEN cDNA 1110028A07 gene                                                                        | 1110028A07Rik          | 0.9471  | -0.9580 | -0.9177 | 0.8584  | 0.7503  | -0.7638 | 0.6808  |
| 1451681_at   | cDNA sequence BC089597                                                                            | BC089597               | -0.9263 | 0.9277  | 0.9470  | -0.9289 | -0.8560 | 0.8233  | -0.8077 |
| 1451788_at   | coagulation factor XI                                                                             | F11                    | -0.9403 | 0.9860  | 0.9645  | -0.9182 | -0.8439 | 0.8163  | -0.7036 |
| 1451798_at   | interleukin 1 receptor antagonist                                                                 | Il1rn                  | 0.8453  | -0.8237 | -0.8912 | 0.8469  | 0.8212  | -0.6122 | 0.6170  |
| 1452050_at   | calcium/calmodulin-dependent protein kinase ID                                                    | Camk1d                 | -0.8606 | 0.8938  | 0.9412  | -0.9473 | -0.7653 | 0.8186  | -0.7564 |
| 1452416_at   | interleukin 6 receptor, alpha                                                                     | Il6ra                  | -0.8235 | 0.8875  | 0.9599  | -0.9650 | -0.8607 | 0.6776  | -0.6915 |
| 1452716_at   | RIKEN cDNA 5730469M10 gene                                                                        | 5730469M10Rik          | 0.9557  | -0.9316 | -0.9314 | 0.8789  | 0.8797  | -0.7812 | 0.6783  |
| 1452864_at   | mediator of RNA polymerase II transcription, subunit 1                                            | Med12l                 | 0.8775  | -0.8880 | -0.8474 | 0.8773  | 0.8400  | -0.7498 | 0.8988  |
| 1452893_s_at | RIKEN cDNA 1110065P19 gene /// RIKEN cDNA 1110065P19Rik ///                                       | 1110065P19Rik ///      | -0.9648 | 0.9635  | 0.9377  | -0.8870 | -0.8600 | 0.7973  | -0.7389 |
| 1453056_at   | solute carrier family 16 (monocarboxylic acid transporter)                                        | Slc16a13               | 0.9033  | -0.8846 | -0.8614 | 0.8883  | 0.8576  | -0.7581 | 0.8595  |



|              |                                                                       |               |         |         |         |         |         |         |         |
|--------------|-----------------------------------------------------------------------|---------------|---------|---------|---------|---------|---------|---------|---------|
| 1453836_a_at | monoglyceride lipase                                                  | Mgli          | 0.9370  | -0.9054 | -0.8754 | 0.8102  | 0.6965  | -0.8561 | 0.7999  |
| 1454078_a_at | galactose-3-O-sulfotransferase 1                                      | Gal3st1       | 0.9036  | -0.8675 | -0.8943 | 0.8163  | 0.7901  | -0.6876 | 0.6907  |
| 1454880_s_at | Bcl2 modifying factor                                                 | Bmf           | -0.9425 | 0.9426  | 0.8488  | -0.7879 | -0.7541 | 0.7422  | -0.7481 |
| 1455025_at   | progesterin and adipoQ receptor family member IX                      | Paqr9         | 0.8787  | -0.8342 | -0.8219 | 0.7756  | 0.6440  | -0.6925 | 0.7104  |
| 1455178_at   | small G protein signaling modulator 2                                 | Sgsm2         | 0.8366  | -0.9009 | -0.9067 | 0.8805  | 0.8907  | -0.8145 | 0.5619  |
| 1455267_at   | estrogen-related receptor gamma                                       | Esrrg         | 1.0000  | -0.9656 | -0.9021 | 0.8367  | 0.8135  | -0.8830 | 0.7303  |
| 1455270_at   | a disintegrin and metallopeptidase domain 11                          | Adam11        | 0.8115  | -0.8558 | -0.9400 | 0.9291  | 0.8744  | -0.6573 | 0.6443  |
| 1455288_at   | RIKEN cDNA 1110036O03 gene                                            | 1110036O03Rik | 0.9432  | -0.8979 | -0.8405 | 0.7887  | 0.7217  | -0.8830 | 0.8544  |
| 1455383_at   | hypothetical protein C730043O17                                       | C730043O17    | -0.9481 | 0.9899  | 0.9780  | -0.9511 | -0.8560 | 0.8504  | -0.7612 |
| 1455439_a_at | lectin, galactose binding, soluble 1                                  | Lgals1        | 0.9555  | -0.9245 | -0.9042 | 0.8502  | 0.8138  | -0.7472 | 0.6978  |
| 1455457_at   | cytochrome P450, family 2, subfamily c, polypeptide Cyp2c54           | Cyp2c54       | -0.8054 | 0.7892  | 0.8593  | -0.8290 | -0.8224 | 0.6964  | -0.7156 |
| 1455520_at   | protein phosphatase 2, regulatory subunit B (B56), Ppp2r5c /// LOC101 | Ppp2r5c       | 0.9121  | -0.8666 | -0.8737 | 0.7695  | 0.7715  | -0.7422 | 0.6700  |
| 1455936_a_at | RNA binding protein gene with multiple splicing                       | Rbpms         | 0.8372  | -0.8402 | -0.8429 | 0.8678  | 0.8707  | -0.7193 | 0.7220  |
| 1456096_at   | RIKEN cDNA 6430573F11 gene                                            | 6430573F11Rik | 0.9222  | -0.9387 | -0.9049 | 0.9120  | 0.9214  | -0.8351 | 0.7543  |
| 1456424_s_at | phospholipid transfer protein                                         | Pltp          | 0.9482  | -0.9315 | -0.9019 | 0.8513  | 0.8741  | -0.8089 | 0.7749  |
| 1456642_x_at | S100 calcium binding protein A10 (calpactin)                          | S100a10       | 0.9176  | -0.9455 | -0.8979 | 0.8989  | 0.8957  | -0.7935 | 0.8038  |
| 1456769_at   | dual specificity phosphatase 3 (vaccinia virus phosphatase 3)         | Dusp3         | 0.9397  | -0.9799 | -0.9549 | 0.9268  | 0.7663  | -0.8408 | 0.7674  |
| 1457213_a_at | diacylglycerol kinase, eta                                            | Dgkh          | 0.8892  | -0.9026 | -0.8964 | 0.8234  | 0.7163  | -0.7863 | 0.8387  |
| 1458701_at   | preimplantation protein 4                                             | Prei4         | -0.9493 | 0.9256  | 0.8969  | -0.8372 | -0.8728 | 0.8439  | -0.7857 |
| 1458829_at   | ---                                                                   | ---           | -0.8774 | 0.7951  | 0.7716  | -0.7627 | -0.7540 | 0.8566  | -0.6951 |
| 1458832_at   | ---                                                                   | ---           | -0.9509 | 0.9273  | 0.8186  | -0.8066 | -0.7626 | 0.8291  | -0.7693 |
| 1459361_at   | ---                                                                   | ---           | -0.9401 | 0.8827  | 0.8985  | -0.8000 | -0.7818 | 0.8079  | -0.6251 |
| 1459686_at   | ---                                                                   | ---           | 0.8605  | -0.9007 | -0.9061 | 0.8852  | 0.7499  | -0.7202 | 0.5994  |
| 1459740_s_at | uncoupling protein 2 (mitochondrial, proton carrier)                  | Ucp2          | 0.8934  | -0.8611 | -0.8626 | 0.7446  | 0.6996  | -0.7124 | 0.6059  |
| 1459741_x_at | uncoupling protein 2 (mitochondrial, proton carrier)                  | Ucp2          | 0.9075  | -0.8773 | -0.8253 | 0.7345  | 0.6818  | -0.6573 | 0.5840  |
| 1460196_at   | carbonyl reductase 1                                                  | Cbr1          | 0.7905  | -0.8309 | -0.8160 | 0.8738  | 0.7425  | -0.7799 | 0.8538  |
| 1460251_at   | Fas (TNF receptor superfamily member 6)                               | Fas           | 0.8204  | -0.7938 | -0.8580 | 0.8295  | 0.8653  | -0.6048 | 0.7092  |

\* The CC values for Jun represent the average of the CC values from each of its two significantly changed probe sets.
