# Supplementary material
Source: PubMed Central journal article supplement (PMC2882619)
Supplement: tpj200951x5.pdf [file tpj200951x5.pdf]

**Supplementary Table 5:** Significantly changed genes, as identified by SAM ( $\geq 2$  fold and 0% FDR), with expression patterns highly similar to *Arid5b* ( $CC \geq 0.9400$ ). The Gene Ontology (GO) biological process, molecular function and cellular localization is provided for each of these genes.

| CC to Arid5b | Affy ID      | Gene Name                                                              | Symbol                               | GO Biological Process                                                                                                                                                                                              | GO Molecular Function                                                                                                                                                                                                                                                                                                                                                        | GO Cellular Component                                                                                                                                                        |
|--------------|--------------|------------------------------------------------------------------------|--------------------------------------|--------------------------------------------------------------------------------------------------------------------------------------------------------------------------------------------------------------------|------------------------------------------------------------------------------------------------------------------------------------------------------------------------------------------------------------------------------------------------------------------------------------------------------------------------------------------------------------------------------|------------------------------------------------------------------------------------------------------------------------------------------------------------------------------|
| 0.9899       | 1455383_a_t  | hypothetical protein C730043O17                                        | C730043O17                           | ---                                                                                                                                                                                                                | ---                                                                                                                                                                                                                                                                                                                                                                          | ---                                                                                                                                                                          |
| 0.9882       | 1436504_x_at | apolipoprotein A-IV                                                    | Apoa4                                | innate immune response in mucosa<br>/// transport /// lipid transport ///<br>regulation of cholesterol absorption ///<br>lipoprotein metabolic process                                                             | lipid transporter activity /// lipid binding                                                                                                                                                                                                                                                                                                                                 | extracellular region /// extracellular space<br>/// extracellular space /// chylomicron                                                                                      |
| 0.9860       | 1451788_a_t  | coagulation factor XI                                                  | F11                                  | proteolysis /// blood coagulation ///<br>regulation of blood coagulation                                                                                                                                           | coagulation factor XIa activity ///<br>catalytic activity /// serine-type<br>endopeptidase activity /// heparin<br>binding /// peptidase activity ///<br>hydrolase activity                                                                                                                                                                                                  | extracellular region                                                                                                                                                         |
| 0.9825       | 1434036_a_t  | metastasis suppressor 1                                                | Mtss1                                | actin filament organization /// signal<br>transduction /// nervous system<br>development /// nervous system<br>development /// muscle development<br>/// actin filament polymerization ///<br>filopodium formation | actin binding /// actin binding /// actin<br>monomer binding /// receptor<br>binding                                                                                                                                                                                                                                                                                         | cytoplasm /// cytoplasm /// cytoskeleton ///<br>actin cytoskeleton                                                                                                           |
| 0.9799       | 1442331_a_t  | ---                                                                    | ---                                  | ---                                                                                                                                                                                                                | ---                                                                                                                                                                                                                                                                                                                                                                          | ---                                                                                                                                                                          |
| 0.9771       | 1449945_a_t  | peroxisome proliferative activated receptor, gamma, coactivator 1 beta | Ppargc1b                             | transcription /// regulation of<br>transcription, DNA-dependent ///<br>estrogen receptor signaling pathway<br>/// positive regulation of transcription<br>from RNA polymerase II promoter                          | nucleotide binding /// nucleic acid<br>binding /// RNA binding /// protein<br>binding /// ligand-dependent nuclear<br>receptor transcription coactivator<br>activity /// AF-2 domain binding                                                                                                                                                                                 | nucleus /// nucleus                                                                                                                                                          |
| 0.9768       | 1424934_a_t  | UDP glucuronosyltransferase 2 family, polypeptide B1                   | Ugt2b1                               | metabolic process /// metabolic<br>process                                                                                                                                                                         | glucuronosyltransferase activity ///<br>glucuronosyltransferase activity ///<br>transferase activity /// transferase<br>activity /// transferase activity,<br>transferring glycosyl groups ///<br>transferase activity, transferring<br>glycosyl groups /// transferase<br>activity, transferring hexosyl groups<br>/// transferase activity, transferring<br>hexosyl groups | microsome /// integral to membrane                                                                                                                                           |
| 0.9730       | 1417761_a_t  | apolipoprotein A-IV                                                    | Apoa4                                | innate immune response in mucosa<br>/// transport /// lipid transport ///<br>regulation of cholesterol absorption ///<br>lipoprotein metabolic process                                                             | lipid transporter activity /// lipid<br>binding                                                                                                                                                                                                                                                                                                                              | extracellular region /// extracellular space<br>/// extracellular space /// chylomicron                                                                                      |
| 0.9710       | 1419559_a_t  | cytochrome P450, Cyp4f14 family 4, subfamily f, polypeptide 14         | Cyp4f14                              | oxidation reduction                                                                                                                                                                                                | monooxygenase activity /// iron ion<br>binding /// electron carrier activity ///<br>oxidoreductase activity /// heme<br>binding /// metal ion binding ///<br>leukotriene-B4 20-monooxygenase<br>activity                                                                                                                                                                     | extracellular space /// endoplasmic<br>reticulum /// endoplasmic reticulum ///<br>endoplasmic reticulum membrane ///<br>microsome /// microsome /// membrane ///<br>membrane |
| 0.9679       | 1421214_a_t  | cytidine monophospho-N-acetylneuraminic acid hydroxylase               | Cmah                                 | transport /// CMP-N-<br>acetylneuraminic acid metabolic process<br>/// oxidation reduction                                                                                                                         | iron ion binding /// ubiquinol-<br>cytochrome-c reductase activity ///<br>electron carrier activity ///<br>oxidoreductase activity /// CMP-N-<br>acetylneuraminic acid monooxygenase<br>activity /// CMP-N-acetylneuraminic<br>acid monooxygenase activity /// metal ion<br>binding /// iron-sulfur cluster binding<br>/// 2 iron, 2 sulfur cluster binding                  | cytoplasm /// cytoplasm /// endoplasmic<br>reticulum /// membrane                                                                                                            |
| 0.9640       | 1449038_a_t  | hydroxysteroid 11-beta dehydrogenase 1                                 | Hsd11b1                              | lipid metabolic process /// metabolic<br>process /// steroid metabolic process<br>/// lung development                                                                                                             | catalytic activity /// 11-beta-<br>hydroxysteroid dehydrogenase<br>activity /// 11-beta-hydroxysteroid<br>dehydrogenase activity /// binding ///<br>oxidoreductase activity                                                                                                                                                                                                  | endoplasmic reticulum /// endoplasmic<br>reticulum membrane /// microsome ///<br>membrane /// integral to membrane                                                           |
| 0.9635       | 1452893_s_at | RIKEN cDNA 1110065P19 gene /// RIKEN cDNA 2310040A07 gene              | 1110065P19 Rik ///<br>2310040A07 Rik | ---                                                                                                                                                                                                                | ---                                                                                                                                                                                                                                                                                                                                                                          | membrane /// integral to membrane                                                                                                                                            |

|         |                                                                               |                |                                                                                                                                                                                                                                                                                                                                                                                                                                                                                                                                                                                                                                                                                                                                                                                                                                                                                                  |                                                                                                                                                                                                                  |
|---------|-------------------------------------------------------------------------------|----------------|--------------------------------------------------------------------------------------------------------------------------------------------------------------------------------------------------------------------------------------------------------------------------------------------------------------------------------------------------------------------------------------------------------------------------------------------------------------------------------------------------------------------------------------------------------------------------------------------------------------------------------------------------------------------------------------------------------------------------------------------------------------------------------------------------------------------------------------------------------------------------------------------------|------------------------------------------------------------------------------------------------------------------------------------------------------------------------------------------------------------------|
| 0.9614  | 1422701_a zeta-chain (TCR) associated protein kinase                          | Zap70          | protein amino acid phosphorylation // nucleotide binding // protein amino acid phosphorylation // phosphotyrosine binding // protein signal transduction // intracellular signaling cascade // peptidyl-tyrosine phosphorylation // peptidyl-tyrosine phosphorylation // beta selection // positive thymic T cell selection // positive thymic T cell selection // negative thymic T cell selection // thymic T cell selection // positive regulation of T cell differentiation // positive regulation of T cell differentiation // positive regulation of alpha-beta T cell differentiation // positive regulation of alpha-beta T cell differentiation // positive regulation of alpha-beta T cell proliferation // protein amino acid autophosphorylation // protein amino acid autophosphorylation // positive regulation of calcium-mediated signaling // T cell receptor signaling pathway | cytoplasm // cytosol // T cell receptor complex                                                                                                                                                                  |
| 0.9590  | 1443180_a ---                                                                 | ---            | ---                                                                                                                                                                                                                                                                                                                                                                                                                                                                                                                                                                                                                                                                                                                                                                                                                                                                                              | ---                                                                                                                                                                                                              |
| 0.9565  | 1424367_a homer homolog 2                                                     | Homer2         | metabotropic glutamate receptor signaling pathway                                                                                                                                                                                                                                                                                                                                                                                                                                                                                                                                                                                                                                                                                                                                                                                                                                                | actin binding // protein binding // GKAP/Homer scaffold activity                                                                                                                                                 |
| 0.9559  | 1432543_a Kruppel-like factor 13                                              | Klf13          | transcription // regulation of transcription, DNA-dependent // transcription from RNA polymerase II promoter // positive regulation of transcription from RNA polymerase II promoter                                                                                                                                                                                                                                                                                                                                                                                                                                                                                                                                                                                                                                                                                                             | nucleic acid binding // DNA binding // DNA binding // DNA binding // RNA polymerase II transcription factor activity // RNA polymerase II transcription factor activity // zinc ion binding // metal ion binding |
| 0.9552  | 1418808_a retinol dehydrogenase 5                                             | Rdh5           | metabolic process // metabolic process                                                                                                                                                                                                                                                                                                                                                                                                                                                                                                                                                                                                                                                                                                                                                                                                                                                           | catalytic activity // retinol dehydrogenase activity // retinol dehydrogenase activity // binding // oxidoreductase activity                                                                                     |
| 0.9463  | 1435255_a plexin B1                                                           | Plxnb1         | signal transduction // multicellular organismal development // positive regulation of axonogenesis                                                                                                                                                                                                                                                                                                                                                                                                                                                                                                                                                                                                                                                                                                                                                                                               | receptor activity // protein binding                                                                                                                                                                             |
| 0.9441  | 1447458_a ---                                                                 | ---            | ---                                                                                                                                                                                                                                                                                                                                                                                                                                                                                                                                                                                                                                                                                                                                                                                                                                                                                              | ---                                                                                                                                                                                                              |
| 0.9426  | 1454880_s Bcl2 modifying factor                                               | Bmf            | apoptosis // apoptosis // regulation of apoptosis                                                                                                                                                                                                                                                                                                                                                                                                                                                                                                                                                                                                                                                                                                                                                                                                                                                | protein binding                                                                                                                                                                                                  |
| -0.9401 | 1416023_a stearyl-Coenzyme A desaturase 1                                     | Fabp3          | phosphatidylcholine biosynthetic process // transport                                                                                                                                                                                                                                                                                                                                                                                                                                                                                                                                                                                                                                                                                                                                                                                                                                            | transporter activity // binding // lipid binding                                                                                                                                                                 |
| -0.9408 | 1424118_a SPC25, NDC80 kinetochore complex component, homolog (S. cerevisiae) | Spc25          | cell cycle // mitosis // cell division                                                                                                                                                                                                                                                                                                                                                                                                                                                                                                                                                                                                                                                                                                                                                                                                                                                           | ---                                                                                                                                                                                                              |
| -0.9410 | 1417449_a acyl-CoA thioesterase 8                                             | Acot8          | acyl-CoA metabolic process // acyl-CoA metabolic process // peroxisome organization and biogenesis                                                                                                                                                                                                                                                                                                                                                                                                                                                                                                                                                                                                                                                                                                                                                                                               | carboxylesterase activity // palmitoyl-CoA hydrolase activity // acyl-CoA thioesterase activity // acyl-CoA thioesterase activity // hydrolase activity // choloyl-CoA hydrolase activity                        |
| -0.9423 | 1417900_a very low density lipoprotein receptor                               | Vldlr          | lipid metabolic process // transport // lipid transport // endocytosis // steroid metabolic process // cholesterol metabolic process // positive regulation of protein kinase activity                                                                                                                                                                                                                                                                                                                                                                                                                                                                                                                                                                                                                                                                                                           | receptor activity // lipid transporter activity // calcium ion binding // protein binding                                                                                                                        |
| -0.9428 | 1438310_a ---                                                                 | ---            | ---                                                                                                                                                                                                                                                                                                                                                                                                                                                                                                                                                                                                                                                                                                                                                                                                                                                                                              | ---                                                                                                                                                                                                              |
| -0.9438 | 1450884_a CD36 antigen                                                        | Cd36           | transport // cell adhesion // cell adhesion // cholesterol transport // apoptotic cell clearance                                                                                                                                                                                                                                                                                                                                                                                                                                                                                                                                                                                                                                                                                                                                                                                                 | receptor activity // protein binding // high-density lipoprotein binding                                                                                                                                         |
| -0.9444 | 1451290_a microtubule-associated protein 1 light chain 3 alpha                | Map1lc3a       | autophagic vacuole formation // autophagic vacuole formation // ubiquitin cycle // autophagy                                                                                                                                                                                                                                                                                                                                                                                                                                                                                                                                                                                                                                                                                                                                                                                                     | protein binding // microtubule binding                                                                                                                                                                           |
| -0.9444 | 1434671_a RIKEN cDNA B230337E12 gene                                          | B230337E12 Rik | ---                                                                                                                                                                                                                                                                                                                                                                                                                                                                                                                                                                                                                                                                                                                                                                                                                                                                                              | ---                                                                                                                                                                                                              |

|         |                  |                                                                                          |                                  |                                                                                                                                                                                                   |                                                                                                                                                                                                                                                                                                                                                   |                                                                                                                                                        |
|---------|------------------|------------------------------------------------------------------------------------------|----------------------------------|---------------------------------------------------------------------------------------------------------------------------------------------------------------------------------------------------|---------------------------------------------------------------------------------------------------------------------------------------------------------------------------------------------------------------------------------------------------------------------------------------------------------------------------------------------------|--------------------------------------------------------------------------------------------------------------------------------------------------------|
| -0.9449 | 1419435_a<br>t   | aldehyde oxidase<br>1                                                                    | Aox1                             | oxidation reduction                                                                                                                                                                               | catalytic activity /// aldehyde oxidase activity /// aldehyde oxidase activity /// iron ion binding /// electron carrier activity /// electron carrier activity /// oxidoreductase activity /// molybdenum ion binding /// metal ion binding /// FAD binding /// NAD binding /// iron-sulfur cluster binding /// 2 iron, 2 sulfur cluster binding | cytoplasm                                                                                                                                              |
| -0.9450 | 1418486_a<br>t   | vanin 1                                                                                  | Vnn1                             | nitrogen compound metabolic process                                                                                                                                                               | hydrolase activity /// hydrolase activity, acting on carbon-nitrogen (but not peptide) bonds /// hydrolase activity, acting on carbon-nitrogen (but not peptide) bonds, in linear amides /// pantetheine hydrolase activity                                                                                                                       | extracellular space /// plasma membrane /// membrane /// anchored to membrane                                                                          |
| -0.9451 | 1418321_a<br>t   | dodecenoyl-Coenzyme A delta isomerase (3,2 trans-enoyl-Coenzyme A isomerase)             | Dci                              | lipid metabolic process /// fatty acid metabolic process /// fatty acid beta-oxidation /// metabolic process                                                                                      | catalytic activity /// dodecenoyl-CoA delta-isomerase activity /// dodecenoyl-CoA delta-isomerase activity /// isomerase activity                                                                                                                                                                                                                 | mitochondrion /// mitochondrion /// mitochondrion /// mitochondrial inner membrane /// mitochondrial matrix                                            |
| -0.9453 | 1451421_a<br>_at | rogdi homolog (Drosophila)                                                               | Rogdi                            | positive regulation of cell proliferation                                                                                                                                                         | ---                                                                                                                                                                                                                                                                                                                                               | ---                                                                                                                                                    |
| -0.9453 | 1438448_a<br>t   | otopetrin 1                                                                              | Otop1                            | ossification /// detection of gravity /// inner ear morphogenesis                                                                                                                                 | ---                                                                                                                                                                                                                                                                                                                                               | extracellular region /// membrane /// membrane /// integral to membrane                                                                                |
| -0.9455 | 1456642_x<br>_at | S100 calcium binding protein A10 (calpactin)                                             | S100a10                          | ---                                                                                                                                                                                               | calcium ion binding                                                                                                                                                                                                                                                                                                                               | ---                                                                                                                                                    |
| -0.9458 | 1450391_a<br>_at | monoglyceride lipase                                                                     | Mgl1                             | ---                                                                                                                                                                                               | catalytic activity /// carboxylesterase activity /// hydrolase activity /// acylglycerol lipase activity                                                                                                                                                                                                                                          | ---                                                                                                                                                    |
| -0.9459 | 1422997_s<br>_at | acyl-CoA thioesterase 1 /// acyl-CoA thioesterase 2 /// similar to acyl-CoA thioesterase | Acot1 /// Acot2 /// LOC100044830 | long-chain fatty acid metabolic process /// lipid metabolic process /// acyl-CoA metabolic process                                                                                                | carboxylesterase activity /// palmitoyl-CoA hydrolase activity /// acyl-CoA thioesterase activity /// acyl-CoA thioesterase activity /// hydrolase activity                                                                                                                                                                                       | cytoplasm /// cytoplasm /// mitochondrion /// mitochondrion /// mitochondrion /// mitochondrial matrix                                                 |
| -0.9460 | 1433779_a<br>t   | cancer susceptibility candidate 4                                                        | Casc4                            | ---                                                                                                                                                                                               | ---                                                                                                                                                                                                                                                                                                                                               | membrane /// integral to membrane                                                                                                                      |
| -0.9465 | 1450883_a<br>_at | CD36 antigen                                                                             | Cd36                             | transport /// cell adhesion /// cell adhesion /// cholesterol transport /// apoptotic cell clearance                                                                                              | receptor activity /// protein binding /// high-density lipoprotein binding                                                                                                                                                                                                                                                                        | plasma membrane /// membrane /// integral to membrane /// integral to membrane                                                                         |
| -0.9474 | 1417273_a<br>t   | pyruvate dehydrogenase kinase, isoenzyme 4                                               | Pdk4                             | carbohydrate metabolic process /// glucose metabolic process /// acetyl-CoA biosynthetic process from pyruvate /// signal transduction /// phosphorylation /// peptidyl-histidine phosphorylation | two-component sensor activity /// protein histidine kinase activity /// protein serine/threonine/tyrosine kinase activity /// pyruvate dehydrogenase (acetyl-transferring) kinase activity /// ATP binding /// kinase activity /// transferase activity /// transferase activity, transferring phosphorus-containing groups                       | mitochondrion /// mitochondrion /// mitochondrial inner membrane /// mitochondrial matrix                                                              |
| -0.9496 | 1424167_a<br>_at | phosphomannomutase 1                                                                     | Pmm1                             | metabolic process /// mannose biosynthetic process                                                                                                                                                | catalytic activity /// phosphomannomutase activity /// isomerase activity                                                                                                                                                                                                                                                                         | cytoplasm                                                                                                                                              |
| -0.9497 | 1429523_a<br>_at | solute carrier family 39 (metal ion transporter), member 5                               | Slc39a5                          | transport /// ion transport /// zinc ion transport /// zinc ion transport /// cellular zinc ion homeostasis /// metal ion transport                                                               | zinc ion transmembrane transporter activity /// zinc ion binding /// metal ion transmembrane transporter activity                                                                                                                                                                                                                                 | membrane /// integral to membrane /// basolateral plasma membrane /// basolateral plasma membrane                                                      |
| -0.9498 | 1419365_a<br>t   | peroxisomal biogenesis factor 11a                                                        | Pex11a                           | peroxisome organization and biogenesis /// peroxisome organization and biogenesis /// signal transduction /// peroxisome fission                                                                  | ---                                                                                                                                                                                                                                                                                                                                               | peroxisome /// peroxisome /// peroxisomal membrane /// integral to peroxisomal membrane /// membrane /// integral to membrane /// integral to membrane |
| -0.9515 | 1416591_a<br>t   | RAB34, member of RAS oncogene family                                                     | Rab34                            | transport /// endocytosis /// small GTPase mediated signal transduction /// protein transport                                                                                                     | nucleotide binding /// GTPase activity /// GTP binding /// guanyl nucleotide binding                                                                                                                                                                                                                                                              | ruffle /// cytoplasm /// early endosome /// Golgi apparatus                                                                                            |
| -0.9517 | 1438258_a<br>t   | very low density lipoprotein receptor                                                    | Vldlr                            | lipid metabolic process /// transport /// lipid transport /// endocytosis /// steroid metabolic process /// cholesterol metabolic process /// positive regulation of protein kinase activity      | receptor activity /// lipid transporter activity /// calcium ion binding /// protein binding                                                                                                                                                                                                                                                      | extracellular space /// extracellular space /// membrane fraction /// coated pit /// membrane /// integral to membrane /// integral to membrane        |
| -0.9519 | 1450061_a<br>t   | ectodermal-neural cortex 1                                                               | Enc1                             | ubiquitin cycle /// multicellular organismal development                                                                                                                                          | actin binding /// protein binding                                                                                                                                                                                                                                                                                                                 | cytoplasm /// cytoskeleton                                                                                                                             |
| -0.9522 | 1428083_a<br>t   | RIKEN cDNA 2310043N10 gene                                                               | 2310043N10<br>Rik                | ---                                                                                                                                                                                               | ---                                                                                                                                                                                                                                                                                                                                               | ---                                                                                                                                                    |
| -0.9528 | 1436313_a<br>t   | SCY1-like 2 (S. cerevisiae)                                                              | Scyl2                            | protein amino acid phosphorylation                                                                                                                                                                | protein kinase activity /// binding /// ATP binding                                                                                                                                                                                                                                                                                               | cytoplasm /// endosome /// Golgi apparatus /// endosome membrane /// membrane /// cytoplasmic vesicle                                                  |
| -0.9529 | 1417963_a<br>t   | phospholipid transfer protein                                                            | Pltp                             | transport /// lipid transport                                                                                                                                                                     | lipid binding                                                                                                                                                                                                                                                                                                                                     | extracellular region /// extracellular space                                                                                                           |

|         |                                                                                                    |                          |                                                                                                                                                               |                                                                                                                                                                                                                                                                                                           |                                                                                                                                                          |
|---------|----------------------------------------------------------------------------------------------------|--------------------------|---------------------------------------------------------------------------------------------------------------------------------------------------------------|-----------------------------------------------------------------------------------------------------------------------------------------------------------------------------------------------------------------------------------------------------------------------------------------------------------|----------------------------------------------------------------------------------------------------------------------------------------------------------|
| -0.9534 | 1424716_a retinol saturase (all trans retinol 13,14 reductase)                                     | Retsat                   | carotenoid biosynthetic process /// retinol metabolic process /// oxidation reduction                                                                         | electron carrier activity /// oxidoreductase activity /// oxidoreductase activity /// oxidoreductase activity, acting on paired donors, with incorporation or reduction of molecular oxygen /// FAD binding /// all-trans-retinol 13,14-reductase activity /// all-trans-retinol 13,14-reductase activity | nuclear outer membrane /// endoplasmic reticulum /// endoplasmic reticulum membrane /// endoplasmic reticulum membrane /// membrane /// nuclear membrane |
| -0.9537 | 1449065_a acyl-CoA thioesterase 1 /// similar to acyl-CoA thioesterase                             | Acot1 /// LOC100044830   | long-chain fatty acid metabolic process /// lipid metabolic process /// acyl-CoA metabolic process                                                            | carboxylesterase activity /// palmitoyl-CoA hydrolase activity /// acyl-CoA thioesterase activity /// acyl-CoA thioesterase activity /// hydrolase activity                                                                                                                                               | cytoplasm                                                                                                                                                |
| -0.9540 | 1434382_a serine incorporator 2 /// hypothetical protein LOC100044221                              | Serinc2 /// LOC100044221 | phosphatidylserine metabolic process /// positive regulation of transferase activity                                                                          | ---                                                                                                                                                                                                                                                                                                       | membrane /// integral to membrane /// integral to membrane                                                                                               |
| -0.9545 | 1419504_a monoacylglycerol O-acyltransferase 1 /// similar to monoacylglycerol O-acyltransferase 1 | Mogat1 /// LOC100047046  | glycerol metabolic process /// lipid metabolic process /// diacylglycerol biosynthetic process /// lipid biosynthetic process /// cell redox homeostasis      | 2-acylglycerol O-acyltransferase activity /// 2-acylglycerol O-acyltransferase activity /// diacylglycerol O-acyltransferase activity /// acyltransferase activity /// transferase activity                                                                                                               | membrane fraction /// endoplasmic reticulum /// endoplasmic reticulum membrane /// membrane /// integral to membrane                                     |
| -0.9545 | 1421425_a regulator of calcineurin 2                                                               | Rcan2                    | calcium-mediated signaling                                                                                                                                    | ---                                                                                                                                                                                                                                                                                                       | ---                                                                                                                                                      |
| -0.9548 | 1436314_a SCY1-like 2 (S. cerevisiae)                                                              | Scy12                    | protein amino acid phosphorylation                                                                                                                            | protein kinase activity /// binding /// ATP binding                                                                                                                                                                                                                                                       | cytoplasm /// endosome /// Golgi apparatus /// endosome membrane /// membrane /// cytoplasmic vesicle                                                    |
| -0.9552 | 1447845_s vanin 1                                                                                  | Vnn1                     | nitrogen compound metabolic process                                                                                                                           | hydrolase activity /// hydrolase activity, acting on carbon-nitrogen (but not peptide) bonds /// hydrolase activity, acting on carbon-nitrogen (but not peptide) bonds, in linear amides /// pantetheine hydrolase activity                                                                               | extracellular space /// plasma membrane /// membrane /// anchored to membrane                                                                            |
| -0.9554 | 1422811_a solute carrier family 27 (fatty acid transporter), member 1                              | Slc27a1                  | long-chain fatty acid metabolic process /// lipid metabolic process /// fatty acid metabolic process /// transport /// lipid transport /// metabolic process  | nucleotide binding /// catalytic activity /// long-chain-fatty-acid-CoA ligase activity /// transporter activity /// binding /// ligase activity                                                                                                                                                          | cytoplasm /// plasma membrane /// plasma membrane /// endomembrane system /// membrane /// integral to membrane /// cytoplasmic vesicle                  |
| -0.9554 | 1421878_a mitogen-activated protein kinase 9                                                       | Mapk9                    | protein amino acid phosphorylation /// JNK cascade                                                                                                            | nucleotide binding /// protein kinase activity /// protein serine/threonine kinase activity /// JUN kinase activity /// MAP kinase activity /// protein binding /// ATP binding /// kinase activity /// transferase activity                                                                              | nucleus                                                                                                                                                  |
| -0.9557 | 1426857_a hydroxysteroid dehydrogenase like 2                                                      | Hsd12                    | metabolic process                                                                                                                                             | catalytic activity /// binding /// sterol carrier activity /// sterol carrier activity /// oxidoreductase activity                                                                                                                                                                                        | mitochondrion                                                                                                                                            |
| -0.9563 | 1423166_a CD36 antigen                                                                             | Cd36                     | transport /// cell adhesion /// cell adhesion /// cholesterol transport /// apoptotic cell clearance                                                          | receptor activity /// protein binding /// high-density lipoprotein binding                                                                                                                                                                                                                                | plasma membrane /// membrane /// integral to membrane /// integral to membrane                                                                           |
| -0.9565 | 1435549_a transient receptor potential cation channel, subfamily M, member 4                       | Trpm4                    | transport /// ion transport /// cation transport /// calcium ion transport /// calcium ion transport /// immune response /// regulation of membrane potential | nucleotide binding /// ion channel activity /// calcium activated cation channel activity /// voltage-gated ion channel activity /// cation channel activity /// calcium channel activity /// calcium channel activity /// calcium ion binding /// calmodulin binding /// ATP binding                     | plasma membrane /// plasma membrane /// membrane /// membrane /// integral to membrane /// integral to membrane                                          |
| -0.9576 | 1440134_a cytochrome P450, Cyp4a31 family 4, subfamily a, polypeptide 31                           | Cyp4a31                  | oxidation reduction                                                                                                                                           | monooxygenase activity /// iron ion binding /// electron carrier activity /// oxidoreductase activity /// heme binding /// metal ion binding                                                                                                                                                              | ---                                                                                                                                                      |
| -0.9580 | 1451488_a RIKEN cDNA 1110028A07 gene                                                               | 1110028A07 Rik           | ---                                                                                                                                                           | ---                                                                                                                                                                                                                                                                                                       | extracellular space /// membrane /// integral to membrane /// integral to membrane                                                                       |
| -0.9594 | 1418989_a cathepsin E                                                                              | Ctse                     | proteolysis /// antigen processing and presentation of exogenous peptide antigen via MHC class II                                                             | aspartic-type endopeptidase activity /// cathepsin E activity /// cathepsin E activity /// pepsin A activity /// neutrophil collagenase activity /// peptidase activity /// hydrolase activity /// protein homodimerization activity                                                                      | extracellular space /// endosome /// endosome /// viral envelope                                                                                         |
| -0.9595 | 1421430_a RAD51-like 1 (S. cerevisiae)                                                             | Rad511                   | DNA metabolic process /// DNA repair /// DNA recombination /// response to DNA damage stimulus                                                                | nucleotide binding /// DNA binding /// ATP binding /// DNA-dependent ATPase activity /// nucleoside-triphosphatase activity                                                                                                                                                                               | nucleus                                                                                                                                                  |
| -0.9599 | 1441971_a ---                                                                                      | ---                      | ---                                                                                                                                                           | ---                                                                                                                                                                                                                                                                                                       | ---                                                                                                                                                      |
| -0.9608 | 1442508_a RIKEN cDNA 4933404M19 gene                                                               | 4933404M19 Rik           | ---                                                                                                                                                           | ---                                                                                                                                                                                                                                                                                                       | ---                                                                                                                                                      |

|         |                                                                                   |                |                                                                                                                                                                                                                                                               |                                                                                                                                                                                                                                                                                                                                                                                                                                                                                                                               |                                                                                                                                                          |
|---------|-----------------------------------------------------------------------------------|----------------|---------------------------------------------------------------------------------------------------------------------------------------------------------------------------------------------------------------------------------------------------------------|-------------------------------------------------------------------------------------------------------------------------------------------------------------------------------------------------------------------------------------------------------------------------------------------------------------------------------------------------------------------------------------------------------------------------------------------------------------------------------------------------------------------------------|----------------------------------------------------------------------------------------------------------------------------------------------------------|
| -0.9628 | 1421011_a hydroxysteroid (17-beta) dehydrogenase 11                               | Hsd17b11       | steroid biosynthetic process /// androgen catabolic process /// metabolic process /// metabolic process /// lipid biosynthetic process                                                                                                                        | catalytic activity /// estradiol 17-beta-dehydrogenase activity /// binding /// steroid dehydrogenase activity /// oxidoreductase activity                                                                                                                                                                                                                                                                                                                                                                                    | extracellular region /// cytoplasm                                                                                                                       |
| -0.9631 | 1417177_a galactokinase 1                                                         | Galk1          | carbohydrate metabolic process /// galactose metabolic process /// galactose metabolic process /// galactose metabolic process /// metabolic process /// phosphorylation /// galactitol metabolic process /// carbohydrate phosphorylation                    | nucleotide binding /// galactokinase activity /// galactokinase activity /// protein binding /// ATP binding /// kinase activity /// transferase activity /// phosphotransferase activity, alcohol group as acceptor                                                                                                                                                                                                                                                                                                          | cytoplasm                                                                                                                                                |
| -0.9634 | 1415776_a aldehyde dehydrogenase family 3, subfamily A2                           | Aldh3a2        | aldehyde metabolic process /// metabolic process                                                                                                                                                                                                              | aldehyde dehydrogenase (NAD) activity /// aldehyde dehydrogenase [NAD(P)+] activity /// oxidoreductase activity                                                                                                                                                                                                                                                                                                                                                                                                               | mitochondrial inner membrane /// endoplasmic reticulum /// endoplasmic reticulum membrane /// membrane /// integral to membrane /// integral to membrane |
| -0.9634 | 1426146_a choline phosphotransferase 1                                            | Chpt1          | phosphatidylcholine biosynthetic process /// platelet activating factor biosynthetic process /// apoptosis /// phospholipid biosynthetic process /// regulation of apoptosis /// negative regulation of apoptosis /// negative regulation of caspase activity | magnesium ion binding /// diacylglycerol cholinephosphotransferase activity /// diacylglycerol cholinephosphotransferase activity /// transferase activity /// phosphotransferase activity, for other substituted phosphate groups /// manganese ion binding /// metal ion binding                                                                                                                                                                                                                                            | Golgi membrane /// cytoplasm /// Golgi apparatus /// membrane /// integral to membrane                                                                   |
| -0.9646 | 1418438_a fatty acid binding protein 2, intestinal                                | Fabp2          | transport                                                                                                                                                                                                                                                     | transporter activity /// binding /// lipid binding                                                                                                                                                                                                                                                                                                                                                                                                                                                                            | cytoplasm                                                                                                                                                |
| -0.9653 | 1421422_a RIKEN cDNA 5033411D12 gene                                              | 5033411D12 Rik | metabolic process                                                                                                                                                                                                                                             | catalytic activity /// transferase activity                                                                                                                                                                                                                                                                                                                                                                                                                                                                                   | ---                                                                                                                                                      |
| -0.9656 | 1455267_a estrogen-related receptor gamma                                         | Esrrg          | transcription /// regulation of transcription, DNA-dependent /// regulation of transcription, DNA-dependent /// regulation of transcription, DNA-dependent /// multicellular organismal development /// positive regulation of transcription, DNA-dependent   | DNA binding /// DNA binding /// DNA binding /// transcription factor activity /// transcription factor activity /// steroid hormone receptor activity /// receptor activity /// receptor activity /// ligand-dependent nuclear receptor activity /// ligand-dependent nuclear receptor activity /// steroid binding /// calmodulin binding /// zinc ion binding /// tRNA-pseudouridine synthase activity /// transcription activator activity /// sequence-specific DNA binding /// metal ion binding /// AF-2 domain binding | nucleus /// nucleus                                                                                                                                      |
| -0.9683 | 1430780_a phosphomannomutase 1                                                    | Pmm1           | metabolic process /// mannose biosynthetic process                                                                                                                                                                                                            | catalytic activity /// phosphomannomutase activity /// isomerase activity                                                                                                                                                                                                                                                                                                                                                                                                                                                     | cytoplasm                                                                                                                                                |
| -0.9691 | 1435446_a choline phosphotransferase 1                                            | Chpt1          | phosphatidylcholine biosynthetic process /// platelet activating factor biosynthetic process /// apoptosis /// phospholipid biosynthetic process /// regulation of apoptosis /// negative regulation of apoptosis /// negative regulation of caspase activity | magnesium ion binding /// diacylglycerol cholinephosphotransferase activity /// diacylglycerol cholinephosphotransferase activity /// transferase activity /// phosphotransferase activity, for other substituted phosphate groups /// manganese ion binding /// metal ion binding                                                                                                                                                                                                                                            | Golgi membrane /// cytoplasm /// Golgi apparatus /// membrane /// integral to membrane                                                                   |
| -0.9696 | 1429786_a ZW10 interacto                                                          | Zwint          | cell cycle /// mitosis /// cell division                                                                                                                                                                                                                      | ---                                                                                                                                                                                                                                                                                                                                                                                                                                                                                                                           | chromosome, pericentric region /// nucleus                                                                                                               |
| -0.9702 | 1415932_x ATPase, class II, type 9A                                               | Atp9a          | transport /// cation transport /// metabolic process /// phospholipid transport                                                                                                                                                                               | nucleotide binding /// magnesium ion binding /// catalytic activity /// phospholipid-translocating ATPase activity /// ATP binding /// ATPase activity, coupled to transmembrane movement of ions, phosphorylative mechanism /// hydrolase activity /// metal ion binding                                                                                                                                                                                                                                                     | membrane /// integral to membrane /// integral to membrane                                                                                               |
| -0.9723 | 1422906_a ATP-binding cassette, subfamily G (WHITE), member 2                     | Abcg2          | transport                                                                                                                                                                                                                                                     | nucleotide binding /// ATP binding /// ATPase activity /// nucleoside-triphosphatase activity                                                                                                                                                                                                                                                                                                                                                                                                                                 | plasma membrane /// membrane /// integral to membrane                                                                                                    |
| -0.9799 | 1456769_a dual specificity phosphatase 3 (vaccinia virus phosphatase VH1-related) | Dusp3          | protein amino acid dephosphorylation /// dephosphorylation                                                                                                                                                                                                    | phosphoprotein phosphatase activity /// protein tyrosine phosphatase activity /// protein tyrosine/serine/threonine phosphatase activity /// protein tyrosine/serine/threonine phosphatase activity /// hydrolase activity /// phosphoric monoester hydrolase activity                                                                                                                                                                                                                                                        | ---                                                                                                                                                      |
